# Supplementary material for: Fe-BPsalan complex-catalyzed asymmetric 1,3-dipolar [3 + 2] cycloaddition reaction of N,N′-cyclic azomethine imines with α,β-unsaturated acyl imidazoles
Source: Royal Society of Chemistry journal article supplement (doi:10.1039/d2qo01895k), 2023-01-01
Supplement: d2qo01895k1.pdf [file d2qo01895k1.pdf]

## Supporting Information

|                                                                                                |      |
|------------------------------------------------------------------------------------------------|------|
| 1. General Information.....                                                                    | 2    |
| 2. General procedure for the synthesis of Fe-BPsalan complexes and starting materials<br>..... | 3    |
| 3. Synthesis of Substrates .....                                                               | 4    |
| 3.1 Synthesis of 1-(1-methyl-1H-imidazol-2-yl)ethanone.....                                    | 4    |
| 3.2 Synthesis of $\alpha,\beta$ -unsaturated acyl imidazoles .....                             | 5    |
| 3.3 Synthesis of <i>N,N'</i> -cyclic azomethine imines .....                                   | 6    |
| 4. Asymmetric [3+2] Cycloaddition Reactions.....                                               | 6    |
| 4.1 Synthesis of racemic products as HPLC references .....                                     | 6    |
| 4.2 Substrate Scope.....                                                                       | 7    |
| 5. $^1\text{H}$ NMR and $^{13}\text{C}$ NMR Spectra .....                                      | 433  |
| 6. HPLC Traces on Chiral Stationary Phase .....                                                | 766  |
| 7. X-Ray Crystallography .....                                                                 | 1255 |
| Reference .....                                                                                | 133  |

## 1. General Information

All non-aqueous reactions were performed in oven-dried glassware and standard Schlenk tubes under an atmosphere of argon. Solvents were refluxed over magnesium (methanol, ethanol), acetonitrile ( $\text{CH}_3\text{CN}$ ), dichloromethane (DCM) and 1,2-dichloroethane (DCE) were distilled from  $\text{CaH}_2$  under inert atmosphere. Tetrahydrofuran (THF) and toluene were distilled from sodium under inert atmosphere. Chloroform ( $\text{CHCl}_3$ ) were distilled from phosphorus pentoxide under inert atmosphere. All other solvents and reagents were used as received unless otherwise noted. Thin layer chromatography was performed using silica gel HSGF254 precoated plates (0.2~0.3 mm) and visualized by short-wave UV (254 nm) irradiation, potassium permanganate, or iodine stain. Column chromatography was performed with silica gel (200-300 mesh, Yantai Xunjiang Economic and Trade Co., Ltd). The  $^1\text{H}$  NMR spectra were obtained in  $\text{CDCl}_3$  using a Varian Avance III spectrometer at 400 MHz,  $^{13}\text{C}$  and  $^{19}\text{F}$  NMR spectra were obtained in  $\text{CDCl}_3$  using a Bruker Avance III spectrometer at 500 and 376 MHz, respectively. Chemical shifts ( $\delta$ ) for  $^1\text{H}$  NMR spectra are recorded in parts per million from tetramethylsilane with the solvent resonance as the internal standard (chloroform,  $\delta$  7.26 ppm). Datas are reported as follows: chemical shift, multiplicity (s = singlet, d = doublet, t = triplet, q = quartet, qn = quintet, m = multiplet and br = broad), coupling constant in Hz, and integration. Chemical shifts for  $^{13}\text{C}$  NMR spectra are recorded in parts per million from tetramethylsilane using the central peak of deuteriochloroform ( $\delta$  77.16 ppm) as the internal standard. Infrared spectra were prepared as KBr pellets or neat and were recorded on a Nicolet iN10 MX spectrometer. HRMS data were obtained on a Thermo Fisher Scientific LTQ FT Ultrasystem. Optical rotations were measured with a Perkin-Elmer 241 polarimeter at concentrations of 1.0 g/100 mL. X-ray structures were obtained with a Microfocus sealed Cu tube from Incote. HPLC analysis were conducted on an Agilent 1100 Series chromatograph. Mass spectra were recorded by the mass spectrometry service of Shanghai Institute of Organic Chemistry.

## 2. General procedure for the synthesis of Fe-BPsalan complexes and starting materials

### General procedure for the synthesis of Fe-BPsalan complexes

Fe-BPsalan complexes (**1a-k**) with (*R,R'*)-bipyrrolidine backbone BPsalan ligands were prepared by the corresponding literature procedures reported by our group.<sup>1</sup>

Iron(III) complexes were prepared by the corresponding literature procedures.

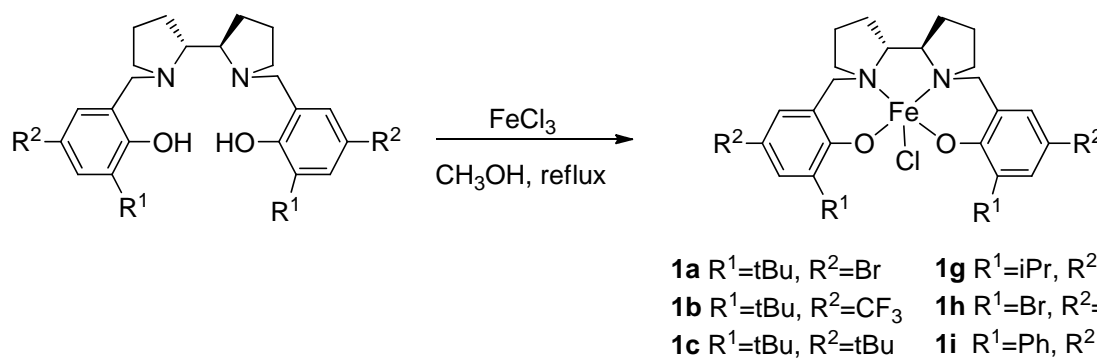

### 3. Synthesis of Substrates

#### 3.1 Synthesis of 1-(1-methyl-1H-imidazol-2-yl)ethanone

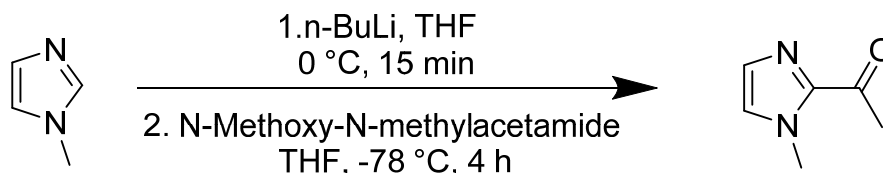

Compound S<sub>1</sub> was synthesized *via* a modification of the procedure as literature.<sup>2</sup> An oven-dried 100 mL round-bottomed flask under an argon atmosphere was charged with 1-methylimidazole (7.01 g, 6.8 mL, 85.34 mmol, 1.1 equiv) and dry THF (120 mL). The solution was cooled to -78 °C in a dry ice/ethanol bath for 15 min, then *n*-BuLi (2.5 M in *n*-hexane, 49.65 mL, 124.13 mmol, 1.6 equiv) was added dropwise over 10 min. The mixture was stirred at -78 °C for 2 h, then cannulated into a solution of N-Methoxy-N-methylacetamide (8 g, 8.25 mL, 77.58 mmol, 1 equiv) in dry THF (80 mL) at -78 °C. The reaction mixture was then stirred at -78 °C for 2 h. Return to room temperature and add 120 mL water to quench *n*-BuLi. The aqueous phase was extracted with EtOAc (3 x 60 mL) and the combined organic layer was dried over anhydrous MgSO<sub>4</sub>, gravity filtered and concentrated under reduced pressure. The residue was purified by silica gel flash chromatography, eluting with EtOAc/pentane (1:2) to provide the title compound (molecular formula: C<sub>6</sub>H<sub>8</sub>N<sub>2</sub>O, M<sub>w</sub> = 124.14 g/mol, 5.95 g) as a colorless oil in 62% yield. R<sub>f</sub>: 0.31 (EtOAc/pentane = 9:1). IR (neat) 3108, 2959, 1674, 1402, 915, 776 cm<sup>-1</sup>. <sup>1</sup>H NMR (400 MHz, CDCl<sub>3</sub>) δ 7.14 (d, J = 0.9 Hz, 1H), 7.02 (br, s, 1H), 3.99 (s, 3H), 2.66 (s, 3H). <sup>13</sup>C NMR (100 MHz, CDCl<sub>3</sub>) δ 190.2 (s), 142.9 (s), 128.7 (d), 126.7 (d), 35.9 (q), 26.8 (q). Spectroscopic data were consistent with the literature data for this compound.

### 3.2 Synthesis of $\alpha,\beta$ -unsaturated acyl imidazoles

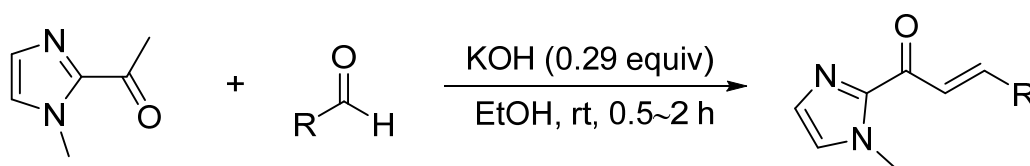

$\alpha,\beta$ -unsaturated 1-acylimidazoles 2a-r were prepared according to a reported procedure. Accordingly, 1-Methyl-2-acetylimidazole (20.0 mmol, 1.0 eq) and EtOH (10 mL) were added to a 25 mL round-bottom flask followed by the aromatic aldehyde (20 mmol, 1 eq) and KOH (5.8 mmol, 0.29 eq). The solution was stirred until a lot of precipitate came out. Vacuum filtrated and flushed with PE. The filter residue was dissolved in dichloromethane and then extracted with distilled water (3 x 30 mL) for three times. The organic layers were dried over anhydrous  $MgSO_4$ , filtered and concentrated. The product was recrystallized by DCM and PE.

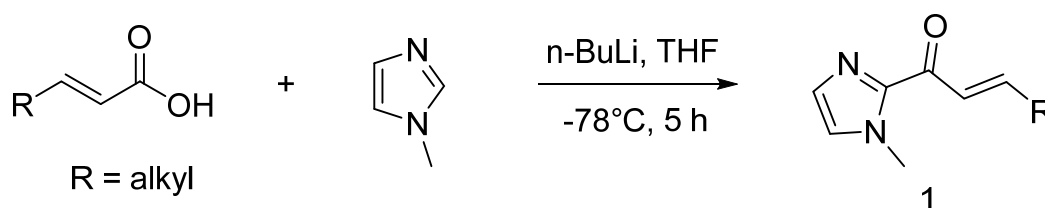

The  $\alpha,\beta$ -unsaturated substrates 1a-b were synthesized via a modification of the procedure originally reported by Evans and co-workers.<sup>3</sup> An oven-dried, 250 mL round-bottomed flask under an argon atmosphere was charged with 1-methylimidazole (24 mmol, 2.4 equiv) and dry THF (50 mL). The solution was cooled to  $-78^\circ C$  in a dry ice/ethanol bath for 15 min, then  $n-BuLi$  (2.5 M in  $n$ -hexane, 24 mmol, 2.4 equiv) was added drop-wise over 10 min. The mixture was warmed to rt and stirred for 30 min, then cooled back to  $-78^\circ C$ . The desired acid (10 mmol, 1 equiv) in dry THF (10 mL) was added drop-wise over a 10 min period. The resulting solution was stirred at  $-78^\circ C$  for 15 min, then warmed at rt and stirred for 2 h. The reaction was eventually quenched with a saturated aqueous  $NaHCO_3$  solution (50 mL) and the aqueous phase was extracted with EtOAc (3 x 40 mL). The combined organic

layers were washed with brine (2 x 40 mL), dried over MgSO<sub>4</sub>, gravity filtered, and concentrated under reduced pressure. The reaction residue was purified by silica gel flash chromatography, eluting with EtOAc/pentane (1:3) as the eluent.

### 3.3 Synthesis of *N,N'*-cyclic azomethine imines

*N,N'*-cyclic azomethine imines (**3a-3l**) were prepared according to a general procedure.<sup>4</sup> Accordingly, methacrylate (10.46 mL) was added to the solution of hydrazine hydrate (7.06 mL) in 35 mL ethanol which was cooled in an ice bath. After addition, the mixture was heated to reflux for 8 h. Then the solvent and the volatile components were removed under reduced pressure. The thick colorless oil, crude pyrazolidin-3-one, was obtained in about 95% yield. By subjecting pyrazolidin-3-one (1 equiv) to various aromatic aldehydes (1.1 equiv) in methanol (20 mmol in 15 mL of methanol) at room temperature, the crude products of the desired 3-oxo-1,2-pyrazolidinium ylides were formed. After removing the solvent methanol, the crude product was recrystallized in ethanol. Washed by ethyl acetate and dried under a vacuum, the pure product was obtained.

## 4. Asymmetric [3+2] Cycloaddition Reactions

### 4.1 Synthesis of racemic products as HPLC references

**General Procedure:** A dried 25 mL Schlenk tube was charged with *α,β*-unsaturated *α,β*-unsaturated 1-acylimidazoles **2** (0.20 mmol), *N,N'*-cyclic azomethine imines **3** (0.24 mmol) and Cu(OTf)<sub>2</sub> (3.62 mg, 5.0 mol%). The tube was purged with argon and anhydrous DCE (2 mL) was added. The reaction mixture was stirred at room temperature for indicated time (monitored by TLC) under argon. The mixture was purified by flash column chromatography on silica gel (petroleum ether/ EtOAc = 1:1 to 1:2, basified with 1.0% Et<sub>3</sub>N) to afford racemic products as HPLC reference for determination of enantiomeric excess.

## 4.2 Substrate Scope

**General Procedure:** A dried 25 mL Schlenk tube was charged with chiral catalyst **Fe-BPsalan** (5.0 mol%) and added silver salt (5.0 mol%  $\text{AgSbF}_6$ ) in the glove box. Then the tube was purged with argon and anhydrous DCE (2 mL) was added. Stir at room temperature for 30 minutes.  $\alpha,\beta$ -unsaturated 1-acylimidazoles (0.20 mmol) was add continue stirring at room temperature for 30 minutes, finally  $N,N'$ -cyclic azomethine imines **3** (0.24 mmol) was added. The reaction mixture was stirred at room temperature for indicated time (monitored by TLC) under argon. The mixture was purified by flash column chromatography on silica gel (petroleum ether/ EtOAc = 1:1 to 1:2, basified with 1.0%  $\text{Et}_3\text{N}$ ) to afford chiral products.

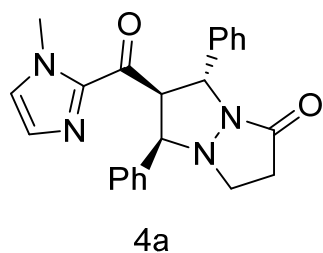

Following General Procedure, A dried 25 mL Schlenk tube was charged with chiral catalyst **Fe-BPsalan** (5.0 mol%) and added silver salt (5.0 mol%  $\text{AgSbF}_6$ ) in the glove box. Then the tube was purged with argon and anhydrous DCE (2 mL) was added. Stir at room temperature for 30 minutes.  $\alpha,\beta$ -unsaturated 1-acylimidazoles **2a** (42.45 mg, 0.20 mmol) was add continue stirring at room temperature for 30 minutes, finally  $N,N'$ -cyclic azomethine imines **3a** (41.81 mg, 0.24 mmol) was added. The reaction mixture was stirred at room temperature for indicated time (monitored by TLC) under argon. The mixture was purified by flash column chromatography on silica gel (petroleum ether/ EtOAc = 1:2, basified with 1.0%  $\text{Et}_3\text{N}$ ) to afford chiral product **4a** as white foamed solid (73.1 mg, yield: 95%, dr>99:1), the dr value was determined by crude  $^1\text{H}$  NMR analysis. Enantiomeric excess was determined by HPLC analysis,  $ee = 95\%$  (Chiralpak column IG,  $\lambda = 254$  nm,  $\text{CH}_3\text{OH}/i\text{-PrOH} = 90:10$ , flow rate: 0.5 mL/min, 25 °C,  $\text{tr}(\text{minor}) = 20.38$  min,  $\text{tr}(\text{major}) = 12.53$  min).  $[\alpha]_{\text{D}} = -53.6780$  (c 1.0,

CHCl<sub>3</sub>).

<sup>1</sup>H NMR (400 MHz, CDCl<sub>3</sub>) δ 7.25 (d, J = 8.7 Hz, 2H), 7.12 (t, J = 7.5 Hz, 2H), 7.07 – 7.01 (m, 1H), 7.00 – 6.92 (m, 3H), 6.86 (dd, J = 7.1, 2.4 Hz, 2H), 6.72 (s, 1H), 6.54 (s, 1H), 5.56 (d, J = 6.1 Hz, 1H), 4.83 (dd, J = 7.8, 6.1 Hz, 1H), 4.60 (d, J = 8.0 Hz, 1H), 3.34 (s, 3H), 3.06 – 2.85 (m, 2H), 2.37 (ddd, J = 16.6, 9.3, 4.9 Hz, 1H), 2.15 (s, 1H); <sup>13</sup>C NMR (125 MHz, Chloroform-d) δ 187.37, 167.85, 142.67, 139.82, 134.09, 129.12, 129.05, 128.85, 128.36, 128.32, 127.74, 126.82, 126.37, 70.13, 65.74, 55.91, 45.57, 35.46, 34.65;

HRMS (ESI, *m/z*) calcd for C<sub>23</sub>H<sub>22</sub>N<sub>4</sub>O<sub>2</sub>Na [M+Na]<sup>+</sup>: 409.1634, found: 409.1635.

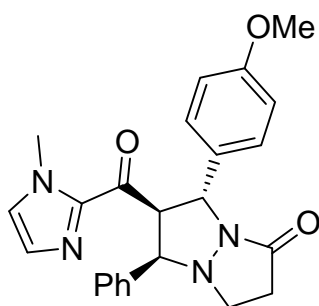

4b

Following General Procedure, A dried 25 mL Schlenk tube was charged with chiral catalyst Fe-BPsalan (5.0 mol%) and added silver salt (5.0 mol% AgSbF<sub>6</sub>) in the glove box. Then the tube was purged with argon and anhydrous DCE (2 mL) was added. Stir at room temperature for 30 minutes.  $\alpha,\beta$ -unsaturated 1-acylimidazoles 2b (48.46 mg, 0.20 mmol) was add continue stirring at room temperature for 30 minutes, finally N,N'-cyclic azomethine imines 3a (41.81 mg, 0.24 mmol) was added. The reaction mixture was stirred at room temperature for indicated time (monitored by TLC) under argon. The mixture was purified by flash column chromatography on silica gel (petroleum ether/ EtOAc = 1:2, basified with 1.0% Et<sub>3</sub>N) to afford chiral product 4b as white foamed solid (58.4 mg, yield: 71%, dr>99:1), the dr value was determined by crude <sup>1</sup>H NMR analysis. Enantiomeric excess was determined by



HPLC analysis, *ee* = 95% (Chiralpak column IA,  $\lambda$  = 254 nm, CH<sub>3</sub>OH/*i*-PrOH = 90:10, flow rate: 0.5 mL/min, 25 °C, tr(minor) = 17.19 min, tr(major) = 9.73 min).  
[ $\alpha$ ]<sub>D</sub> = -36.2792 (c 1.0, CHCl<sub>3</sub>).

<sup>1</sup>H NMR (400 MHz, Chloroform-*d*)  $\delta$  7.41 – 7.34 (m, 2H), 7.14 (d, *J* = 7.0 Hz, 3H), 7.05 (d, *J* = 7.7 Hz, 2H), 6.91 (s, 1H), 6.85 (d, *J* = 8.8 Hz, 2H), 6.73 (s, 1H), 5.74 – 5.61 (m, 1H), 5.02 (dd, *J* = 7.9, 6.1 Hz, 1H), 4.81 – 4.68 (m, 1H), 3.75 (s, 3H), 3.52 (s, 3H), 3.19 – 3.02 (m, 2H), 2.56 (dt, *J* = 16.5, 7.0 Hz, 1H), 2.38 (s, 1H). <sup>13</sup>C NMR (125 MHz, Chloroform-*d*)  $\delta$  187.58, 167.32, 159.16, 142.75, 134.16, 131.74, 129.10, 128.96, 128.31, 128.26, 127.73, 126.80, 114.25, 70.24, 65.67, 55.60, 55.33, 45.95, 35.45, 34.91.

HRMS (ESI, *m/z*) calcd for C<sub>24</sub>H<sub>24</sub>N<sub>4</sub>O<sub>3</sub>Na [M+Na]<sup>+</sup>: 439.1752, found: 439.1741.

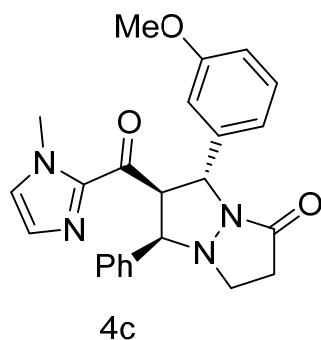

Following General Procedure, A dried 25 mL Schlenk tube was charged with chiral catalyst Fe-BPsalan (5.0 mol%) and added silver salt (5.0 mol% AgSbF<sub>6</sub>) in the glove box. Then the tube was purged with argon and anhydrous DCE (2 mL) was added. Stir at room temperature for 30 minutes.  $\alpha,\beta$ -unsaturated 1-acylimidazoles 2c (48.46 mg, 0.20 mmol) was add continue stirring at room temperature for 30 minutes, finally N,N'-cyclic azomethine imines 3a (41.81 mg, 0.24 mmol) was added. The reaction mixture was stirred at room temperature for indicated time (monitored by TLC) under argon. The mixture was purified by flash column chromatography on silica gel (petroleum ether/ EtOAc = 1:2, basified with 1.0% Et<sub>3</sub>N) to afford chiral product 4c as white foamed solid (78.6 mg, yield: 95%, dr>70:1), the dr value was determined by crude <sup>1</sup>H NMR analysis. Enantiomeric excess was determined by

HPLC analysis, *ee* = 97% (Chiralpak column IG,  $\lambda$  = 254 nm, CH<sub>3</sub>OH/*i*-PrOH = 90:10, flow rate: 0.5 mL/min, 25 °C, *tr*(minor) = 27.92 min, *tr*(major) = 14.11 min).  
[ $\alpha$ ]<sub>D</sub> = -53.7798 (c 1.0, CHCl<sub>3</sub>).

<sup>1</sup>H NMR (400 MHz, Chloroform-*d*)  $\delta$  7.45 (dd, *J* = 15.4, 7.6 Hz, 1H), 7.37 (d, *J* = 5.9 Hz, 3H), 7.24 (s, 3H), 7.20 (s, 1H), 7.13 (s, 1H), 6.95 (s, 2H), 5.95 (d, *J* = 5.9 Hz, 1H), 5.33 – 5.14 (m, 1H), 5.01 (d, *J* = 7.6 Hz, 1H), 3.98 (s, 3H), 3.75 (s, 3H), 3.40 (t, *J* = 9.8 Hz, 1H), 3.30 (s, 1H), 2.77 (ddd, *J* = 15.1, 8.9, 4.7 Hz, 1H), 2.53 (s, 1H).  
<sup>13</sup>C NMR (125 MHz, Chloroform-*d*)  $\delta$  187.31, 167.92, 159.93, 142.65, 141.53, 134.07, 129.92, 129.11, 129.06, 128.35, 128.29, 126.80, 118.55, 113.06, 112.12, 70.04, 65.73, 55.78, 55.24, 45.45, 35.43, 34.58.

HRMS (ESI, *m/z*) calcd for C<sub>24</sub>H<sub>24</sub>N<sub>4</sub>O<sub>3</sub>Na [M+Na]<sup>+</sup>: 439.1745, found: 439.1741.

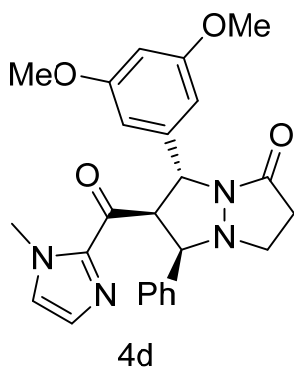

Following General Procedure, A dried 25 mL Schlenk tube was charged with chiral catalyst Fe-BPsalan (5.0 mol%) and added silver salt (5.0 mol% AgSbF<sub>6</sub>) in the glove box. Then the tube was purged with argon and anhydrous DCE (2 mL) was added. Stir at room temperature for 30 minutes.  $\alpha,\beta$ -unsaturated 1-acylimidazoles 2d (54.46 mg, 0.20 mmol) was add continue stirring at room temperature for 30 minutes, finally N,N'-cyclic azomethine imines 3a (41.81 mg, 0.24 mmol) was added. The reaction mixture was stirred at room temperature for indicated time (monitored by TLC) under argon. The mixture was purified by flash column chromatography on silica gel (petroleum ether/ EtOAc = 1:2, basified with 1.0% Et<sub>3</sub>N) to afford chiral product 4d as white foamed solid (83.3 mg, yield: 93%, *dr* > 90:1), the *dr* value was determined by crude <sup>1</sup>H NMR analysis. Enantiomeric excess was determined by

HPLC analysis, *ee* = 96% (Chiralpak column IA,  $\lambda$  = 254 nm, CH<sub>3</sub>OH/*i*-PrOH = 90:10, flow rate: 0.5 mL/min, 25 °C, tr(minor) = 12.89 min, tr(major) = 9.54 min).  
[ $\alpha$ ]<sub>D</sub> = -72.1552(c 1.0, CHCl<sub>3</sub>).

<sup>1</sup>H NMR (400 MHz, Chloroform-*d*)  $\delta$  7.17 – 7.11 (m, 3H), 7.05 – 6.98 (m, 2H), 6.90 (s, 1H), 6.73 (s, 1H), 6.59 (d, *J* = 2.3 Hz, 2H), 6.31 (d, *J* = 1.2 Hz, 1H), 5.67 (d, *J* = 5.8 Hz, 1H), 4.98 (dd, *J* = 7.8, 6.1 Hz, 1H), 4.77 (d, *J* = 7.7 Hz, 1H), 3.73 (s, 6H), 3.51 (s, 3H), 3.18 (q, *J* = 10.1 Hz, 1H), 3.05 (s, 1H), 2.53 (ddd, *J* = 15.1, 9.5, 5.1 Hz, 1H), 2.28 (s, 1H). <sup>13</sup>C NMR (125 MHz, Chloroform-*d*)  $\delta$  187.24 , 167.97 , 161.10 , 142.62 , 142.42 , 134.03 , 129.10 , 129.04 , 128.33 , 128.28 , 126.78 , 104.33 , 99.49 , 69.93 , 65.71 , 55.80 , 55.32 , 45.30 , 35.40 , 34.51 .

HRMS (ESI, *m/z*) calcd for C<sub>25</sub>H<sub>26</sub>N<sub>4</sub>O<sub>4</sub>Na [M+Na]<sup>+</sup>: 469.1841, found: 469.1846.

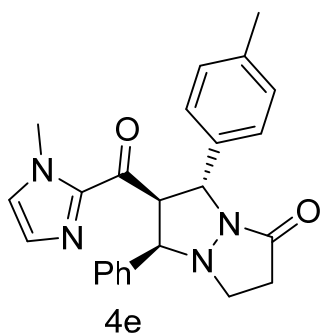

Following General Procedure, A dried 25 mL Schlenk tube was charged with chiral catalyst Fe-BPsalan (5.0 mol%) and added silver salt (5.0 mol% AgSbF<sub>6</sub>) in the glove box. Then the tube was purged with argon and anhydrous DCE (2 mL) was added. Stir at room temperature for 30 minutes.  $\alpha,\beta$ -unsaturated 1-acylimidazoles 2e (45.26 mg, 0.20 mmol) was add continue stirring at room temperature for 30 minutes, finally N,N'-cyclic azomethine imines 3a (41.81 mg, 0.24 mmol) was added. The reaction mixture was stirred at room temperature for indicated time (monitored by TLC) under argon. The mixture was purified by flash column chromatography on silica gel (petroleum ether/ EtOAc = 1:2, basified with 1.0% Et<sub>3</sub>N) to afford chiral product 4e as white foamed solid (71.8 mg, yield: 90%, dr>99:1), the dr value was

determined by crude  $^1\text{H}$  NMR analysis. Enantiomeric excess was determined by HPLC analysis,  $ee = 95\%$  (Chiralpak column IA,  $\lambda = 254\text{ nm}$ ,  $\text{CH}_3\text{OH}/i\text{-PrOH} = 90:10$ , flow rate:  $0.5\text{ mL/min}$ ,  $25\text{ }^\circ\text{C}$ ,  $\text{tr}(\text{minor}) = 13.51\text{ min}$ ,  $\text{tr}(\text{major}) = 9.51\text{ min}$ ).  $[\alpha]_{\text{D}} = -43.8725$  (c  $1.0$ ,  $\text{CHCl}_3$ ).

$^1\text{H}$  NMR ( $400\text{ MHz}$ , Chloroform- $d$ )  $\delta$  7.34 (d,  $J = 8.0\text{ Hz}$ , 2H), 7.18 – 7.10 (m, 5H), 7.06 (d,  $J = 6.7\text{ Hz}$ , 2H), 6.91 (s, 1H), 6.73 (s, 1H), 5.69 (d,  $J = 5.8\text{ Hz}$ , 1H), 5.08 – 4.98 (m, 1H), 4.76 (d,  $J = 7.9\text{ Hz}$ , 1H), 3.53 (d,  $J = 1.9\text{ Hz}$ , 3H), 3.23 – 2.98 (m, 2H), 2.63 – 2.52 (m, 1H), 2.45 (s, 1H), 2.29 (s, 3H).

$^{13}\text{C}$  NMR ( $125\text{ MHz}$ , Chloroform- $d$ )  $\delta$  187.53 , 167.31 , 142.73 , 137.39 , 136.66 , 134.13 , 129.50 , 129.08 , 128.97 , 128.29 , 128.25 , 126.78 , 126.37 , 70.17 , 65.66 , 55.81 , 45.97 , 35.44 , 34.89 , 21.15 .

HRMS (ESI,  $m/z$ ) calcd for  $\text{C}_{24}\text{H}_{24}\text{N}_4\text{O}_2\text{Na}$   $[\text{M}+\text{Na}]^+$ : 423.1803, found: 423.1792.

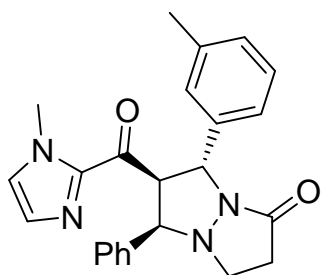

4f

Following General Procedure, A dried 25 mL Schlenk tube was charged with chiral catalyst Fe-BPsalan (5.0 mol%) and add silver salt (5.0 mol%  $\text{AgSbF}_6$ ) in the glove box. Then the tube was purged with argon and anhydrous DCE (2 mL) was added. Stir at room temperature for 30 minutes.  $\alpha,\beta$ -unsaturated 1-acylimidazoles 2f (45.26 mg, 0.20 mmol) was add continue stirring at room temperature for 30 minutes, finally  $\text{N,N}'$ -cyclic azomethine imines 3a (41.81 mg, 0.24 mmol) was added. The reaction mixture was stirred at room temperature for indicated time (monitored by TLC) under argon. The mixture was purified by flash column chromatography on silica gel (petroleum ether/ EtOAc = 1:2, basified with 1.0%  $\text{Et}_3\text{N}$ ) to afford chiral

product 4f as white foamed solid (71.7 mg, yield: 90%, dr>50:1), the dr value was determined by crude  $^1\text{H}$  NMR analysis. Enantiomeric excess was determined by HPLC analysis,  $ee = 95\%$  (Chiralpak column IA,  $\lambda = 254\text{ nm}$ ,  $\text{CH}_3\text{OH}/i\text{-PrOH} = 90:10$ , flow rate:  $0.5\text{ mL/min}$ ,  $25\text{ }^\circ\text{C}$ ,  $\text{tr}(\text{minor}) = 10.95\text{ min}$ ,  $\text{tr}(\text{major}) = 8.29\text{ min}$ ).  $[\alpha]_{\text{D}} = -59.1702$  (c 1.0,  $\text{CHCl}_3$ ).

$^1\text{H}$  NMR (400 MHz, Chloroform- $d$ )  $\delta$  7.25 – 7.11 (m, 6H), 7.08 – 7.01 (m, 3H), 6.91 (s, 1H), 6.73 (s, 1H), 5.72 (d,  $J = 6.1\text{ Hz}$ , 1H), 5.04 – 4.99 (m, 1H), 4.79 (d,  $J = 7.6\text{ Hz}$ , 1H), 3.52 (s, 3H), 3.19 (q,  $J = 9.8\text{ Hz}$ , 1H), 3.09 (s, 1H), 2.56 (ddd,  $J = 15.0, 9.1, 4.8\text{ Hz}$ , 1H), 2.47 (s, 1H), 2.31 (s, 3H).  $^{13}\text{C}$  NMR (125 MHz, Chloroform- $d$ )  $\delta$  187.39, 167.74, 142.68, 139.75, 138.45, 134.13, 129.08, 129.05, 128.71, 128.53, 128.33, 128.27, 126.98, 126.77, 123.44, 70.11, 65.77, 55.84, 45.50, 35.42, 34.65, 21.52.

HRMS (ESI,  $m/z$ ) calcd for  $\text{C}_{24}\text{H}_{24}\text{N}_4\text{O}_2\text{Na}$   $[\text{M}+\text{Na}]^+$ : 423.1785, found: 423.1792.

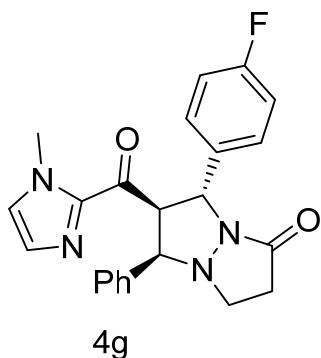

Following General Procedure, A dried 25 mL Schlenk tube was charged with chiral catalyst Fe-BPsalan (5.0 mol%) and add silver salt (5.0 mol%  $\text{AgSbF}_6$ ) in the glove box. Then the tube was purged with argon and anhydrous DCE (2 mL) was added. Stir at room temperature for 30 minutes.  $\alpha,\beta$ -unsaturated 1-acylimidazoles 2g (46.05mg, 0.20 mmol) was add continue stirring at room temperature for 30 minutes, finally  $\text{N,N}'$ -cyclic azomethine imines 3a (41.81 mg, 0.24 mmol) was added. The reaction mixture was stirred at room temperature for indicated time (monitored by

TLC) under argon. The mixture was purified by flash column chromatography on silica gel (petroleum ether/ EtOAc = 1:2, basified with 1.0% Et<sub>3</sub>N) to afford chiral product 4g as white foamed solid (45.6 mg, yield: 57%, dr>90:1), the dr value was determined by crude <sup>1</sup>H NMR analysis. Enantiomeric excess was determined by HPLC analysis, *ee* = 95% (Chiralpak column IA, λ = 254 nm, CH<sub>3</sub>OH/*i*-PrOH = 90:10, flow rate: 0.5 mL/min, 25 °C, tr(minor) = 12.08 min, tr(major) = 8.63 min). [α]<sub>D</sub> = -52.7004(c 1.0, CHCl<sub>3</sub>).

<sup>1</sup>H NMR (400 MHz, Chloroform-*d*) δ 7.43 (dd, *J* = 8.0, 4.0 Hz, 2H), 7.16 (q, *J* = 4.0 Hz, 3H), 7.10-6.97 (m, 4H), 6.94 (s, 1H), 6.76 (s, 1H), 5.76 (d, *J* = 4.0 Hz, 1H), 4.98 (t, *J* = 8.0 Hz, 1H), 4.81 (d, *J* = 4.0 Hz, 1H), 3.54 (s, 3H), 3.26 3.02 (m, 2H), 2.62-2.49 (m, 1H), 2.31 (s, 1H).

<sup>13</sup>C NMR (125 MHz, Chloroform-*d*) δ 187.25, 168.33, 161.38, 142.69, 135.73, 134.07, 129.25, 129.12, 128.47, 128.43, 128.25, 128.18, 126.91, 115.85, 115.68, 70.24, 65.87, 55.37, 45.38, 35.51, 34.57.

HRMS (ESI, *m/z*) calcd for C<sub>23</sub>H<sub>21</sub>N<sub>4</sub>O<sub>2</sub>NaF [M+Na]<sup>+</sup>: 427.1546, found: 427.1541.

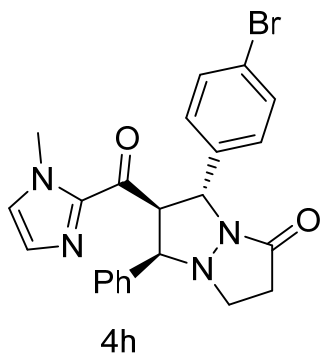

Following General Procedure, A dried 25 mL Schlenk tube was charged with chiral catalyst Fe-BPsalan (5.0 mol%) and silver salt (5.0 mol% AgSbF<sub>6</sub>) in the glove box. Then the tube was purged with argon and anhydrous DCE (2 mL) was added. Stir at room temperature for 30 minutes. *α,β*-unsaturated 1-acylimidazoles 2h (58.23 mg, 0.20 mmol) was add continue stirring at room temperature for 30 minutes, finally N,N'-cyclic azomethine imines 3a (41.81 mg, 0.24 mmol) was added. The reaction mixture was stirred at room temperature for indicated time (monitored by TLC) under

argon. The mixture was purified by flash column chromatography on silica gel (petroleum ether/ EtOAc = 1:2, basified with 1.0% Et<sub>3</sub>N) to afford chiral product 4h as white foamed solid (90.4mg, yield: 97%, dr>99:1), the dr value was determined by crude <sup>1</sup>H NMR analysis. Enantiomeric excess was determined by HPLC analysis, *ee* = 98% (Chiralpak column IG, λ = 254 nm, CH<sub>3</sub>OH/*i*-PrOH = 90:10, flow rate: 0.5 mL/min, 25 °C, tr(minor) = 30.12 min, tr(major) = 14.86 min). [α]<sub>D</sub> = -46.3460(c 1.0, CHCl<sub>3</sub>).

<sup>1</sup>H NMR (400 MHz, Chloroform-*d*) δ 7.50 – 7.39 (m, 2H), 7.33 (d, *J* = 8.5 Hz, 2H), 7.16 (dd, *J* = 5.4, 1.9 Hz, 3H), 7.02 (dd, *J* = 6.8, 2.8 Hz, 2H), 6.94 (s, 1H), 6.75 (s, 1H), 5.73 (d, *J* = 6.3 Hz, 1H), 5.01 – 4.92 (m, 1H), 4.81 (d, *J* = 7.8 Hz, 1H), 3.53 (s, 3H), 3.19 (dd, *J* = 14.4, 5.8 Hz, 1H), 3.08 (q, *J* = 8.7 Hz, 1H), 2.54 (ddd, *J* = 16.9, 9.4, 4.9 Hz, 1H), 2.29 (s, 1H).

<sup>13</sup>C NMR (125 MHz, Chloroform-*d*) δ 187.03 , 168.39 , 142.57 , 139.06 , 133.96 , 131.94 , 129.26 , 129.10 , 128.45 , 128.44 , 128.22 , 126.93 , 121.66 , 70.16 , 65.71 , 55.40 , 45.32 , 35.48 , 34.43 .

HRMS (ESI, *m/z*) calcd for C<sub>23</sub>H<sub>21</sub>N<sub>4</sub>O<sub>2</sub>NaBr [M+Na]<sup>+</sup>: 487.0751, found: 487.0740.

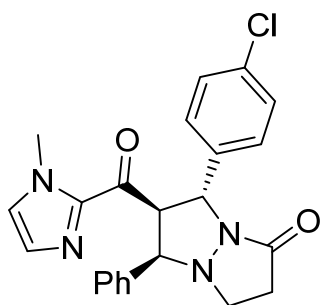

4i

Following General Procedure, A dried 25 mL Schlenk tube was charged with chiral catalyst Fe-BPsalan (5.0 mol%) and add silver salt (5.0 mol% AgSbF<sub>6</sub>) in the glove box. Then the tube was purged with argon and anhydrous DCE (2 mL) was added. Stir at room temperature for 30 minutes.  $\alpha,\beta$ -unsaturated 1-acylimidazoles 2i (49.34mg, 0.20 mmol) was add continue stirring at room temperature for 30 minutes,

finally *N,N'*-cyclic azomethine imines **3a** (41.81 mg, 0.24 mmol) was added. The reaction mixture was stirred at room temperature for indicated time (monitored by TLC) under argon. The mixture was purified by flash column chromatography on silica gel (petroleum ether/ EtOAc = 1:2, basified with 1.0% Et<sub>3</sub>N) to afford chiral product **4i** as white foamed solid (81.4 mg, yield: 97%, dr>99:1), the dr value was determined by crude <sup>1</sup>H NMR analysis. Enantiomeric excess was determined by HPLC analysis, *ee* = 98% (Chiralpak column IG, λ = 254 nm, CH<sub>3</sub>OH/*i*-PrOH = 90:10, flow rate: 0.5 mL/min, 25 °C, tr(minor) = 30.12 min, tr(major) = 14.86 min). [α]<sub>D</sub> = -50.5944(c 1.0, CHCl<sub>3</sub>).

<sup>1</sup>H NMR (400 MHz, Chloroform-*d*) δ 7.25 (d, *J* = 8.5 Hz, 2H), 7.14 (dd, *J* = 9.7, 3.3 Hz, 2H), 7.02 (dd, *J* = 5.7, 2.0 Hz, 3H), 6.88 (dd, *J* = 6.8, 2.8 Hz, 2H), 6.80 (s, 1H), 6.61 (s, 1H), 5.60 (d, *J* = 6.2 Hz, 1H), 4.82 (t, *J* = 7.1 Hz, 1H), 4.67 (d, *J* = 8.0 Hz, 1H), 3.39 (s, 3H), 3.06 (q, *J* = 9.8 Hz, 1H), 2.95 (s, 1H), 2.40 (ddd, *J* = 16.8, 9.3, 4.9 Hz, 1H), 2.14 (s, 1H).

<sup>13</sup>C NMR (125 MHz, Chloroform-*d*) δ 187.07 , 168.37 , 142.58 , 138.53 , 133.97 , 133.49 , 129.25 , 129.09 , 128.99 , 128.44 , 128.43 , 127.87 , 126.92 , 70.17 , 65.75 , 55.34 , 45.32 , 35.46 , 34.44 .

HRMS (ESI, *m/z*) calcd for C<sub>23</sub>H<sub>21</sub>N<sub>4</sub>O<sub>2</sub>NaCl [M+Na]<sup>+</sup>: 443.1249, found: 443.1245.

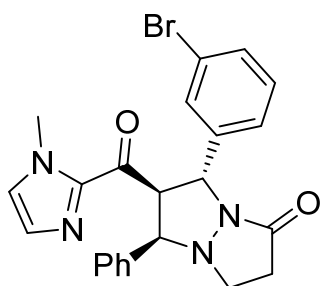

**4j**

Following General Procedure, A dried 25 mL Schlenk tube was charged with chiral catalyst Fe-BPsalan (5.0 mol%) and silver salt (5.0 mol% AgSbF<sub>6</sub>) in the glove box. Then the tube was purged with argon and anhydrous DCE (2 mL) was added. Stir at room temperature for 30 minutes. *α,β*-unsaturated 1-acylimidazoles **2j** (58.23



mg, 0.20 mmol) was added continue stirring at room temperature for 30 minutes, finally *N,N'*-cyclic azomethine imines 3a (41.81 mg, 0.24 mmol) was added. The reaction mixture was stirred at room temperature for indicated time (monitored by TLC) under argon. The mixture was purified by flash column chromatography on silica gel (petroleum ether/ EtOAc = 1:2, basified with 1.0% Et<sub>3</sub>N) to afford chiral product 4j as white foamed solid (91.4mg, yield: 98%, dr>99:1), the dr value was determined by crude <sup>1</sup>H NMR analysis. Enantiomeric excess was determined by HPLC analysis, *ee* = 94% (Chiralpak column IG, λ = 254 nm, CH<sub>3</sub>OH/*i*-PrOH = 90:10, flow rate: 0.5 mL/min, 25 °C, tr(minor) = 26.25 min, tr(major) = 13.03 min). [α]<sub>D</sub> = -58.5334(c 1.0, CHCl<sub>3</sub>).

<sup>1</sup>H NMR (400 MHz, Chloroform-*d*) δ 7.59 (t, *J* = 1.9 Hz, 1H), 7.42 – 7.32 (m, 2H), 7.21 – 7.12 (m, 4H), 7.01 (dd, *J* = 6.6, 2.9 Hz, 2H), 6.97 – 6.85 (m, 1H), 6.82 – 6.67 (m, 1H), 5.76 (d, *J* = 6.4 Hz, 1H), 4.95 (dd, *J* = 7.8, 6.4 Hz, 1H), 4.84 (s, 1H), 3.53 (s, 3H), 3.24 (q, *J* = 9.9 Hz, 1H), 3.15 – 2.98 (m, 1H), 2.53 (ddd, *J* = 16.5, 9.6, 4.8 Hz, 1H).

<sup>13</sup>C NMR (125 MHz, Chloroform-*d*) δ 186.85 , 168.88 , 142.50 , 133.94 , 130.89 , 130.43 , 129.33 , 129.25 , 129.17 , 128.48 , 128.45 , 126.92 , 125.14 , 122.95 , 70.11 , 65.83 , 55.23 , 44.86 , 35.46 , 34.18 .

HRMS (ESI, *m/z*) calcd for C<sub>23</sub>H<sub>21</sub>N<sub>4</sub>O<sub>2</sub>NaBr [M+Na]<sup>+</sup>: 487.0748, found: 487.0740.

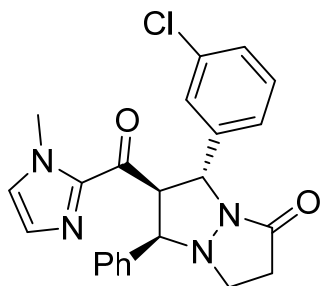

4k

Following General Procedure, A dried 25 mL Schlenk tube was charged with chiral catalyst Fe-BPsalan (5.0 mol%) and silver salt (5.0 mol% AgSbF<sub>6</sub>) to the glove

box. Then the tube was purged with argon and anhydrous DCE (2 mL) was added. Stir at room temperature for 30 minutes.  $\alpha,\beta$ -unsaturated 1-acylimidazoles 2k (49.34 mg, 0.20 mmol) was add continue stirring at room temperature for 30 minutes, finally  $N,N'$ -cyclic azomethine imines 3a (41.81 mg, 0.24 mmol) was added. The reaction mixture was stirred at room temperature for indicated time (monitored by TLC) under argon. The mixture was purified by flash column chromatography on silica gel (petroleum ether/ EtOAc = 1:2, basified with 1.0% Et<sub>3</sub>N) to afford chiral product 4k as white foamed solid (80.1mg, yield: 95%, dr>99:1), the dr value was determined by crude <sup>1</sup>H NMR analysis. Enantiomeric excess was determined by HPLC analysis, *ee* = 95% (Chiralpak column IG,  $\lambda$  = 254 nm, CH<sub>3</sub>OH/*i*-PrOH = 90:10, flow rate: 0.5 mL/min, 25 °C, tr(minor) = 22.05 min, tr(major) = 12.35 min). [ $\alpha$ ]<sub>D</sub> = -62.4594(c 1.0, CHCl<sub>3</sub>).

<sup>1</sup>H NMR (400 MHz, Chloroform-*d*)  $\delta$  7.51 (s, 1H), 7.40 (d, *J* = 7.4 Hz, 1H), 7.34 – 7.21 (m, 5H), 7.12 – 7.05 (m, 2H), 7.01 (s, 1H), 6.83 (s, 1H), 5.84 (d, *J* = 6.3 Hz, 1H), 5.03 (t, *J* = 7.1 Hz, 1H), 4.91 (d, *J* = 7.9 Hz, 1H), 3.61 (s, 3H), 3.32 (q, *J* = 10.0 Hz, 1H), 3.14 (t, *J* = 12.1 Hz, 1H), 2.61 (ddd, *J* = 15.2, 9.5, 4.7 Hz, 1H), 2.30 (s, 1H).

<sup>13</sup>C NMR (125 MHz, Chloroform-*d*)  $\delta$  186.90 , 168.81 , 142.53 , 142.21 , 134.70 , 133.96 , 130.16 , 129.25 , 129.17 , 128.48 , 128.44 , 127.95 , 126.92 , 126.47 , 124.65 , 70.13 , 65.82 , 55.30 , 44.94 , 35.46 , 34.22 .

HRMS (ESI, *m/z*) calcd for C<sub>23</sub>H<sub>21</sub>N<sub>4</sub>O<sub>2</sub>NaCl [M+Na]<sup>+</sup>: 443.1250, found: 443.1245.

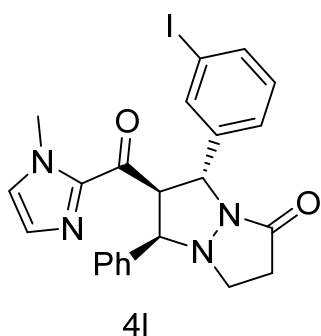

Following General Procedure, A dried 25 mL Schlenk tube was charged with chiral catalyst Fe-BPsalan (5.0 mol%) and silver salt (5.0 mol% AgSbF<sub>6</sub>) in the glove box. Then the tube was purged with argon and anhydrous DCE (2 mL) was added. Stir at room temperature for 30 minutes.  $\alpha,\beta$ -unsaturated 1-acylimidazoles 2l (67.63 mg, 0.20 mmol) was added continue stirring at room temperature for 30 minutes, finally N,N'-cyclic azomethine imines 3a (41.81 mg, 0.24 mmol) was added. The reaction mixture was stirred at room temperature for indicated time (monitored by TLC) under argon. The mixture was purified by flash column chromatography on silica gel (petroleum ether/ EtOAc = 1:2, basified with 1.0% Et<sub>3</sub>N) to afford chiral product 4l as white foamed solid (94mg, yield: 92%, dr>90:1), the dr value was determined by crude <sup>1</sup>H NMR analysis. Enantiomeric excess was determined by HPLC analysis, ee = 96% (Chiralpak column IA,  $\lambda$  = 254 nm, CH<sub>3</sub>OH /i-PrOH =50:50, flow rate: 0.7 mL/min, 25 °C, tr(minor) = 25.91 min, tr(major) = 8.11min). [ $\alpha$ ]<sub>D</sub> = -57.1557(c 1.0, CHCl<sub>3</sub>).

<sup>1</sup>H NMR (400 MHz, Chloroform-*d*)  $\delta$  7.78 (t, *J* = 1.8 Hz, 1H), 7.56 (dd, *J* = 8.0, 1.4 Hz, 1H), 7.42 (d, *J* = 7.8 Hz, 1H), 7.20 – 7.12 (m, 3H), 7.08 – 6.98 (m, 3H), 6.94 (s, 1H), 6.75 (s, 1H), 5.82 – 5.64 (m, 1H), 5.00 – 4.91 (m, 1H), 4.84 (d, *J* = 7.8 Hz, 1H), 3.53 (s, 3H), 3.25 (q, *J* = 9.9 Hz, 1H), 3.05 (s, 1H), 2.53 (ddd, *J* = 16.7, 9.6, 4.8 Hz, 1H), 2.22 (s, 1H).

<sup>13</sup>C NMR (125 MHz, Chloroform-*d*)  $\delta$  186.84 , 168.88 , 142.51 , 136.86 , 135.16 , 133.96 , 130.55 , 129.25 , 129.18 , 128.48 , 128.44 , 126.91 , 125.80 , 94.90 , 70.10 , 65.84 , 55.11 , 44.85 , 35.48 , 34.17 .

HRMS (ESI, *m/z*) calcd for C<sub>23</sub>H<sub>21</sub>N<sub>4</sub>O<sub>2</sub>NaI [M+Na]<sup>+</sup>: 535.0620, found: 535.0601.

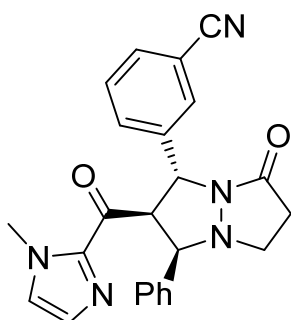

4m

Following General Procedure, A dried 25 mL Schlenk tube was charged with chiral catalyst Fe-BPsalan (5.0 mol%) and add silver salt (5.0 mol% AgSbF<sub>6</sub>) to the glove box. Then the tube was purged with argon and anhydrous DCE (2 mL) was added. Stir at room temperature for 30 minutes.  $\alpha,\beta$ -unsaturated 1-acylimidazoles 2m (51.45 mg, 0.20 mmol) was add continue stirring at room temperature for 30 minutes, finally N,N'-cyclic azomethine imines 3a (41.81 mg, 0.24 mmol) was added. The reaction mixture was stirred at room temperature for indicated time (monitored by TLC) under argon. The mixture was purified by flash column chromatography on silica gel (petroleum ether/ EtOAc = 1:2, basified with 1.0% Et<sub>3</sub>N) to afford chiral product 4m as white foamed solid (57.7 mg, yield: 70%, dr > 99:1), the dr value was determined by crude <sup>1</sup>H NMR analysis. Enantiomeric excess was determined by HPLC analysis, *ee* = 97% (Chiralpak column IG,  $\lambda$  = 254 nm, CH<sub>3</sub>OH/*i*-PrOH = 90:10, flow rate: 0.5 mL/min, 25°C, tr(minor) = 21.96 min, tr(major) = 12.95 min). [ $\alpha$ ]<sub>D</sub> = -71.6221 (c 1.0, CHCl<sub>3</sub>).

<sup>1</sup>H NMR (400 MHz, Chloroform-*d*)  $\delta$  7.76 (d, *J* = 1.8 Hz, 1H), 7.69 (d, *J* = 8.0 Hz, 1H), 7.54 (d, *J* = 7.7 Hz, 1H), 7.43 (t, *J* = 7.8 Hz, 1H), 7.19 (dd, *J* = 6.5, 3.7 Hz, 3H), 7.05 – 6.98 (m, 2H), 6.96 (s, 1H), 6.79 (s, 1H), 5.85 (d, *J* = 6.0 Hz, 1H), 4.90 (d, *J* = 5.9 Hz, 2H), 3.56 (s, 3H), 3.30 (q, *J* = 10.0 Hz, 1H), 3.08 (td, *J* = 10.7, 4.8 Hz, 1H), 2.58 – 2.47 (m, 1H), 2.18 (s, 1H).

<sup>13</sup>C NMR (126 MHz, Chloroform-*d*)  $\delta$  186.60, 169.62, 142.43, 141.97, 133.83, 131.45, 131.00, 130.09, 129.75, 129.41, 129.26, 128.61, 127.08, 118.77, 112.97, 70.22, 65.87, 60.46, 55.16, 44.65, 35.53, 33.91, 21.14, 14.27.

HRMS (ESI,  $m/z$ ) calcd for  $C_{24}H_{21}N_5O_2Na$   $[M+Na]^+$ : 434.1583, found: 434.1587.

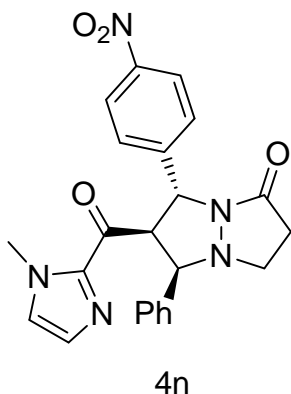

Following General Procedure, A dried 25 mL Schlenk tube was charged with chiral catalyst Fe-BPsalan (5.0 mol%) and add silver salt (5.0 mol%  $AgSbF_6$ ) in the glove box. Then the tube was purged with argon and anhydrous DCE (2 mL) was added. Stir at room temperature for 30 minutes.  $\alpha,\beta$ -unsaturated 1-acylimidazoles 2n (51.45 mg, 0.20 mmol) was add continue stirring at room temperature for 30 minutes, finally  $N,N'$ -cyclic azomethine imines 3a (41.81 mg, 0.24 mmol) was added. The reaction mixture was stirred at room temperature for indicated time (monitored by TLC) under argon. The mixture was purified by flash column chromatography on silica gel (petroleum ether/ EtOAc = 1:2, basified with 1.0%  $Et_3N$ ) to afford chiral product 4n as yellow foamed solid (34.5 mg, yield: 40%,  $dr > 20:1$ ), the  $dr$  value was determined by crude  $^1H$  NMR analysis. Enantiomeric excess was determined by HPLC analysis,  $ee = 90\%$  (Chiralpak column IG,  $\lambda = 254$  nm,  $CH_3OH/i$ -PrOH = 90:10, flow rate: 0.5 mL/min, 25 °C,  $t_r(\text{minor}) = 56.48$  min,  $t_r(\text{major}) = 20.59$  min).  $[\alpha]_D = -49.7906$  (c 1.0,  $CHCl_3$ ).

$^1H$  NMR (400 MHz, Chloroform- $d$ )  $\delta$  8.24 – 8.12 (m, 2H), 7.68 – 7.61 (m, 2H), 7.24 – 7.17 (m, 3H), 7.08 – 6.93 (m, 3H), 6.79 (s, 1H), 5.94 (d,  $J = 6.3$  Hz, 1H), 5.05 – 4.85 (m, 2H), 3.57 (s, 3H), 3.37 – 3.25 (m, 1H), 3.10 (s, 1H), 2.55 (ddd,  $J = 15.5, 9.8, 4.9$  Hz, 1H), 2.20 (t,  $J = 7.5$  Hz, 1H).

$^{13}\text{C}$  NMR (125 MHz, Chloroform-*d*)  $\delta$  186.44 , 169.66 , 147.45 , 142.35 , 133.72 , 129.39 , 129.21 , 128.60 , 127.35 , 127.03 , 124.18 , 70.16 , 65.70 , 60.43 , 55.31 , 44.67 , 35.49 , 33.86 , 14.22 .

HRMS (ESI, *m/z*) calcd for  $\text{C}_{23}\text{H}_{21}\text{N}_5\text{O}_4\text{Na}$   $[\text{M}+\text{Na}]^+$ : 454.1492, found: 454.1486.

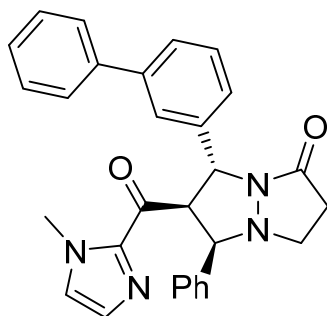

4o

Following General Procedure, A dried 25 mL Schlenk tube was charged with chiral catalyst Fe-BPsalan (5.0 mol%) and silver salt (5.0 mol%  $\text{AgSbF}_6$ ) to the glove box. Then the tube was purged with argon and anhydrous DCE (2 mL) was added. Stir at room temperature for 30 minutes.  $\alpha,\beta$ -unsaturated 1-acylimidazoles 2o (56.67 mg, 0.20 mmol) was added continue stirring at room temperature for 30 minutes, finally  $\text{N},\text{N}'$ -cyclic azomethine imines 3a (41.81 mg, 0.24 mmol) was added. The reaction mixture was stirred at room temperature for indicated time (monitored by TLC) under argon. The mixture was purified by flash column chromatography on silica gel (petroleum ether/ EtOAc = 1:2, basified with 1.0%  $\text{Et}_3\text{N}$ ) to afford chiral product 4o as white foamed solid (85 mg, yield: 92%, dr>80:1), the dr value was determined by crude  $^1\text{H}$  NMR analysis. Enantiomeric excess was determined by HPLC analysis, *ee* = 97% (Chiralpak column IG,  $\lambda$  = 254 nm,  $\text{CH}_3\text{OH}/i\text{-PrOH}$  = 90:10, flow rate: 0.5 mL/min, 25°C,  $t_r(\text{minor})$  = 27.40 min,  $t_r(\text{major})$  = 18.49 min).  $[\alpha]_D = -53.8854$  (c 1.0,  $\text{CHCl}_3$ ).

$^1\text{H}$  NMR (400 MHz, Chloroform-*d*)  $\delta$  7.67 (s, 1H), 7.58 (d,  $J$  = 6.9 Hz, 2H), 7.50 – 7.38 (m, 5H), 7.32 (t,  $J$  = 7.4 Hz, 1H), 7.18 (d,  $J$  = 6.4 Hz, 3H), 7.07 (d,  $J$  = 7.6 Hz,

2H), 6.93 (s, 1H), 6.73 (s, 1H), 5.88 (d,  $J = 6.3$  Hz, 1H), 5.12 – 5.04 (m, 1H), 4.86 (d,  $J = 7.7$  Hz, 1H), 3.53 (s, 3H), 3.24 (q,  $J = 9.8$  Hz, 1H), 3.11 (s, 1H), 2.64 – 2.54 (m, 1H), 2.34 (s, 1H).

$^{13}\text{C}$  NMR (125 MHz, Chloroform-*d*)  $\delta$  187.22 , 168.19 , 142.62 , 141.82 , 141.09 , 140.52 , 134.10 , 129.28 , 129.12 , 128.68 , 128.38 , 128.32 , 127.32 , 127.29 , 126.81 , 126.64 , 125.23 , 70.08 , 65.90 , 55.90 , 45.29 , 35.41 , 34.51 .

HRMS (ESI,  $m/z$ ) calcd for  $\text{C}_{29}\text{H}_{27}\text{N}_4\text{O}_2$   $[\text{M}+\text{H}]^+$ : 463.2122, found: 463.2129.

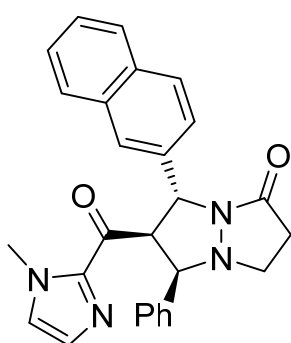

4p

Following General Procedure, A dried 25 mL Schlenk tube was charged with chiral catalyst Fe-BPsalan (5.0 mol%) and add silver salt (5.0 mol%  $\text{AgSbF}_6$ ) in the glove box. Then the tube was purged with argon and anhydrous DCE (2 mL) was added. Stir at room temperature for 30 minutes.  $\alpha,\beta$ -unsaturated 1-acylimidazoles 2p (52.46 mg, 0.20 mmol) was add continue stirring at room temperature for 30 minutes, finally  $\text{N,N}'$ -cyclic azomethine imines 3a (41.81 mg, 0.24 mmol) was added. The reaction mixture was stirred at room temperature for indicated time (monitored by TLC) under argon. The mixture was purified by flash column chromatography on silica gel (petroleum ether/ EtOAc = 1:2, basified with 1.0%  $\text{Et}_3\text{N}$ ) to afford chiral product 4p as white foamed solid (83.7 mg, yield: 96%, dr>50:1), the dr value was determined by crude  $^1\text{H}$  NMR analysis. Enantiomeric excess was determined by HPLC analysis,  $ee = 97\%$  (Chiralpak column IG,  $\lambda = 254$  nm,  $\text{CH}_3\text{OH}/i\text{-PrOH} = 90:10$ , flow rate: 0.5 mL/min, 25 °C,  $\text{tr}(\text{minor}) = 45.40$  min,  $\text{tr}(\text{major}) = 18.30$ min).

$[\alpha]_D = -62.8942$  (c 1.0,  $\text{CHCl}_3$ ).

$^1\text{H}$  NMR (400 MHz, Chloroform-*d*)  $\delta$  7.92 (s, 1H), 7.86 – 7.76 (m, 3H), 7.62 (d,  $J = 8.5$  Hz, 1H), 7.47 – 7.38 (m, 2H), 7.19 (d,  $J = 7.0$  Hz, 3H), 7.13 – 7.06 (m, 2H), 6.92 (s, 1H), 6.72 (s, 1H), 5.97 (d,  $J = 6.2$  Hz, 1H), 5.17 – 5.09 (m, 1H), 4.89 (d,  $J = 7.9$  Hz, 1H), 3.54 (s, 3H), 3.28 (q,  $J = 10.0$  Hz, 1H), 3.14 (s, 1H), 2.62 (ddd,  $J = 16.6, 9.4, 4.8$  Hz, 1H), 2.36 (s, 1H).

$^{13}\text{C}$  NMR (125 MHz, Chloroform-*d*)  $\delta$  187.23 , 168.20 , 142.62 , 137.23 , 134.15 , 133.33 , 133.00 , 129.13 , 128.93 , 128.38 , 128.33 , 128.03 , 127.64 , 126.82 , 126.16 , 125.93 , 125.48 , 124.15 , 70.23 , 65.70 , 56.11 , 45.39 , 35.41 , 34.57 .

HRMS (ESI,  $m/z$ ) calcd for  $\text{C}_{27}\text{H}_{25}\text{N}_4\text{O}_2$   $[\text{M}+\text{H}]^+$ : 437.1978, found: 437.1972.

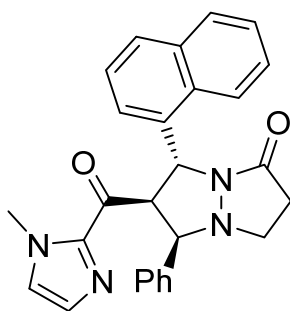

4q

Following General Procedure, A dried 25 mL Schlenk tube was charged with chiral catalyst Fe-BPsalan (5.0 mol%) and silver salt (5.0 mol%  $\text{AgSbF}_6$ ) in the glove box. Then the tube was purged with argon and anhydrous DCE (2 mL) was added. Stir at room temperature for 30 minutes.  $\alpha,\beta$ -unsaturated 1-acylimidazoles 2q (52.46mg, 0.20 mmol) was add continue stirring at room temperature for 30 minutes, finally  $\text{N,N}'$ -cyclic azomethine imines 3a (41.81 mg, 0.24 mmol) was added. The reaction mixture was stirred at room temperature for indicated time (monitored by TLC) under argon. The mixture was purified by flash column chromatography on silica gel (petroleum ether/ EtOAc = 1:2, basified with 1.0%  $\text{Et}_3\text{N}$ ) to afford chiral product 4q as pale yellow foamed solid (78.9 mg, yield: 91%,  $\text{dr} > 70:1$ ), the  $\text{dr}$  value was determined by crude  $^1\text{H}$  NMR analysis. Enantiomeric excess was determined by HPLC analysis,  $ee = 95\%$  (Chiralpak column IG,  $\lambda = 254$  nm,  $\text{CH}_3\text{OH}/i\text{-PrOH}$



=90:10, flow rate: 0.5 mL/min, 25 °C, tr(minor) = 45.37 min, tr(major) = 18.40min).

$[\alpha]_D = -53.1880$ (c 1.0, CHCl<sub>3</sub>).

<sup>1</sup>H NMR (400 MHz, Chloroform-*d*)  $\delta$  7.92 (s, 1H), 7.87 – 7.76 (m, 3H), 7.62 (d,  $J = 8.5$  Hz, 1H), 7.49 – 7.37 (m, 2H), 7.19 (d,  $J = 6.7$  Hz, 3H), 7.09 (dd,  $J = 7.3, 2.2$  Hz, 2H), 6.92 (s, 1H), 6.72 (s, 1H), 5.97 (d,  $J = 6.2$  Hz, 1H), 5.20 – 5.07 (m, 1H), 4.89 (d,  $J = 7.9$  Hz, 1H), 3.54 (s, 3H), 3.28 (q,  $J = 9.7, 9.2$  Hz, 1H), 3.14 (s, 1H), 2.62 (ddd,  $J = 16.6, 9.4, 4.8$  Hz, 1H), 2.36 (s, 1H).

<sup>13</sup>C NMR (125 MHz, Chloroform-*d*)  $\delta$  187.31 , 168.23 , 142.70 , 137.25 , 134.22 , 133.39 , 133.06 , 129.18 , 128.98 , 128.43 , 128.37 , 128.09 , 127.68 , 126.83 , 126.21 , 125.97 , 125.55 , 124.19 , 70.28 , 65.75 , 56.17 , 45.48 , 35.48 , 34.64 .

HRMS (ESI,  $m/z$ ) calcd for C<sub>27</sub>H<sub>25</sub>N<sub>4</sub>O<sub>2</sub> [M+H]<sup>+</sup>: 437.1964, found: 437.1972.

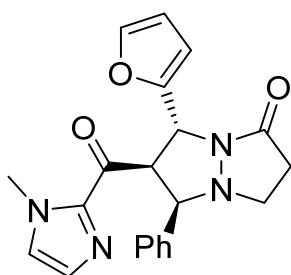

4r

Following General Procedure, A dried 25 mL Schlenk tube was charged with chiral catalyst Fe-BPsalan (5.0 mol%) and silver salt (5.0 mol% AgSbF<sub>6</sub>) in the glove box. Then the tube was purged with argon and anhydrous DCE (2 mL) was added. Stir at room temperature for 30 minutes.  $\alpha,\beta$ -unsaturated 1-acylimidazoles 2r (40.44 mg, 0.20 mmol) was add continue stirring at room temperature for 30 minutes, finally N,N'-cyclic azomethine imines 3a (41.81 mg, 0.24 mmol) was added. The reaction mixture was stirred at room temperature for indicated time (monitored by TLC) under argon. The mixture was purified by flash column chromatography on silica gel (petroleum ether/ EtOAc = 1:2, basified with 1.0% Et<sub>3</sub>N) to afford chiral product 4r as pale yellow foamed solid (18.4 mg, yield: 25%, dr>30:1), the dr value was determined by crude <sup>1</sup>H NMR analysis. Enantiomeric excess was determined by

HPLC analysis, *ee* = 88% (Chiralpak column IA,  $\lambda$  = 254 nm, CH<sub>3</sub>OH/*i*-PrOH = 90:10, flow rate: 0.5 mL/min, 25 °C, tr(minor) = 36.18 min, tr(major) = 17.69min).  
[ $\alpha$ ]<sub>D</sub> = - 15.36 (c 1.0, CHCl<sub>3</sub>).

<sup>1</sup>H NMR (400 MHz, Chloroform-*d*)  $\delta$  7.46 – 7.39 (m, 1H), 7.18 – 7.07 (m, 5H), 6.90 (s, 1H), 6.73 (s, 1H), 6.45 (d, *J* = 3.2 Hz, 1H), 6.39 – 6.26 (m, 1H), 5.76 – 5.45 (m, 1H), 5.32 (dd, *J* = 7.8, 4.6 Hz, 1H), 4.66 (s, 1H), 3.60 (s, 3H), 3.28 (s, 1H), 3.02 (d, *J* = 11.0 Hz, 1H), 2.60 (s, 2H).

<sup>13</sup>C NMR (125 MHz, Chloroform-*d*)  $\delta$  187.79 , 166.60 , 150.13 , 142.97 , 142.89 , 133.97 , 129.24 , 128.60 , 128.33 , 128.24 , 126.97 , 110.63 , 109.00 , 70.96 , 61.17 , 50.40 , 48.13 , 35.68 , 35.42 .

HRMS (ESI, *m/z*) calcd for C<sub>21</sub>H<sub>20</sub>N<sub>4</sub>O<sub>3</sub>Na [M+Na]<sup>+</sup>: 399.1432, found: 399.1428.

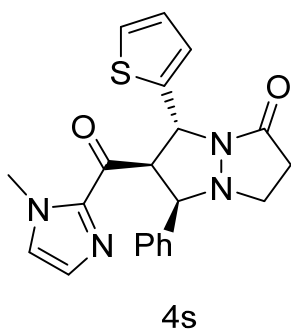

Following General Procedure, A dried 25 mL Schlenk tube was charged with chiral catalyst Fe-BPsalan (5.0 mol%) and silver salt (5.0 mol% AgSbF<sub>6</sub>) in the glove box. Then the tube was purged with argon and anhydrous DCE (2 mL) was added. Stir at room temperature for 30 minutes.  $\alpha,\beta$ -unsaturated 1-acylimidazoles 2s(43.65 mg, 0.20 mmol) was add continue stirring at room temperature for 30 minutes, finally N,N'-cyclic azomethine imines 3a (41.81 mg, 0.24 mmol) was added. The reaction mixture was stirred at room temperature for indicated time (monitored by TLC) under argon. The mixture was purified by flash column chromatography on silica gel (petroleum ether/ EtOAc = 1:2, basified with 1.0% Et<sub>3</sub>N) to afford chiral product 4s as pale yellow foamed solid (25.9 mg, yield: 33%, dr>20:1), the dr value was

determined by crude  $^1\text{H}$  NMR analysis. Enantiomeric excess was determined by HPLC analysis, ee = 94% (Chiralpak column IA,  $\lambda = 254$  nm,  $\text{CH}_3\text{OH}/i\text{-PrOH} = 90:10$ , flow rate: 0.5 mL/min, 25 °C,  $t_r(\text{minor}) = 36.18$  min,  $t_r(\text{major}) = 17.69$  min).  $[\alpha]_D = -16.93$  (c 1.0,  $\text{CHCl}_3$ ).

$^1\text{H}$  NMR (400 MHz, Chloroform-*d*)  $\delta$  7.26 – 7.22 (m, 1H), 7.20 – 7.07 (m, 6H), 7.05 – 6.86 (m, 2H), 6.75 (s, 1H), 5.96 (s, 1H), 5.16 (dd,  $J = 7.7, 5.3$  Hz, 1H), 4.74 (s, 1H), 3.60 (s, 3H), 3.26 – 3.03 (m, 2H), 2.64 – 2.38 (m, 2H).

$^{13}\text{C}$  NMR (125 MHz, Chloroform-*d*)  $\delta$  187.41, 167.51, 143.02, 142.77, 133.86, 129.29, 128.88, 128.41, 128.39, 127.07, 126.95, 125.67, 125.30, 70.46, 65.58, 52.44, 46.80, 35.64, 35.08.

HRMS (ESI,  $m/z$ ) calcd for  $\text{C}_{21}\text{H}_{20}\text{N}_4\text{O}_3\text{Na}$   $[\text{M}+\text{Na}]^+$ : 415.1199, found: 415.1199.

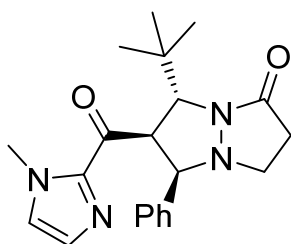

4t

Following General Procedure, A dried 25 mL Schlenk tube was charged with chiral catalyst Fe-BPsalan (5.0 mol%) and add silver salt (5.0 mol%  $\text{AgSbF}_6$ ) in the glove box. Then the tube was purged with argon and anhydrous DCE (2 mL) was added. Stir at room temperature for 30 minutes.  $\alpha,\beta$ -unsaturated 1-acylimidazoles 2t (38.45 mg, 0.20 mmol) was add continue stirring at room temperature for 30 minutes, finally  $\text{N,N}'$ -cyclic azomethine imines 3a (41.81 mg, 0.24 mmol) was added. The reaction mixture was stirred at room temperature for indicated time (monitored by TLC) under argon. The mixture was purified by flash column chromatography on silica gel (petroleum ether/ EtOAc = 1:2, basified with 1.0%  $\text{Et}_3\text{N}$ ) to afford chiral product 4t as white solid (41.8 mg, yield: 57%, dr > 20:1), the dr value was determined

by crude  $^1\text{H}$  NMR analysis. Enantiomeric excess was determined by HPLC analysis, ee = 95 % (Chiralpak column IA,  $\lambda$  = 254 nm,  $\text{CH}_3\text{OH}/i\text{-PrOH}/\text{DEA}$  = 90:10:0.1 , flow rate: 0.5 mL/min, 25  $^\circ\text{C}$ ,  $t_r(\text{minor})$  = 10.06 min,  $t_r(\text{major})$  = 9.07 min).  $[\alpha]_{\text{D}} = -72.9546$  (c 1.0,  $\text{CHCl}_3$ ).

$^1\text{H}$  NMR (400 MHz, Chloroform-*d*)  $\delta$  7.16 – 7.10 (m, 3H), 7.00 (s, 1H), 6.90 – 6.83 (m, 2H), 6.75 (s, 1H), 4.79 (d,  $J$  = 5.1 Hz, 2H), 4.70 (d,  $J$  = 3.1 Hz, 1H), 3.42 (s, 3H), 3.38 – 3.29 (m, 1H), 2.88 – 2.77 (m, 1H), 2.16 (ddd,  $J$  = 17.3, 10.4, 3.6 Hz, 1H), 1.66 – 1.54 (m, 1H), 1.01 (s, 9H).

$^{13}\text{C}$  NMR (125 MHz, Chloroform-*d*)  $\delta$  187.82 , 174.12 , 142.83 , 134.88 , 130.04 , 128.99 , 128.46 , 128.27 , 126.46 , 70.55 , 61.72 , 57.25 , 41.59 , 35.27 , 32.51 , 26.69 .

HRMS (ESI,  $m/z$ ) calcd for  $\text{C}_{21}\text{H}_{26}\text{N}_4\text{O}_2\text{Na}$   $[\text{M} + \text{Na}]^+$ : 389.1952, found: 389.1948.

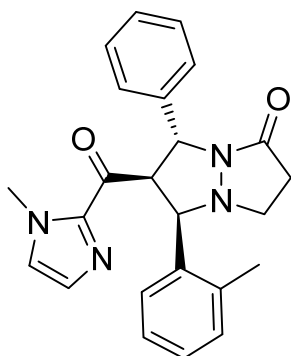

5a

Following General Procedure, A dried 25 mL Schlenk tube was charged with chiral catalyst Fe-BPsalan (5.0 mol%) and added silver salt (5.0 mol%  $\text{AgSbF}_6$ ) in the glove box. Then the tube was purged with argon and anhydrous DCE (2 mL) was added and stirred at room temperature for 30 minutes.  $\alpha,\beta$ -unsaturated 1-acylimidazoles **2a** (42.45 mg, 0.20 mmol) was added and the mixture was further stirred at room temperature for 30 minutes, finally  $N,N'$ -cyclic azomethine imines **3a'** (45.18 mg, 0.24 mmol) was added. The reaction mixture was stirred at room temperature for indicated time (monitored by TLC) under argon. The mixture was

purified by flash column chromatography on silica gel (petroleum ether/ EtOAc = 1:2, basified with 1.0% Et<sub>3</sub>N) to afford chiral product **5a** as white foamed solid (75.7mg, yield: 95%, dr>99:1), the dr value was determined by crude <sup>1</sup>H NMR analysis. Enantiomeric excess was determined by HPLC analysis, *ee* = 92% (Chiralpak column IG, λ = 254 nm, CH<sub>3</sub>OH/*i*-PrOH =90:10, flow rate: 0.5 mL/min, 25 °C, tr(minor) = 20.80 min, tr(major) = 14.07min). [α]<sub>D</sub> = 22.92 (c 1.0, CHCl<sub>3</sub>).

<sup>1</sup>H NMR (400 MHz, Chloroform-*d*) δ 7.42 (d, *J* = 7.1 Hz, 2H), 7.33 (t, *J* = 7.6 Hz, 2H), 7.27 – 7.24 (m, 1H), 7.22 – 7.15 (m, 1H), 7.07 – 7.01 (m, 1H), 6.97 (td, *J* = 7.5, 1.5 Hz, 1H), 6.88 (d, *J* = 7.5 Hz, 1H), 6.81 (s, 1H), 6.68 (s, 1H), 5.60 (s, 1H), 5.06 (dd, *J* = 7.8, 4.7 Hz, 1H), 4.87 (s, 1H), 3.53 (s, 3H), 3.08 (d, *J* = 74.1 Hz, 2H), 2.60 (s, 2H), 2.26 (s, 3H).

<sup>13</sup>C NMR (125 MHz, Chloroform-*d*) δ 188.19 , 166.10 , 142.94 , 139.38 , 137.77 , 131.92 , 130.47 , 128.95 , 128.84 , 127.87 , 127.00 , 126.83 , 126.46 , 125.76 , 66.13 , 64.14 , 56.34 , 47.58 , 35.63 , 35.29 , 19.79 .

HRMS (ESI, *m/z*) calcd for C<sub>24</sub>H<sub>24</sub>N<sub>4</sub>O<sub>2</sub>Na [M+ Na]<sup>+</sup>: 423.1792, found: 423.1791.

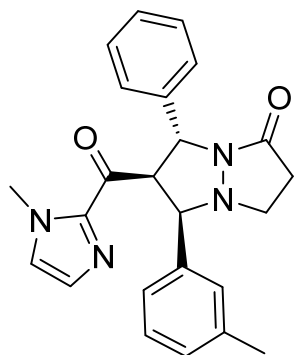

**5b**

Following General Procedure, A dried 25 mL Schlenk tube was charged with chiral catalyst Fe-BPsalan (5.0 mol%) and add silver salt (5.0 mol% AgSbF<sub>6</sub>) in the glove box. Then the tube was purged with argon and anhydrous DCE (2 mL) was added. Stir at room temperature for 30 minutes. *α,β*-unsaturated 1-acylimidazoles **2a**(42.4 5mg, 0.20 mmol) was add continue stirring at room temperature for 30

minutes, finally N,N'-cyclic azomethine imines 3b (45.18 mg, 0.24 mmol) was added. The reaction mixture was stirred at room temperature for indicated time (monitored by TLC) under argon. The mixture was purified by flash column chromatography on silica gel (petroleum ether/ EtOAc = 1:2, basified with 1.0% Et<sub>3</sub>N) to afford chiral product 5b as white foamed solid (73 mg, yield: 91%, dr>99:1), the dr value was determined by crude <sup>1</sup>H NMR analysis. Enantiomeric excess was determined by HPLC analysis, *ee* = 91% (Chiralpak column IG, λ = 254 nm, CH<sub>3</sub>OH/*i*-PrOH = 90:10, flow rate: 0.5 mL/min, 25 °C, tr(minor) = 26.90 min, tr(major) = 12.70min). [α]<sub>D</sub> = -39.20 (c 1.0, CHCl<sub>3</sub>).

<sup>1</sup>H NMR (400 MHz, Chloroform-*d*) δ 7.44 (d, *J* = 7.1 Hz, 2H), 7.32 (t, *J* = 7.6 Hz, 2H), 7.26 – 7.20 (m, 1H), 7.05 (t, *J* = 7.8 Hz, 1H), 6.93 (d, *J* = 13.8 Hz, 2H), 6.87 (d, *J* = 5.3 Hz, 2H), 6.74 (s, 1H), 5.82 – 5.64 (m, 1H), 5.02 (dd, *J* = 7.8, 5.9 Hz, 1H), 4.72 (s, 1H), 3.55 (s, 3H), 3.15 (d, *J* = 8.5 Hz, 2H), 2.58 (dt, *J* = 16.5, 6.8 Hz, 1H), 2.39 (d, *J* = 21.9 Hz, 1H), 2.21 (s, 3H).

<sup>13</sup>C NMR (125 MHz, Chloroform-*d*) δ 187.64 , 167.59 , 142.82 , 139.76 , 138.05 , 133.95 , 129.81 , 129.05 , 129.00 , 128.88 , 128.23 , 127.78 , 126.75 , 126.44 , 125.87 , 70.21 , 65.70 , 56.03 , 45.87,35.47 , 34.91 , 21.30 .

HRMS (ESI, *m/z*) calcd for C<sub>24</sub>H<sub>24</sub>N<sub>4</sub>O<sub>2</sub>Na [M+ Na]<sup>+</sup>: 423.1795, found: 423.1791.

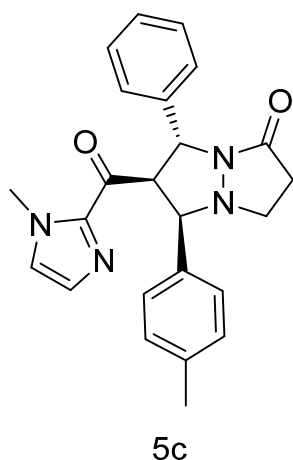

Following General Procedure, A dried 25 mL Schlenk tube was charged with chiral catalyst Fe-BPsalan (5.0 mol%) and silver salt (5.0 mol% AgSbF<sub>6</sub>) in the glove

box. Then the tube was purged with argon and anhydrous DCE (2 mL) was added. Stir at room temperature for 30 minutes.  $\alpha,\beta$ -unsaturated 1-acylimidazoles 2a (42.45 mg, 0.20 mmol) was added continue stirring at room temperature for 30 minutes, finally  $N,N'$ -cyclic azomethine imines 3c(45.18 mg, 0.24 mmol) was added. The reaction mixture was stirred at room temperature for indicated time (monitored by TLC) under argon. The mixture was purified by flash column chromatography on silica gel (petroleum ether/ EtOAc = 1:2, basified with 1.0% Et<sub>3</sub>N) to afford chiral product 5c as white foamed solid (74.5mg, yield: 93%, dr>30:1), the dr value was determined by crude <sup>1</sup>H NMR analysis. Enantiomeric excess was determined by HPLC analysis, *ee* = 92% (Chiralpak column IG,  $\lambda$  = 254 nm, CH<sub>3</sub>OH/*i*-PrOH =90:10, flow rate: 0.5 mL/min, 25 °C, tr(minor) = 23.25 min, tr(major) = 13.55min). [ $\alpha$ ]<sub>D</sub> = -76.52 (c 1.0, CHCl<sub>3</sub>).

<sup>1</sup>H NMR (400 MHz, Chloroform-*d*)  $\delta$  7.47 (d, *J* = 7.4 Hz, 2H), 7.32 (dd, *J* = 15.4, 7.6 Hz, 2H), 7.23 (d, *J* = 7.1 Hz, 1H), 7.00 (d, *J* = 7.9 Hz, 2H), 6.95 (d, *J* = 7.8 Hz, 3H), 6.78 (s, 1H), 5.82 (d, *J* = 6.3 Hz, 1H), 5.06 – 4.97 (m, 1H), 4.85 (d, *J* = 7.6 Hz, 1H), 3.58 (s, 3H), 3.24 (q, *J* = 9.8 Hz, 1H), 3.14 – 3.01 (m, 1H), 2.56 (ddd, *J* = 14.7, 9.5, 4.9 Hz, 1H), 2.24 (s, 4H). <sup>13</sup>C NMR (125 MHz, Chloroform-*d*)  $\delta$  187.31 , 168.52 , 142.66 , 140.13 , 138.09 , 130.89 , 129.12 , 129.08 , 128.80 , 127.65 , 126.74 , 126.31 , 69.84 , 65.83 , 55.84 , 44.90 , 35.47 , 34.35 , 21.06 .

HRMS (ESI, *m/z*) calcd for C<sub>24</sub>H<sub>24</sub>N<sub>4</sub>O<sub>2</sub>Na [M+ Na]<sup>+</sup>: 423.1795, found: 423.1792.

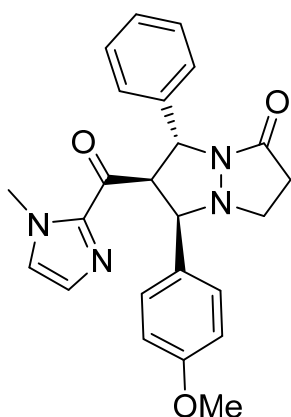

5d

Following General Procedure, A dried 25 mL Schlenk tube was charged with chiral catalyst Fe-BPsalan (5.0 mol%) and silver salt (5.0 mol% AgSbF<sub>6</sub>) in the glove box. Then the tube was purged with argon and anhydrous DCE (2 mL) was added. Stir at room temperature for 30 minutes.  $\alpha,\beta$ -unsaturated 1-acylimidazoles 2a (42.45 mg, 0.20 mmol) was add continue stirring at room temperature for 30 minutes, finally N,N'-cyclic azomethine imines 3d (49.01 mg, 0.24 mmol) was added. The reaction mixture was stirred at room temperature for indicated time (monitored by TLC) under argon. The mixture was purified by flash column chromatography on silica gel (petroleum ether/ EtOAc = 1:2, basified with 1.0% Et<sub>3</sub>N) to afford chiral product 5d as white foamed solid (46 mg, yield: 55%, dr>80:1), the dr value was determined by crude <sup>1</sup>H NMR analysis. Enantiomeric excess was determined by HPLC analysis, ee = 91% (Chiralpak column IG,  $\lambda$  = 254 nm, CH<sub>3</sub>OH/i-PrOH =90:10, flow rate: 0.5 mL/min, 25 °C, tr(minor) = 31.64 min, tr(major) = 13.74min). [ $\alpha$ ]<sub>D</sub> = -75.57 (c 1.0, CHCl<sub>3</sub>).

<sup>1</sup>H NMR (400 MHz, Chloroform-*d*)  $\delta$  8.06 – 7.94 (m, 2H), 7.45 – 7.41 (m, 2H), 7.35 (dd, *J* = 8.0, 6.5 Hz, 4H), 7.32 – 7.25 (m, 1H), 6.90 (s, 1H), 6.79 (s, 1H), 5.66 (d, *J* = 5.3 Hz, 1H), 5.13 – 5.05 (m, 1H), 4.83 (s, 1H), 3.65 (s, 3H), 3.15 (t, *J* = 8.8 Hz, 2H), 2.72 – 2.51 (m, 2H).



$^{13}\text{C}$  NMR (125 MHz, Chloroform-*d*)  $\delta$  186.78 , 166.27 , 147.65 , 142.29 , 142.11 , 138.79 , 129.90 , 129.50 , 129.04 , 128.16 , 127.54 , 126.55 , 123.26 , 69.53 , 65.43 , 56.28 , 47.18 , 35.89 , 35.37 .

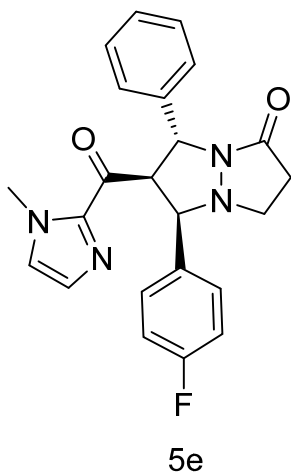

Following General Procedure, A dried 25 mL Schlenk tube was charged with chiral catalyst Fe-BPsalan (5.0 mol%) and silver salt (5.0 mol%  $\text{AgSbF}_6$ ) in the glove box. Then the tube was purged with argon and anhydrous DCE (2 mL) was added. Stir at room temperature for 30 minutes.  $\alpha,\beta$ -unsaturated 1-acylimidazoles 2a (42.45 mg, 0.20 mmol) was add continue stirring at room temperature for 30 minutes, finally  $N,N'$ -cyclic azomethine imines 3e (46.13 mg, 0.24 mmol) was added. The reaction mixture was stirred at room temperature for indicated time (monitored by TLC) under argon. The mixture was purified by flash column chromatography on silica gel (petroleum ether/ EtOAc = 1:1, basified with 1.0%  $\text{Et}_3\text{N}$ ) to afford chiral product 5e as white foamed solid (72.4mg, yield: 90%, dr>99:1), the dr value was determined by crude  $^1\text{H}$  NMR analysis. Enantiomeric excess was determined by HPLC analysis, *ee* = 95% (Chiralpak column IG,  $\lambda$  = 254 nm,  $\text{CH}_3\text{OH}/i\text{-PrOH}$  =90:10, flow rate: 0.7 mL/min, 25 °C,  $t_r(\text{minor})$  = 18.49 min,  $t_r(\text{major})$  = 11.79min).  $[\alpha]_D = -36.94$  (c 1.0,  $\text{CHCl}_3$ ).

$^1\text{H}$  NMR (400 MHz, Chloroform-*d*)  $\delta$  7.43 (d,  $J$  = 7.3 Hz, 2H), 7.37 – 7.29 (m, 2H), 7.23 (d,  $J$  = 7.1 Hz, 1H), 7.06 (dd,  $J$  = 8.4, 5.4 Hz, 2H), 6.92 (s, 1H), 6.86 (t,  $J$  = 8.5 Hz, 2H), 6.78 (s, 1H), 5.72 (d,  $J$  = 6.0 Hz, 1H), 5.06 – 4.97 (m, 1H), 4.79 (s, 1H),

3.61 (s, 3H), 3.25 – 3.00 (m, 2H), 2.59 (ddd,  $J = 17.0, 9.2, 4.8$  Hz, 1H), 2.39 (s, 1H).  $^{13}\text{C}$  NMR (125 MHz, Chloroform- $d$ )  $\delta$  187.26 , 167.57 , 163.46 , 161.49 , 142.56 , 139.59 , 130.84 , 130.79 , 130.02 , 130.00 , 129.27 , 128.91 , 127.86 , 127.05 , 126.42 , 115.42 , 115.25 , 69.48 , 65.63 , 55.92 , 45.82 , 35.66 , 34.78 .

HRMS (ESI,  $m/z$ ) calcd for  $\text{C}_{23}\text{H}_{21}\text{N}_4\text{O}_2\text{FNa}$  [ $\text{M} + \text{Na}$ ] $^+$ : 427.1550, found: 427.1541.

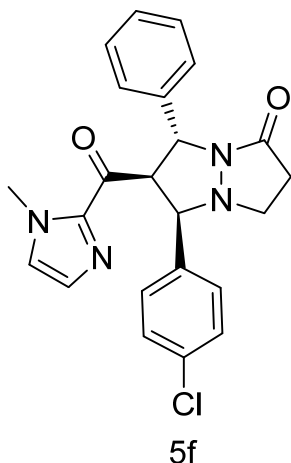

Following General Procedure, A dried 25 mL Schlenk tube was charged with chiral catalyst Fe-BPsalan (5.0 mol%) and silver salt (5.0 mol%  $\text{AgSbF}_6$ ) in the glove box. Then the tube was purged with argon and anhydrous DCE (2 mL) was added. Stir at room temperature for 30 minutes.  $\alpha,\beta$ -unsaturated 1-acylimidazoles 2a (42.45 mg, 0.20 mmol) was add continue stirring at room temperature for 30 minutes, finally  $\text{N,N}'$ -cyclic azomethine imines 3f (50.07 mg, 0.24 mmol) was added. The reaction mixture was stirred at room temperature for indicated time (monitored by TLC) under argon. The mixture was purified by flash column chromatography on silica gel (petroleum ether/ EtOAc = 1:2, basified with 1.0%  $\text{Et}_3\text{N}$ ) to afford chiral product 5f as white foamed solid (77.5mg, yield: 92%,  $\text{dr} > 30:1$ ), the  $\text{dr}$  value was determined by crude  $^1\text{H}$  NMR analysis. Enantiomeric excess was determined by HPLC analysis,  $ee = 93\%$  (Chiralpak column IG,  $\lambda = 254$  nm,  $\text{CH}_3\text{OH}/i\text{-PrOH} = 60:40$ , flow rate: 0.7 mL/min, 25 °C,  $\text{tr}(\text{minor}) = 23.49$  min,  $\text{tr}(\text{major}) = 10.89$ min).  $[\alpha]_{\text{D}} = -74.62$  (c 1.0,  $\text{CHCl}_3$ ).

$^1\text{H}$  NMR (400 MHz, Chloroform-*d*)  $\delta$  7.46 – 7.40 (m, 2H), 7.32 (t,  $J = 7.5$  Hz, 2H), 7.25 (d,  $J = 6.3$  Hz, 1H), 7.14 (d,  $J = 8.5$  Hz, 2H), 7.02 (d,  $J = 8.3$  Hz, 2H), 6.93 (s, 1H), 6.79 (s, 1H), 5.71 (d,  $J = 5.8$  Hz, 1H), 5.05 – 4.96 (m, 1H), 4.78 (d,  $J = 8.0$  Hz, 1H), 3.62 (s, 3H), 3.24 – 3.03 (m, 2H), 2.59 (ddd,  $J = 16.7, 9.3, 4.7$  Hz, 1H), 2.40 (s, 1H).

$^{13}\text{C}$  NMR (125 MHz, Chloroform-*d*)  $\delta$  187.11 , 167.54 , 142.51 , 139.55 , 134.28 , 132.80 , 130.43 , 129.32 , 128.93 , 128.55 , 127.90 , 127.11 , 126.43 , 69.51 , 65.65 , 55.94 , 45.82 , 35.69 , 34.78 .

HRMS (ESI,  $m/z$ ) calcd for  $\text{C}_{23}\text{H}_{21}\text{N}_4\text{O}_2\text{ClNa}$   $[\text{M} + \text{Na}]^+$ : 443.1251, found: 443.1245.

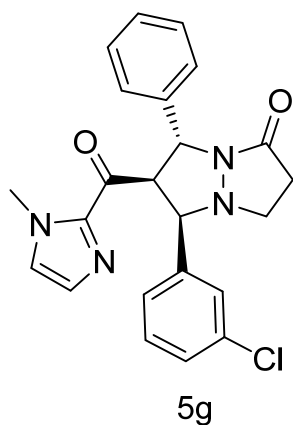

Following General Procedure, A dried 25 mL Schlenk tube was charged with chiral catalyst Fe-BPsalan (5.0 mol%) and silver salt (5.0 mol%  $\text{AgSbF}_6$ ) in the glove box. Then the tube was purged with argon and anhydrous DCE (2 mL) was added. Stir at room temperature for 30 minutes.  $\alpha,\beta$ -unsaturated 1-acylimidazoles 2a (42.45mg, 0.20 mmol) was add continue stirring at room temperature for 30 minutes, finally  $\text{N,N}'$ -cyclic azomethine imines 3g (50.07 mg, 0.24 mmol) was added. The reaction mixture was stirred at room temperature for indicated time (monitored by TLC) under argon. The mixture was purified by flash column chromatography on silica gel (petroleum ether/ EtOAc = 1:1, basified with 1.0%  $\text{Et}_3\text{N}$ ) to afford chiral product 5g as white foamed solid (75.8mg, yield: 90%, dr>99:1), the dr value was determined by crude  $^1\text{H}$  NMR analysis. Enantiomeric excess was determined by

HPLC analysis, *ee* = 96% (Chiralpak column IA,  $\lambda$  = 254 nm, CH<sub>3</sub>OH/*i*-PrOH =60:40, flow rate: 0.5 mL/min, 25 °C, *tr*(minor) = 41.91 min, *tr*(major) = 15.71min).  
[ $\alpha$ ]<sub>D</sub> = -28.21 (c 1.0, CHCl<sub>3</sub>).

<sup>1</sup>H NMR (400 MHz, Chloroform-*d*)  $\delta$  7.45 – 7.38 (m, 2H), 7.32 (t, *J* = 7.5 Hz, 2H), 7.26 – 7.22 (m, 1H), 7.09 (dd, *J* = 6.2, 3.5 Hz, 3H), 7.00 (dq, *J* = 4.7, 2.3, 1.8 Hz, 1H), 6.90 (s, 1H), 6.77 (s, 1H), 5.64 (d, *J* = 5.4 Hz, 1H), 5.02 (dd, *J* = 7.9, 5.4 Hz, 1H), 4.64 (d, *J* = 7.3 Hz, 1H), 3.63 (s, 3H), 3.25 – 3.03 (m, 2H), 2.68 – 2.45 (m, 2H).

<sup>13</sup>C NMR (125 MHz, Chloroform-*d*)  $\delta$  187.26 , 166.47 , 142.61 , 139.10 , 136.34 , 134.25 , 129.60 , 129.28 , 128.99 , 128.94 , 128.45 , 127.96 , 127.16 , 126.84 , 126.50 , 69.72 , 65.42 , 56.07 , 47.03 , 35.64 , 35.34 .

HRMS (ESI, *m/z*) calcd for C<sub>23</sub>H<sub>21</sub>N<sub>4</sub>O<sub>2</sub>ClNa [M+ Na]<sup>+</sup>: 443.1250, found: 443.1245.

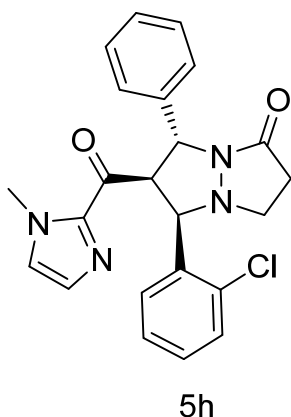

Following General Procedure, A dried 25 mL Schlenk tube was charged with chiral catalyst Fe-BPsalan (5.0 mol%) and silver salt (5.0 mol% AgSbF<sub>6</sub>) in the glove box. Then the tube was purged with argon and anhydrous DCE (2 mL) was added. Stir at room temperature for 30 minutes.  $\alpha,\beta$ -unsaturated 1-acylimidazoles 2a (42.45 mg, 0.20 mmol) was add continue stirring at room temperature for 30 minutes, finally N,N'-cyclic azomethine imines 3h (50.07 mg, 0.24 mmol) was added. The reaction mixture was stirred at room temperature for indicated time (monitored by TLC) under argon. The mixture was purified by flash column chromatography on silica gel (petroleum ether/ EtOAc = 1:1, basified with 1.0% Et<sub>3</sub>N) to afford chiral product 5h

as white foamed solid (82.5 mg, yield: 98%, dr>50:1), the dr value was determined by crude  $^1\text{H}$  NMR analysis. Enantiomeric excess was determined by HPLC analysis, ee = 96% (Chiralpak column IA,  $\lambda$  = 254 nm,  $\text{CH}_3\text{OH}/i\text{-PrOH}$  = 90:10, flow rate: 0.5 mL/min, 25 °C,  $t_r(\text{minor})$  = 17.53 min,  $t_r(\text{major})$  = 13.69 min).  $[\alpha]_D = 24.37$  (c 1.0,  $\text{CHCl}_3$ ).

$^1\text{H}$  NMR (400 MHz, Chloroform-*d*)  $\delta$  7.44 (d,  $J$  = 7.5 Hz, 2H), 7.33 (t,  $J$  = 7.6 Hz, 2H), 7.26 (d,  $J$  = 7.3 Hz, 2H), 7.18 – 7.02 (m, 3H), 6.88 (s, 1H), 6.73 (s, 1H), 5.61 (s, 1H), 5.24 (s, 1H), 5.14 – 5.04 (m, 1H), 3.61 (s, 3H), 3.24 (s, 1H), 3.09 (s, 1H), 2.57 (s, 2H).  $^{13}\text{C}$  NMR (125 MHz, Chloroform-*d*)  $\delta$  187.79 , 166.63 , 142.59 , 139.15 , 135.31 , 131.69 , 129.81 , 129.35 , 129.30 , 128.93 , 128.62 , 127.94 , 127.16 , 126.52 , 66.12 , 63.92 , 56.53 , 47.44 , 35.50 .

HRMS (ESI,  $m/z$ ) calcd for  $\text{C}_{23}\text{H}_{21}\text{N}_4\text{O}_2\text{ClNa}$   $[\text{M} + \text{Na}]^+$ : 443.1252, found: 443.1245.

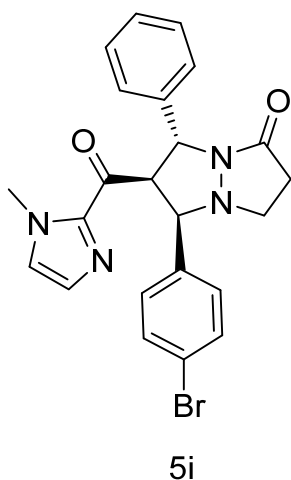

Following General Procedure, A dried 25 mL Schlenk tube was charged with chiral catalyst Fe-BPsalan (5.0 mol%) and silver salt (5.0 mol%  $\text{AgSbF}_6$ ) in the glove box. Then the tube was purged with argon and anhydrous DCE (2 mL) was added. Stir at room temperature for 30 minutes.  $\alpha,\beta$ -unsaturated 1-acylimidazoles 2a (42.45mg, 0.20 mmol) was added continue stirring at room temperature for 30 minutes, finally  $\text{N,N}'$ -cyclic azomethine imines 3i (60.74 mg, 0.24 mmol) was added. The reaction mixture was stirred at room temperature for indicated time (monitored

by TLC) under argon. The mixture was purified by flash column chromatography on silica gel (petroleum ether/ EtOAc = 1:1, basified with 1.0% Et<sub>3</sub>N) to afford chiral product 5i as white foamed solid (83.1mg, yield: 90%, dr>99:1), the dr value was determined by crude <sup>1</sup>H NMR analysis. Enantiomeric excess was determined by HPLC analysis, *ee* = 97% (Chiralpak column IA, λ = 254 nm, MeOH/*i*-PrOH =90:10, flow rate: 0.7 mL/min, 25 °C, tr(minor) = 24.28 min, tr(major) = 11.13min). [α]<sub>D</sub> = -84.83 (c 1.0, CHCl<sub>3</sub>).

<sup>1</sup>H NMR (400 MHz, Chloroform-*d*) δ 7.43 (d, *J* = 7.5 Hz, 2H), 7.31 (dd, *J* = 13.8, 7.9 Hz, 4H), 7.23 (d, *J* = 7.1 Hz, 1H), 6.99 – 6.90 (m, 3H), 6.80 (s, 1H), 5.71 (d, *J* = 5.9 Hz, 1H), 5.01 (dd, *J* = 7.8, 6.1 Hz, 1H), 4.84 – 4.69 (m, 1H), 3.61 (s, 3H), 3.17 (t, *J* = 9.7 Hz, 1H), 3.07 (s, 1H), 2.59 (ddd, *J* = 16.7, 9.3, 4.7 Hz, 1H), 2.41 (s, 1H).

<sup>13</sup>C NMR (125 MHz, Chloroform-*d*) δ 187.05 , 167.51 , 142.48 , 139.52 , 133.30 , 131.48 , 130.70 , 129.31 , 128.90 , 127.87 , 127.11 , 126.40 , 122.47 , 69.53 , 65.59 , 55.91 , 45.80 , 35.67 , 34.76 .

HRMS (ESI, *m/z*) calcd for C<sub>23</sub>H<sub>22</sub>N<sub>4</sub>O<sub>2</sub>Br [M+ H]<sup>+</sup>: 465.0920, found: 465.0921.

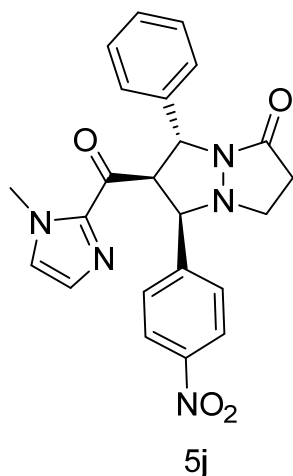

Following General Procedure, A dried 25 mL Schlenk tube was charged with chiral catalyst Fe-BPsalan (5.0 mol%) and silver salt (5.0 mol% AgSbF<sub>6</sub>) in the glove box. Then the tube was purged with argon and anhydrous DCE (2 mL) was added. Stir at room temperature for 30 minutes. *α,β*-unsaturated 1-acylimidazoles 2a (42.45 mg, 0.20 mmol) was add continue stirring at room temperature for 30 minutes, finally N,N'-cyclic azomethine imines 3j (52.61 mg, 0.24 mmol) was added. The reaction

mixture was stirred at room temperature for indicated time (monitored by TLC) under argon. The mixture was purified by flash column chromatography on silica gel (petroleum ether/ EtOAc = 1:1, basified with 1.0% Et<sub>3</sub>N) to afford chiral product 5j as yellow foamed solid (57.4 mg, yield: 67%, dr>30:1), the dr value was determined by crude <sup>1</sup>H NMR analysis. Enantiomeric excess was determined by HPLC analysis, *ee* = 95% (Chiralpak column IG, λ = 254 nm, CH<sub>3</sub>OH / *i*-PrOH = 90:10, flow rate: 0.5 mL/min, 25 °C, *tr*(minor) = 28.05 min, *tr*(major) = 12.61 min). [α]<sub>D</sub> = -87.17 (c 1.0, CHCl<sub>3</sub>).

HRMS (ESI, *m/z*) calcd for C<sub>23</sub>H<sub>21</sub>N<sub>5</sub>O<sub>4</sub>Na [M+ Na]<sup>+</sup>: 454.1489, found: 454.1486.

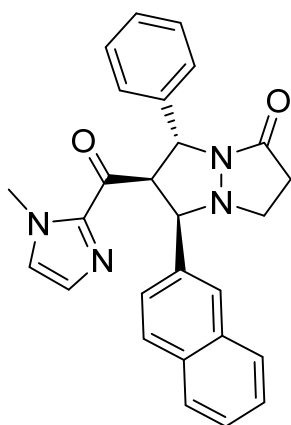

5k

Following General Procedure, A dried 25 mL Schlenk tube was charged with chiral catalyst Fe-BPsalan (5.0 mol%) and silver salt (5.0 mol% AgSbF<sub>6</sub>) in the glove box. Then the tube was purged with argon and anhydrous DCE (2 mL) was added. Stir at room temperature for 30 minutes. *α,β*-unsaturated 1-acylimidazoles 2a (42.45mg, 0.20 mmol) was added continue stirring at room temperature for 30 minutes, finally N,N'-cyclic azomethine imines 3k (53.82 mg, 0.24 mmol) was added. The reaction mixture was stirred at room temperature for indicated time (monitored by TLC) under argon. The mixture was purified by flash column chromatography on silica gel (petroleum ether/ EtOAc = 1:1, basified with 1.0%

Et<sub>3</sub>N) to afford chiral product 5k as pale yellow foamed solid (62.7 mg, yield: 72%, dr>99:1), the dr value was determined by crude <sup>1</sup>H NMR analysis. Enantiomeric excess was determined by HPLC analysis, *ee* = 93% (Chiralpak column IA, λ = 254 nm CH<sub>3</sub>OH/*i*-PrOH =90:10, flow rate: 0.7 mL/min, 25 °C, tr(minor) = 31.05 min, tr(major) = 12.65min). [α]<sub>D</sub> = -96.59 (c 1.0, CHCl<sub>3</sub>).

<sup>1</sup>H NMR (400 MHz, Chloroform-*d*) δ 7.75 – 7.65 (m, 2H), 7.61 (d, *J* = 8.5 Hz, 1H), 7.55 (s, 1H), 7.46 (d, *J* = 7.6 Hz, 2H), 7.41 (dd, *J* = 6.3, 3.2 Hz, 2H), 7.33 (t, *J* = 7.5 Hz, 2H), 7.23 (d, *J* = 7.6 Hz, 1H), 7.16 (dd, *J* = 8.6, 1.8 Hz, 1H), 6.85 (s, 1H), 6.57 (s, 1H), 5.82 (s, 1H), 5.09 (dd, *J* = 7.8, 5.9 Hz, 1H), 4.93 (s, 1H), 3.38 (s, 3H), 3.17 (t, *J* = 10.1 Hz, 2H), 2.56 (dt, *J* = 14.5, 6.9 Hz, 1H), 2.37 (s, 1H).

<sup>13</sup>C NMR (125 MHz, Chloroform-*d*) δ 187.46, 167.59, 142.68, 139.77, 132.90, 131.67, 129.13, 128.93, 128.43, 128.00, 127.86, 127.53, 126.84, 126.49, 126.44, 70.36, 65.85, 56.12, 46.08, 35.39, 34.91.

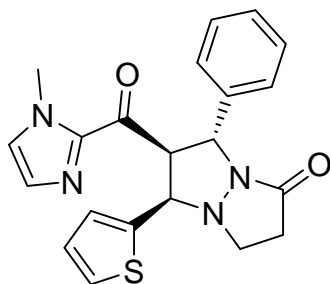

5l

Following General Procedure, A dried 25 mL Schlenk tube was charged with chiral catalyst Fe-BPsalan (5.0 mol%) and silver salt (5.0 mol% AgSbF<sub>6</sub>) in the glove box. Then the tube was purged with argon and anhydrous DCE (2 mL) was added. Stir at room temperature for 30 minutes. α,β-unsaturated 1-acylimidazoles 2a (42.45 mg, 0.20 mmol) was add continue stirring at room temperature for 30 minutes, finally N,N'-cyclic azomethine imines 3l (43.25 mg, 0.24 mmol) was added. The reaction mixture was stirred at room temperature for indicated time (monitored by TLC) under argon. The mixture was purified by flash column chromatography on silica gel (petroleum ether/ EtOAc = 1:1, basified with 1.0% Et<sub>3</sub>N) to afford chiral product 5l



as white crystal (22.4 mg, yield: 29%, dr>99:1), the dr value was determined by crude  $^1\text{H}$  NMR analysis. Enantiomeric excess was determined by HPLC analysis,  $ee = 84\%$  (Chiralpak column IG,  $\lambda = 254$  nm, MeOH/*i*-PrOH =90:10, flow rate: 0.5 mL/min, 25  $^\circ\text{C}$ ,  $\text{tr}(\text{minor}) = 28.05$  min,  $\text{tr}(\text{major}) = 12.61$ min).  $[\alpha]_{\text{D}} = -89.16$  (c 1.0,  $\text{CHCl}_3$ ).

$^1\text{H}$  NMR (400 MHz, Chloroform-*d*)  $\delta$  7.52 (d,  $J = 7.5$  Hz, 2H), 7.37 (t,  $J = 7.6$  Hz, 2H), 7.29 (d,  $J = 8.4$  Hz, 1H), 7.24 (d,  $J = 5.1$  Hz, 1H), 7.08 (s, 1H), 6.99 – 6.84 (m, 2H), 6.78 (d,  $J = 2.5$  Hz, 1H), 5.91 (d,  $J = 7.5$  Hz, 1H), 5.37 (d,  $J = 7.1$  Hz, 1H), 4.98 (t,  $J = 7.3$  Hz, 1H), 3.71 (s, 3H), 3.43 (q,  $J = 10.0$  Hz, 1H), 3.13 (q,  $J = 10.2$  Hz, 1H), 2.64 (ddd,  $J = 16.7, 10.3, 6.4$  Hz, 1H), 2.28 (s, 1H).  $^{13}\text{C}$  NMR (125 MHz, Chloroform-*d*)  $\delta$  186.15, 169.59, 142.58, 140.25, 135.37, 129.39, 128.92, 128.58, 127.77, 127.41, 126.94, 126.74, 126.40, 66.31, 64.97, 55.20, 43.63, 35.73, 33.85.

HRMS (ESI,  $m/z$ ) calcd for  $\text{C}_{21}\text{H}_{20}\text{N}_4\text{O}_2\text{NaS}$   $[\text{M} + \text{Na}]^+$ : 415.1200, found: 415.1199.

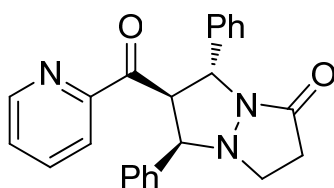

## 6

Following General Procedure, A dried 25 mL Schlenk tube was charged with chiral catalyst Fe-BPsalan (5.0 mol%) and silver salt (5.0 mol%  $\text{AgSbF}_6$ ) in the glove box. Then the tube was purged with argon and anhydrous DCE (2 mL) was added. Stir at room temperature for 30 minutes.  $\alpha,\beta$ -unsaturated 1-acylimidazoles (41.85 mg, 0.20 mmol) was add continue stirring at room temperature for 30 minutes, finally  $\text{N},\text{N}'$ -cyclic azomethine imines 3a (43.25 mg, 0.24 mmol) was added. The reaction mixture was stirred at room temperature for indicated time (monitored by TLC) under argon. The mixture was purified by flash column chromatography on silica gel (petroleum ether/ EtOAc = 1:1, basified with 1.0%  $\text{Et}_3\text{N}$ ) to afford chiral product 6 as a white foamed solid (57.2 mg, yield: 75%). m.p. 181-183  $^\circ\text{C}$

$^1\text{H}$  NMR (400 MHz,  $\text{CDCl}_3$ )  $\delta$  8.48 (d,  $J = 4.8$  Hz, 1H), 7.63–7.43 (m, 4H), 7.33 (t,  $J = 7.6$  Hz, 2H), 7.28 (s, 1H), 7.23 (d,  $J = 8.1$  Hz, 1H), 7.13–7.04 (m, 3H), 7.02–6.93 (m, 2H), 5.94 (d,  $J = 6.4$  Hz, 1H), 5.16 (t,  $J = 7.2$  Hz, 1H), 4.96 (s, 1H), 3.35–3.19 (m, 1H), 3.08–2.95 (m, 1H), 2.61–2.42 (m, 1H), 2.30–2.11 (m, 1H).

$^{13}\text{C}$  NMR (101 MHz,  $\text{CDCl}_3$ )  $\delta$  197.06, 168.97, 152.70, 148.56, 140.54, 136.68, 134.19, 129.34, 128.89, 128.59, 128.38, 127.67, 127.13, 126.30, 122.28, 69.74, 65.28, 56.39, 44.73, 34.21.

HRMS (ESI,  $m/z$ ) calcd for  $\text{C}_{24}\text{H}_{21}\text{N}_3\text{O}_2\text{Na}$   $[\text{M}+\text{Na}]^+$ : 406.1526, found: 406.1522.

HPLC: Chiralpak column AD-H,  $\lambda = 254$  nm, heptane/isopropanol 70:30; flow rate=0.7 ml/min; detection.  $t_r$  (major) = 13.09 min;  $t_r$  (minor) = 21.14 min (ee = 76%).

$[\alpha]_D^{27} = -114.1$  (c = 0.1425,  $\text{CHCl}_3$ )

## 5. $^1\text{H}$ NMR and $^{13}\text{C}$ NMR Spectra

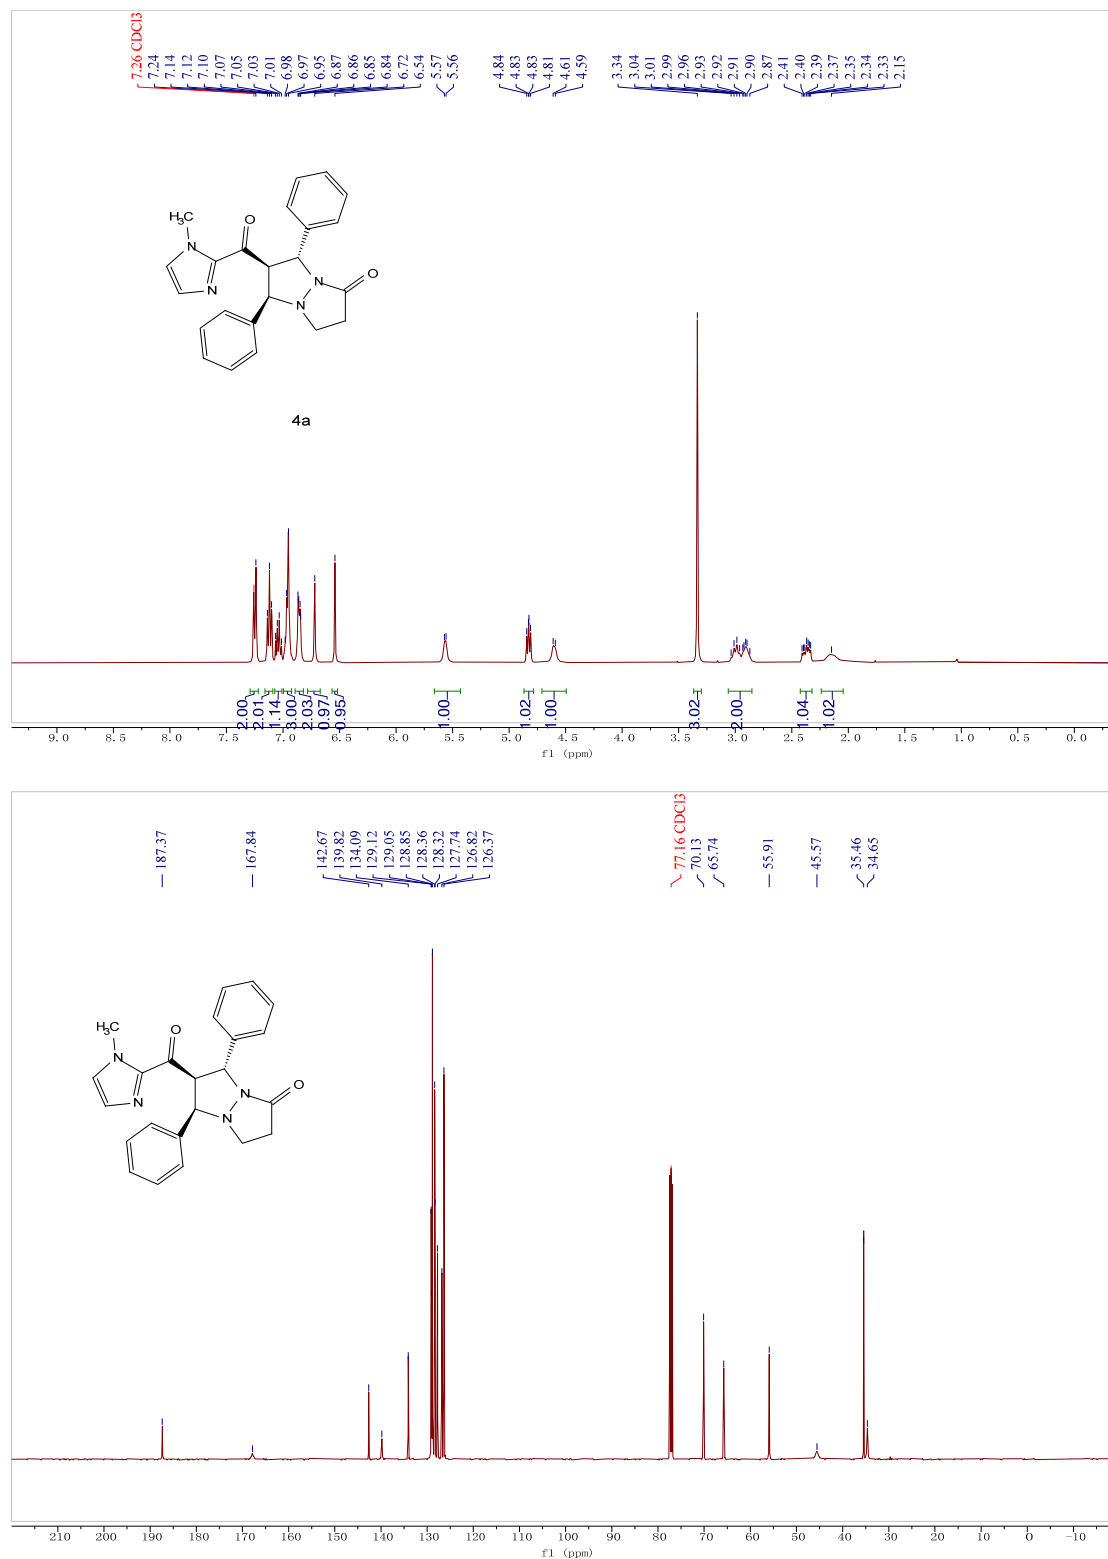

Figure S1.  $^1\text{H}$  and  $^{13}\text{C}$  NMR spectrum of 4a.

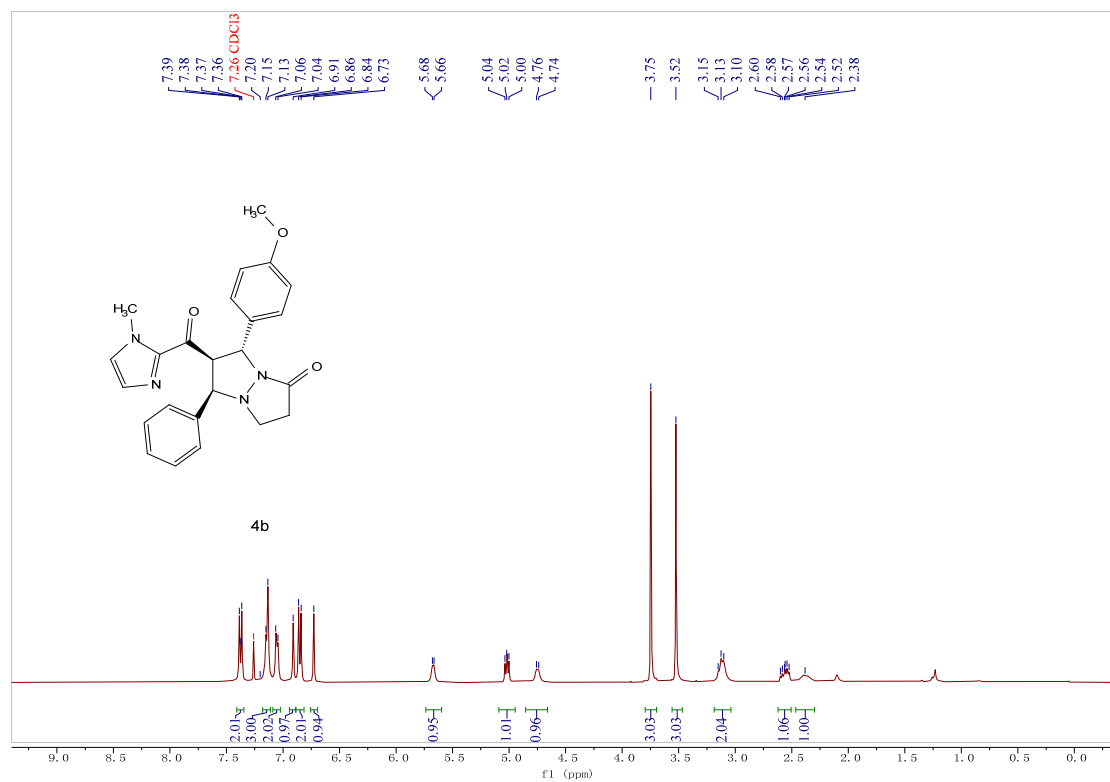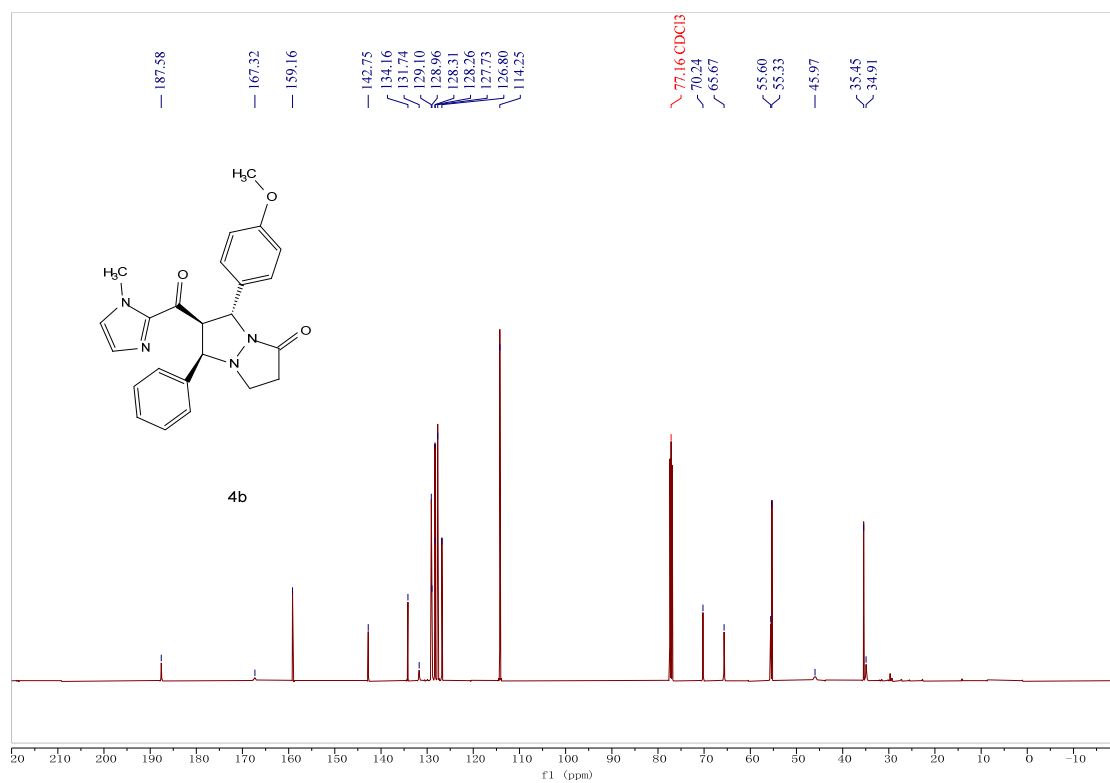

**Figure S2.** <sup>1</sup>H and <sup>13</sup>C NMR spectrum of **4b**.

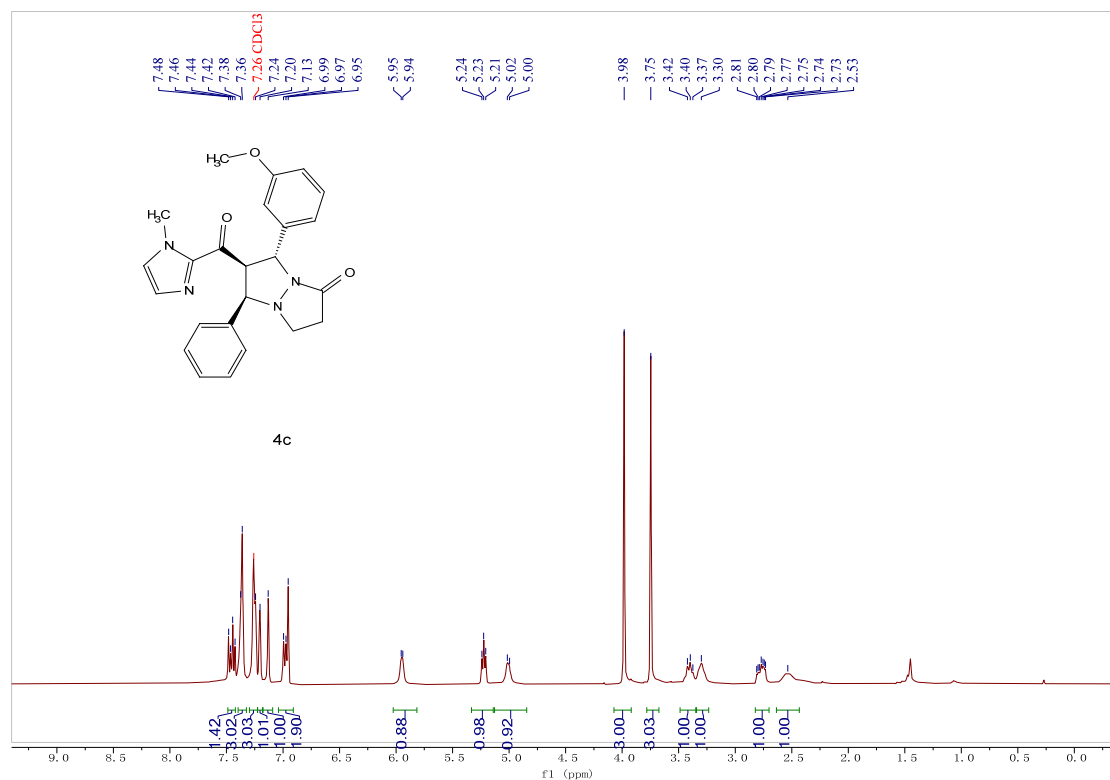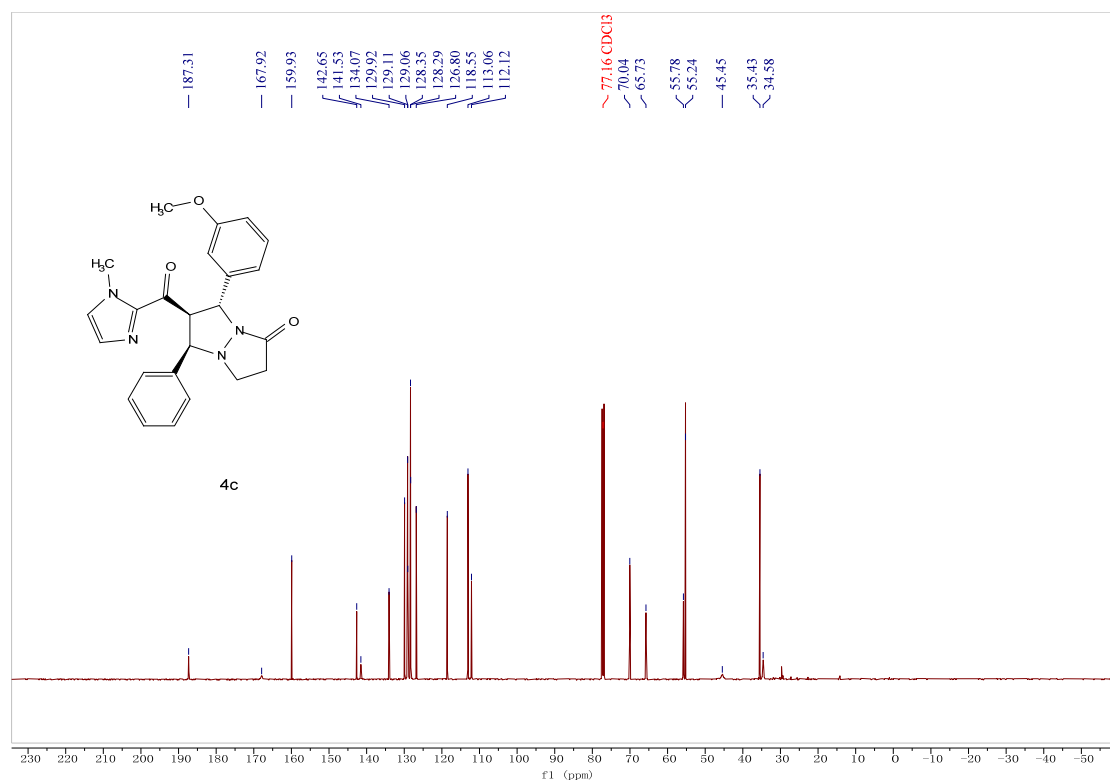

**Figure S3.** <sup>1</sup>H and <sup>13</sup>C NMR spectrum of 4c.

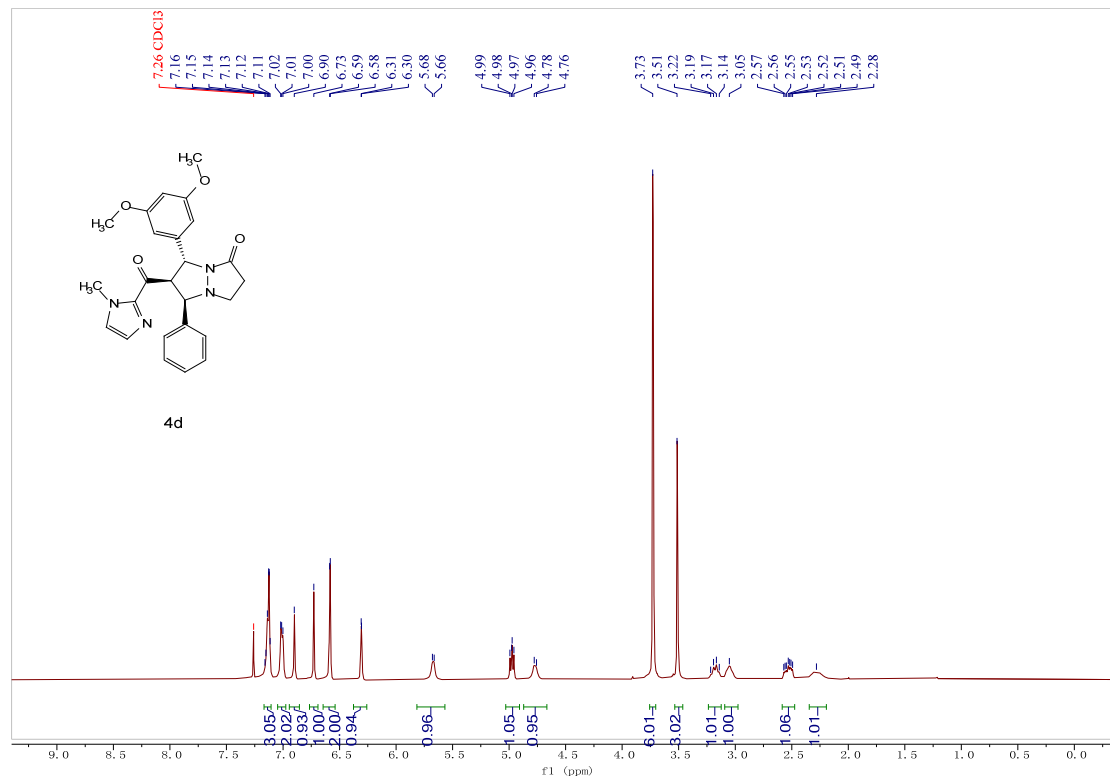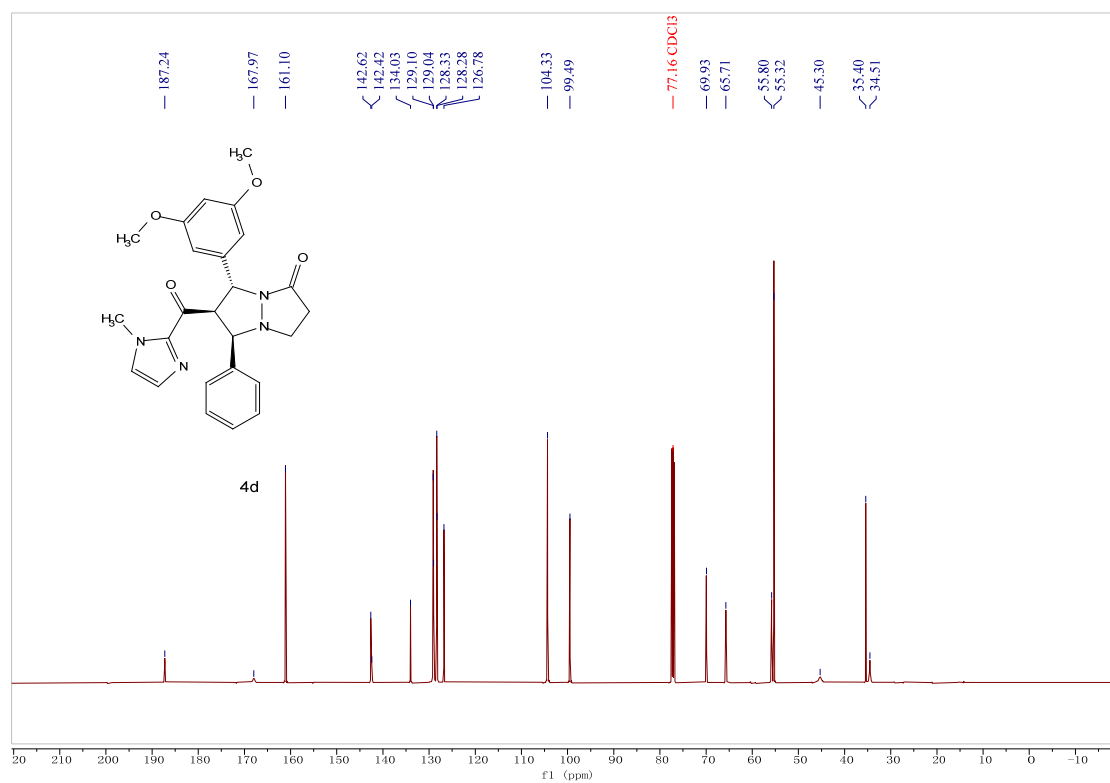

**Figure S4.** <sup>1</sup>H and <sup>13</sup>C NMR spectrum of 4d.

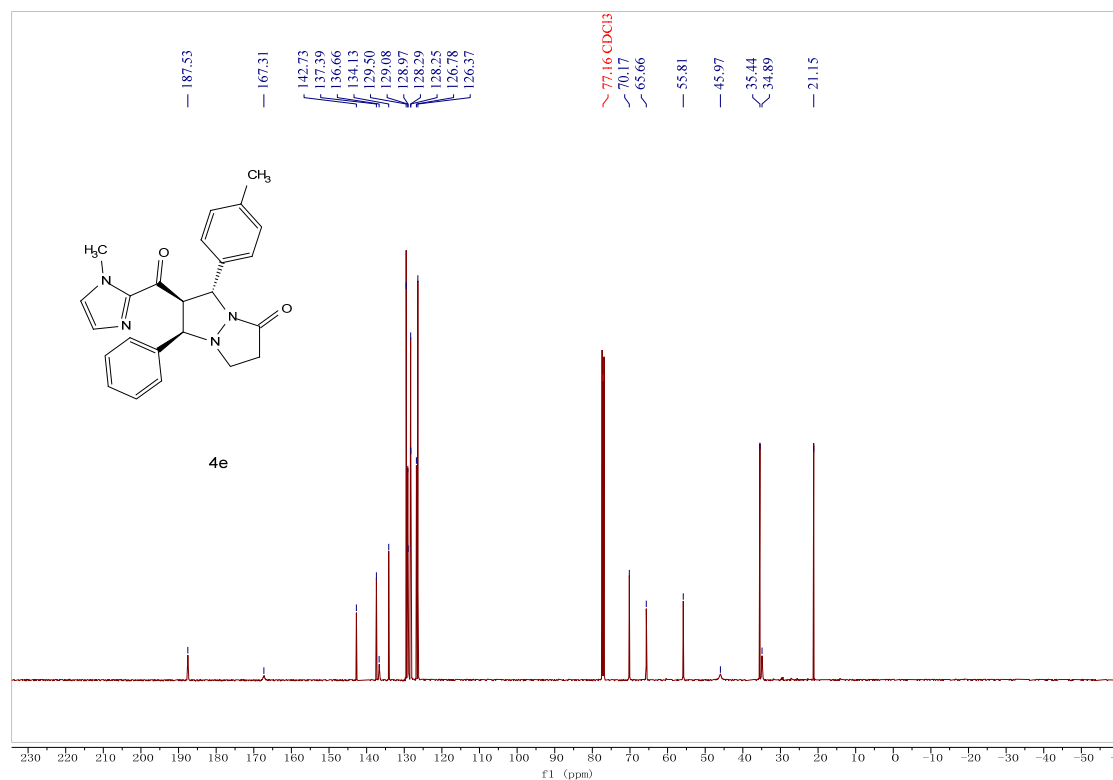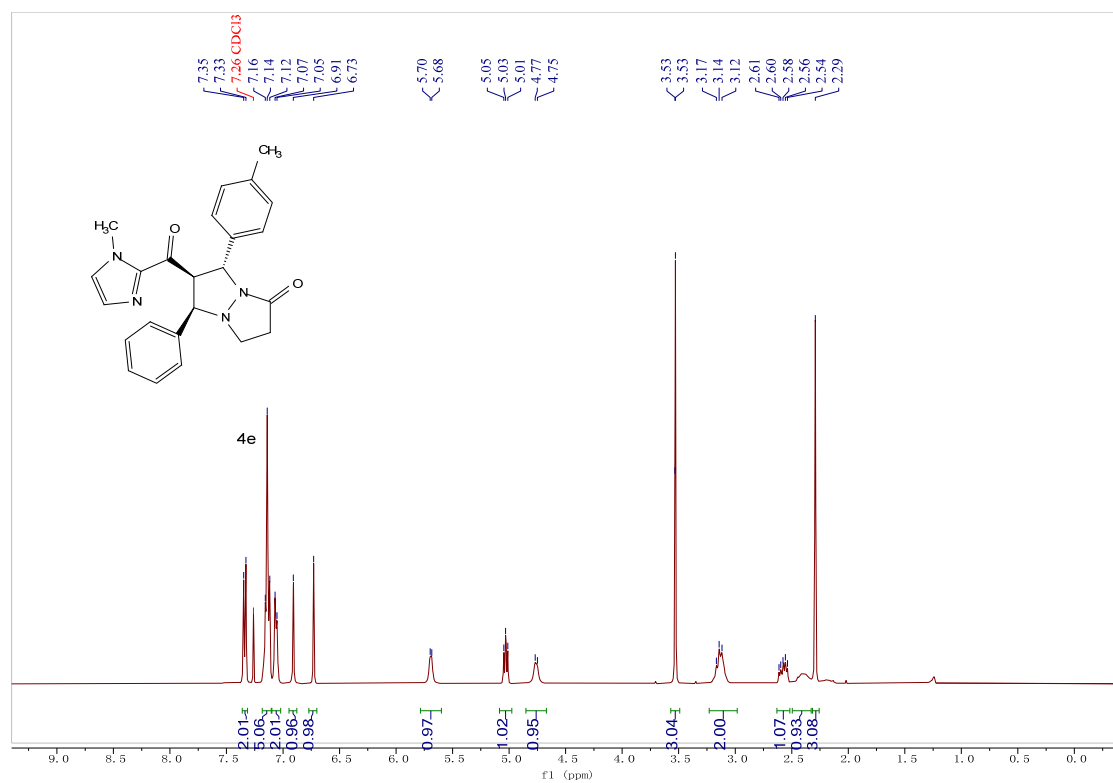

**Figure S5.** <sup>1</sup>H and <sup>13</sup>C NMR spectrum of 4e.

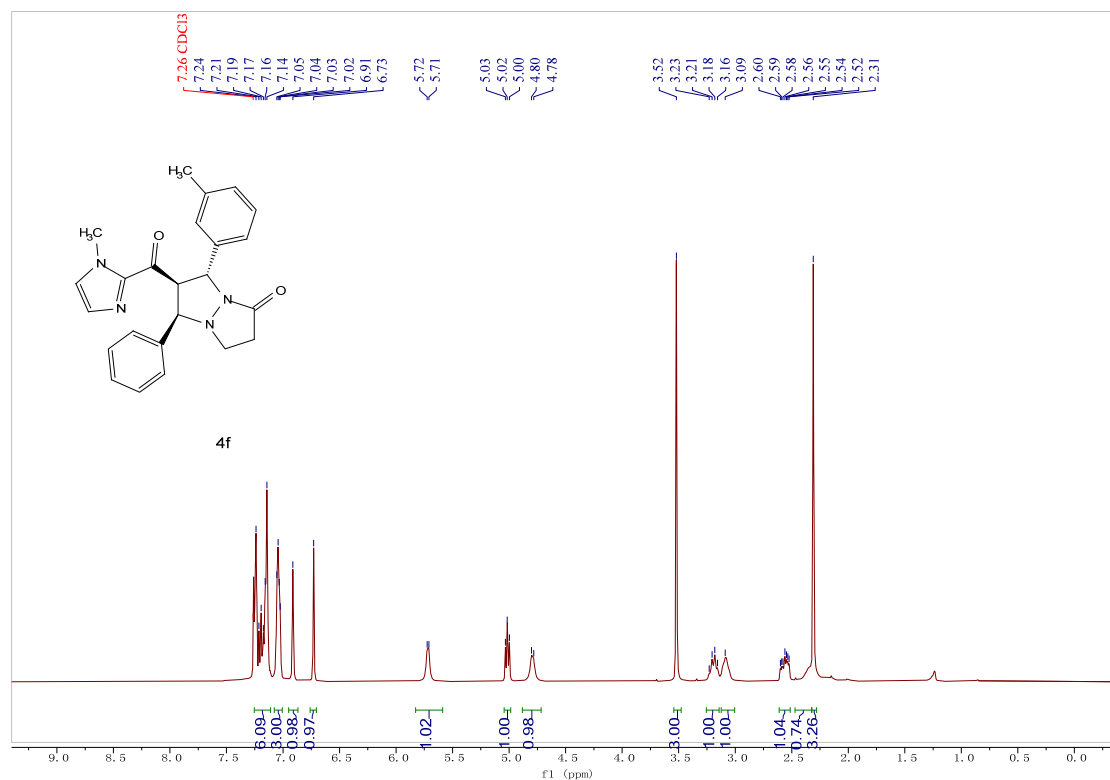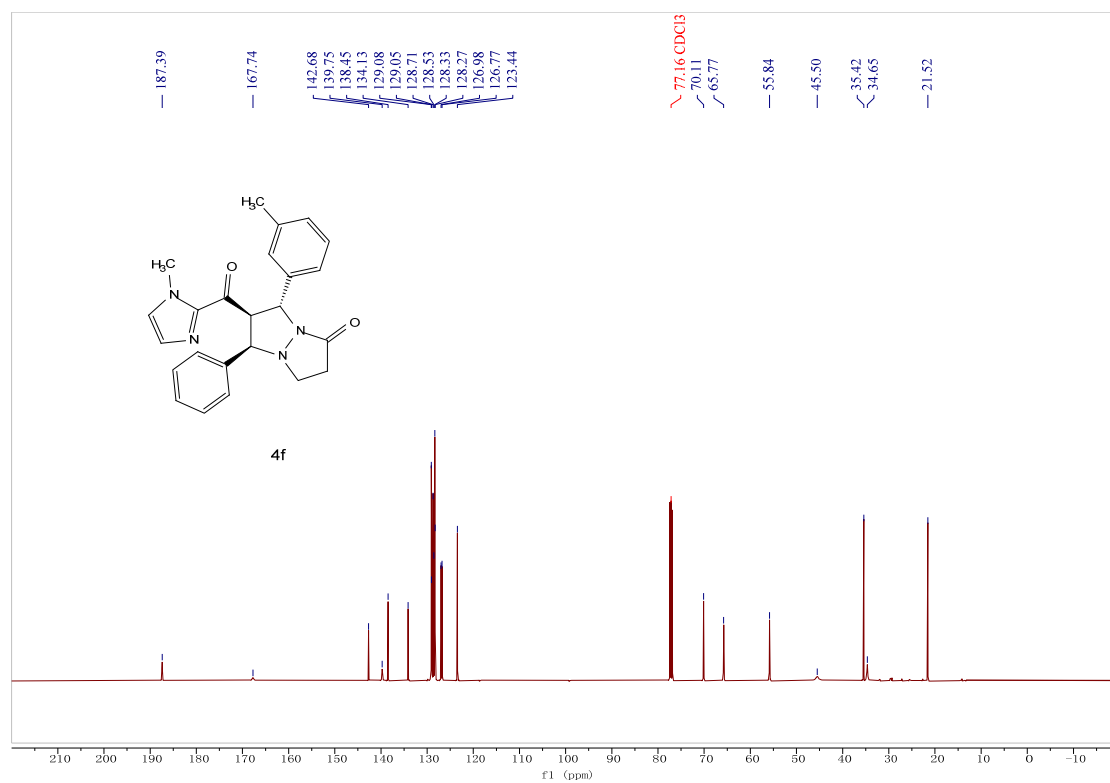

**Figure S6.** <sup>1</sup>H and <sup>13</sup>C NMR spectrum of **4f**.



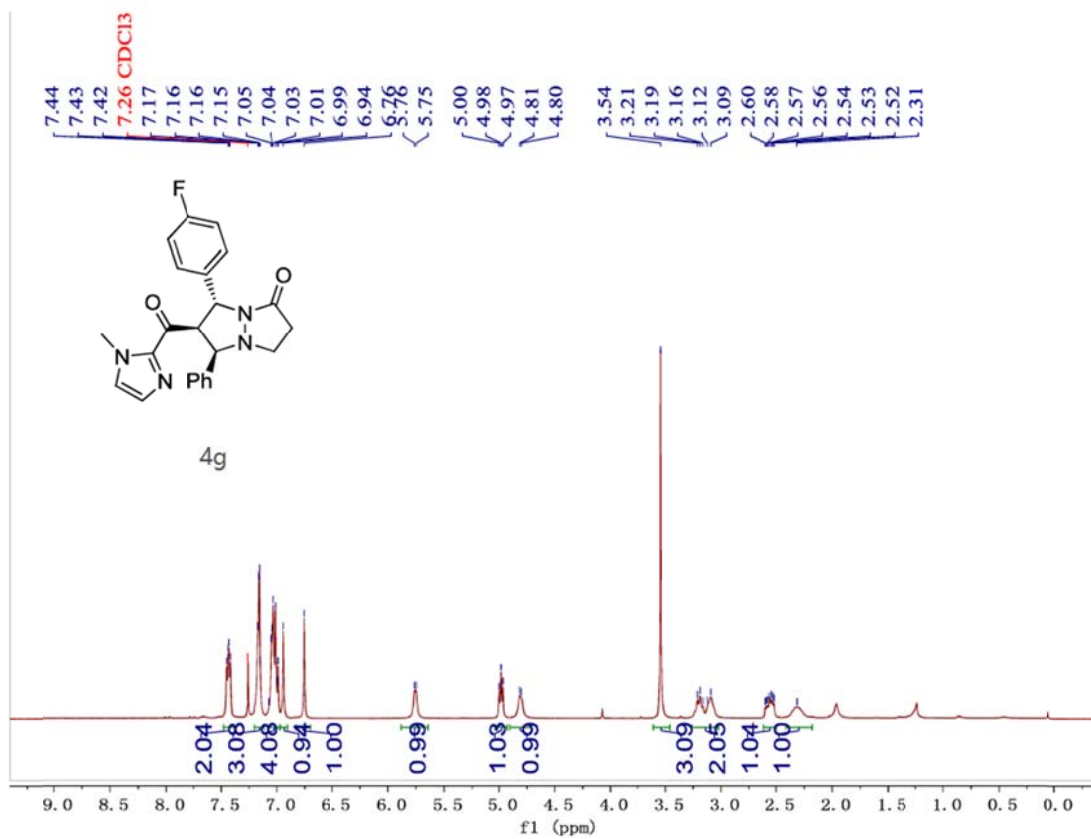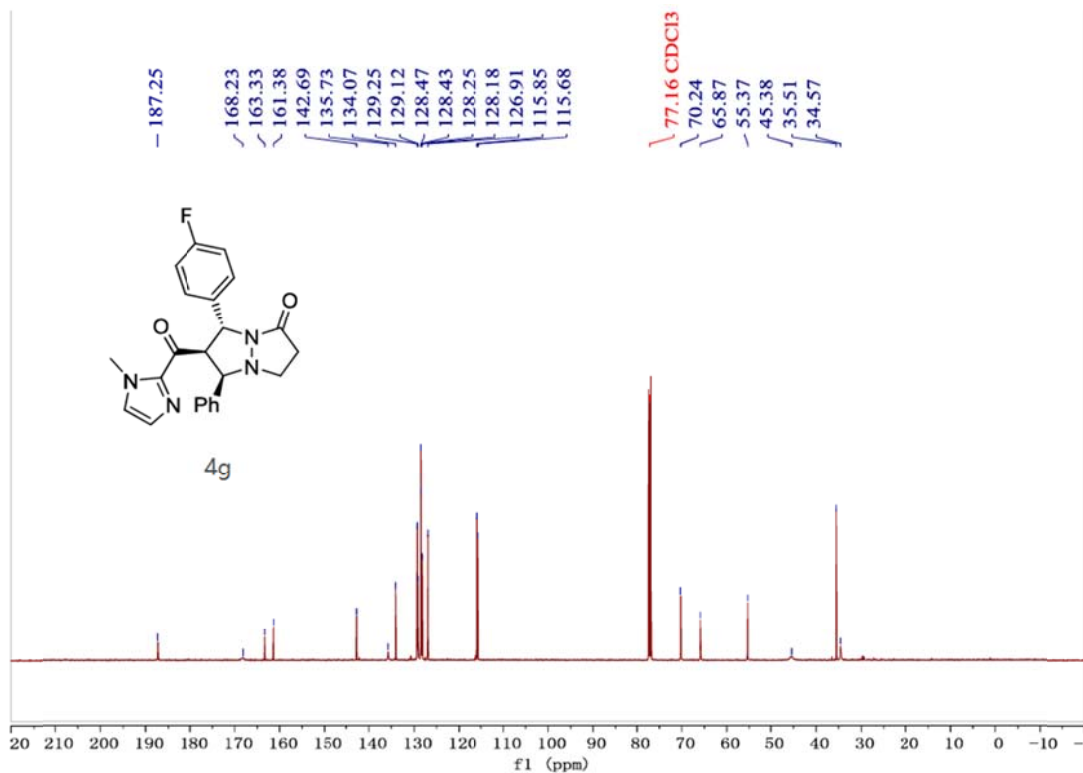

**Figure S7.** <sup>1</sup>H and <sup>13</sup>C NMR spectrum of **4g**.

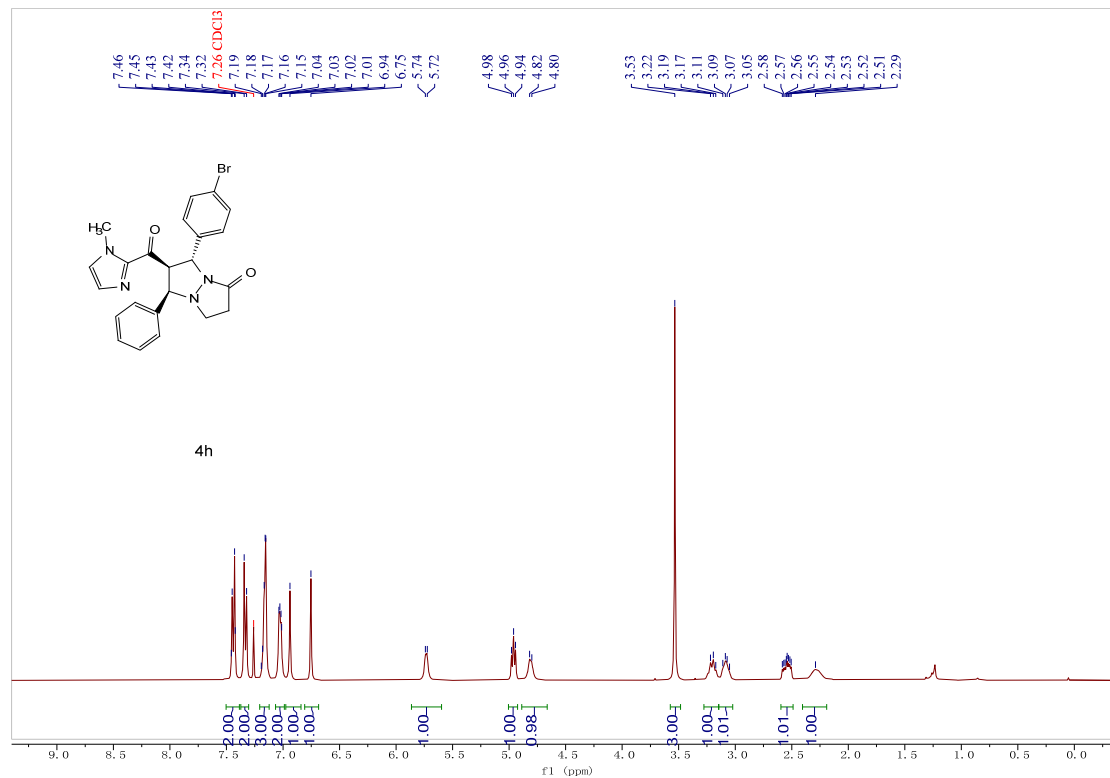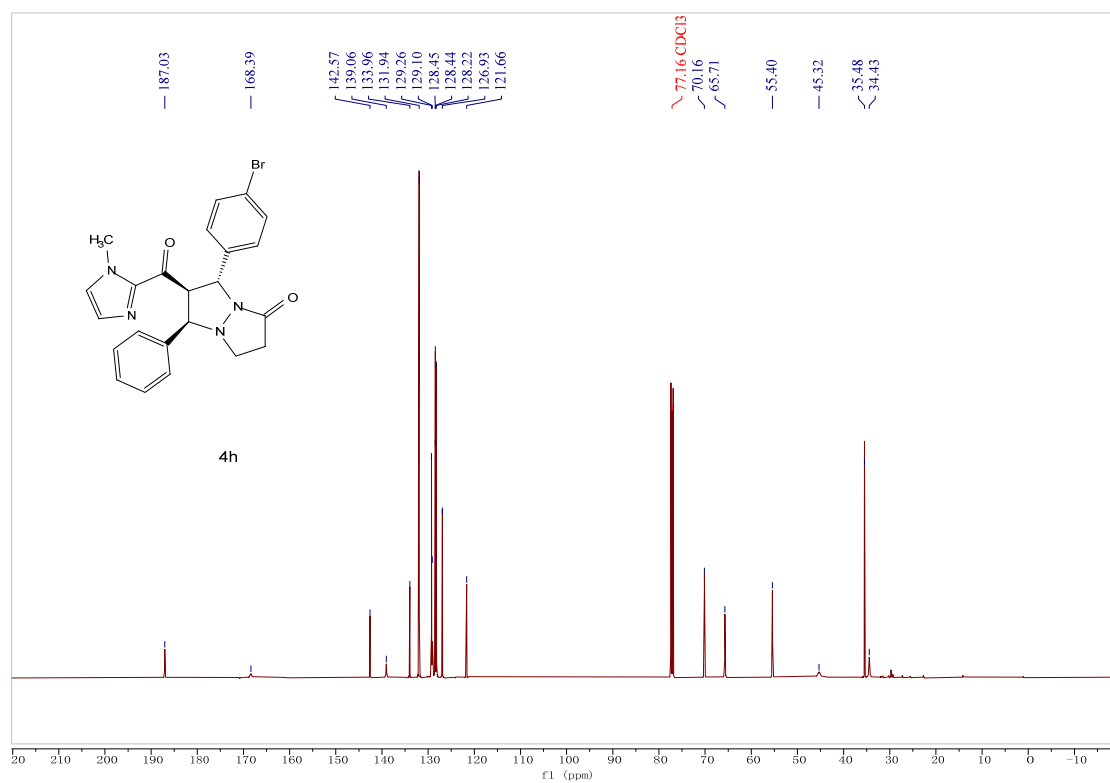

**Figure S8.** <sup>1</sup>H and <sup>13</sup>C NMR spectrum of **4h**.

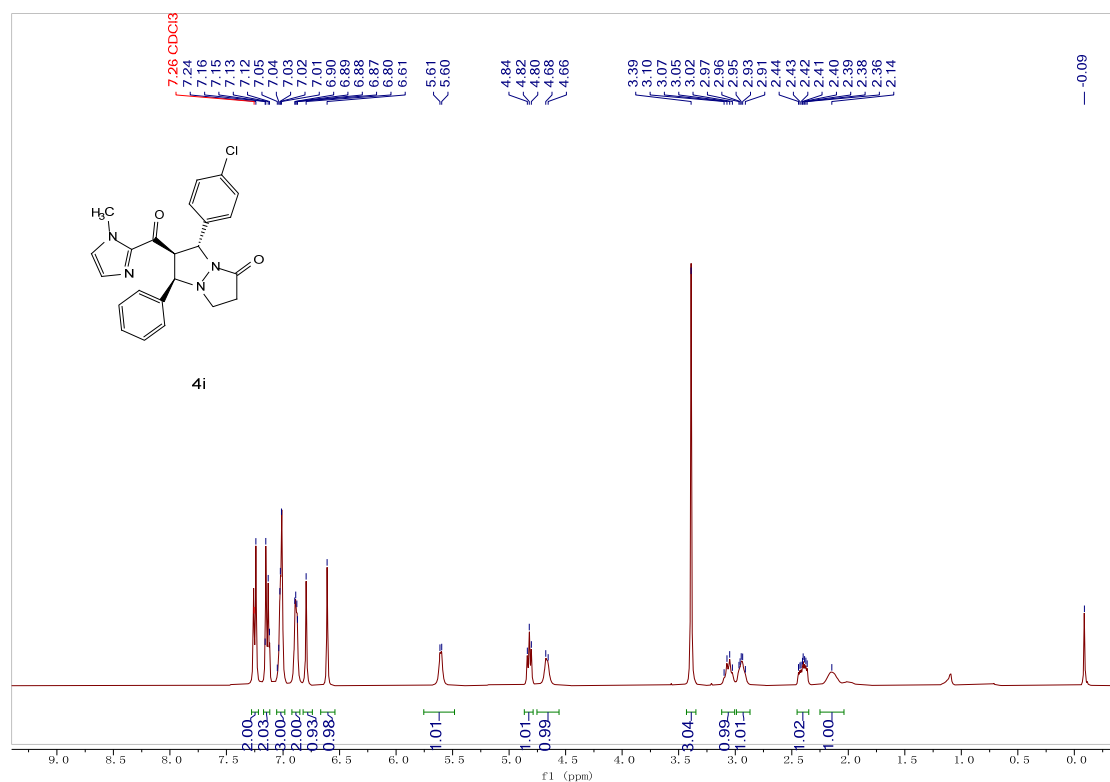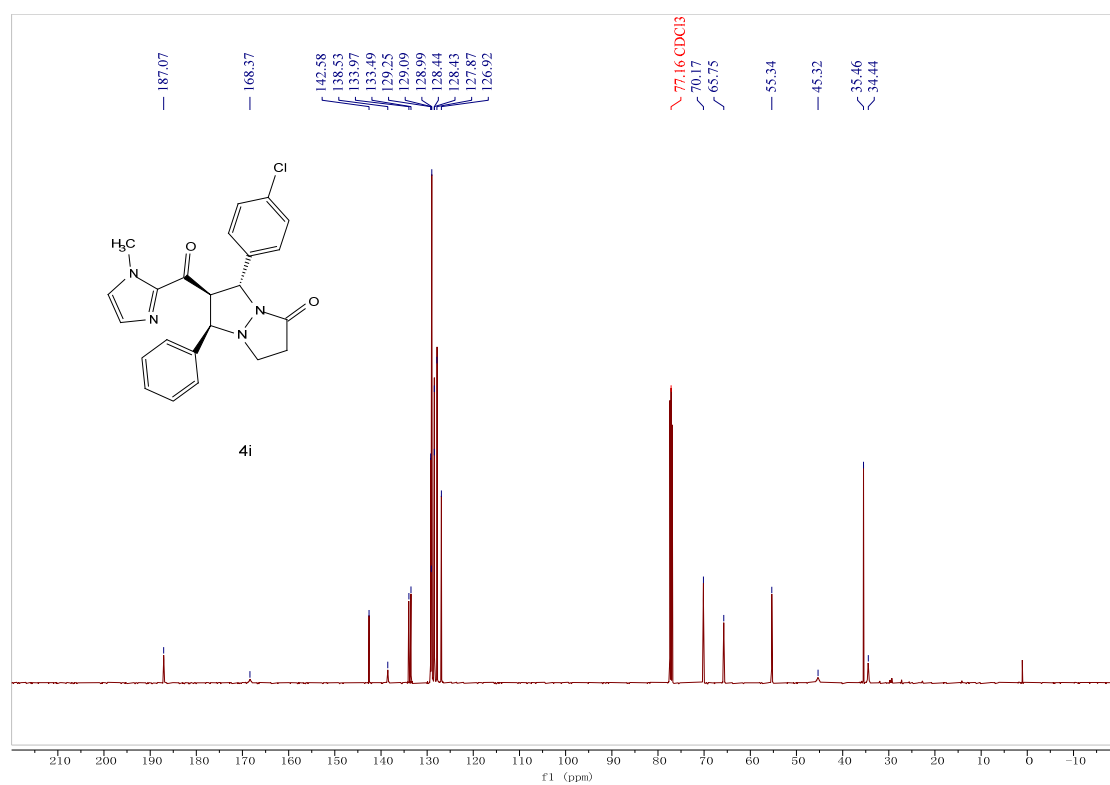

**Figure S9.** <sup>1</sup>H and <sup>13</sup>C NMR spectrum of **4i**.

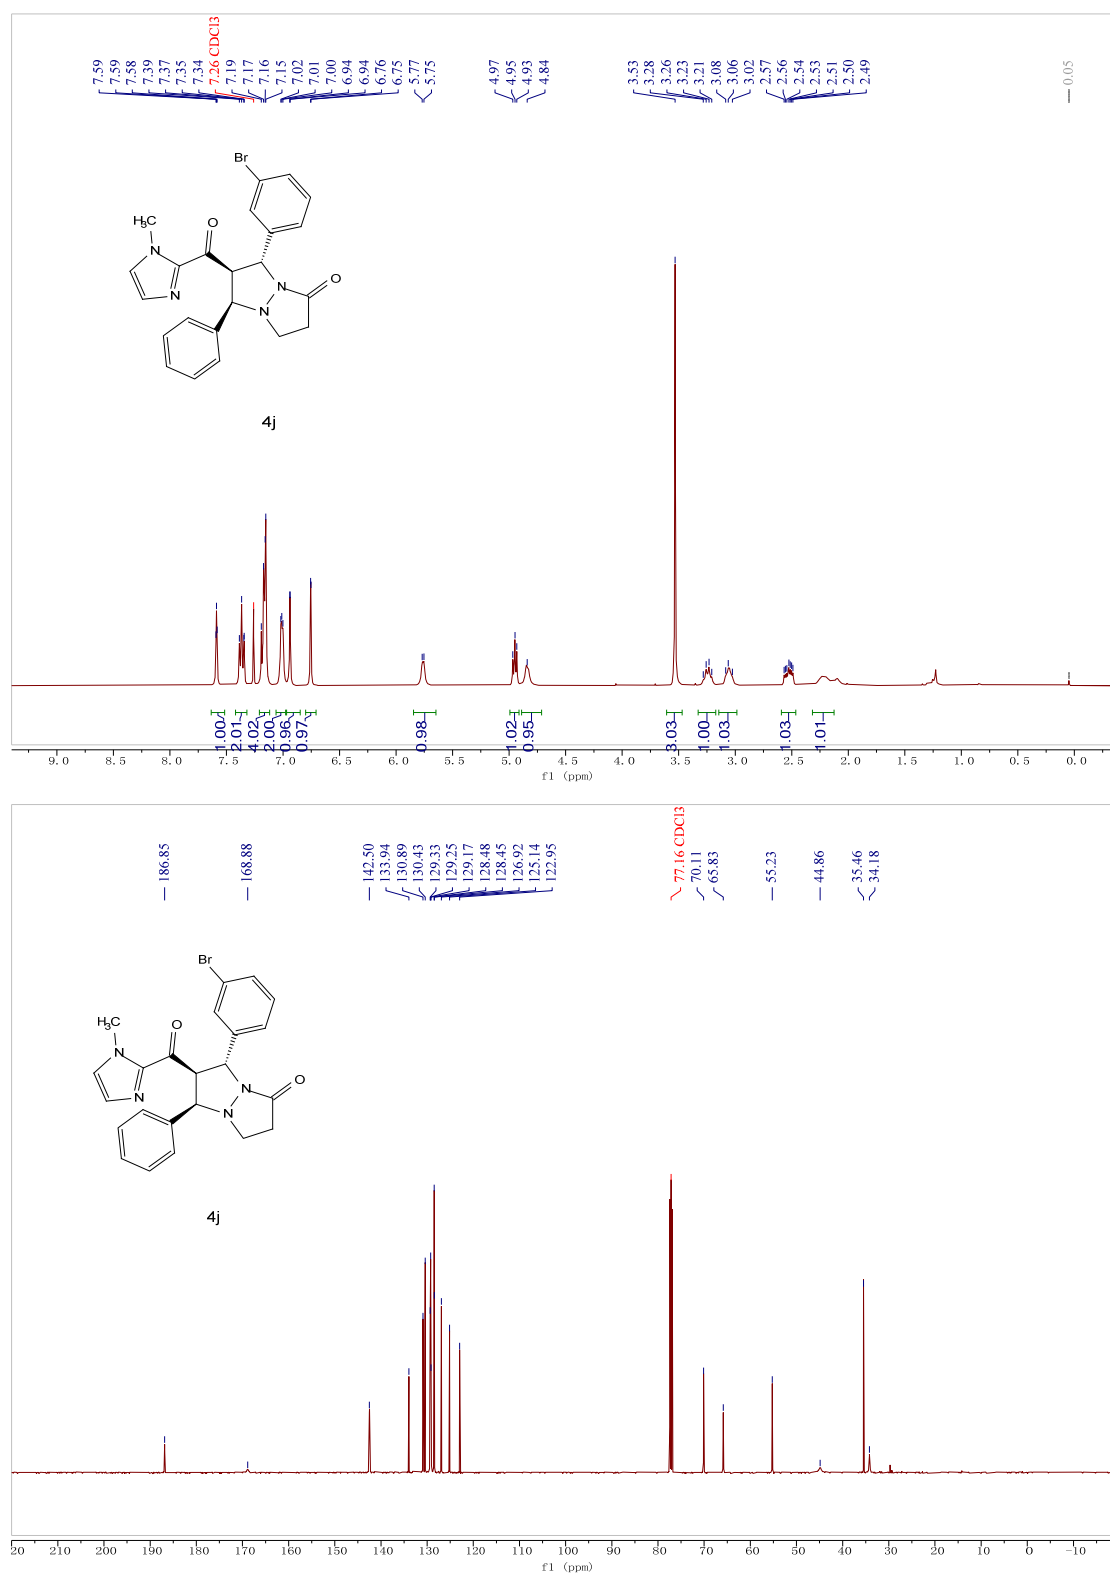

**Figure S10.** <sup>1</sup>H and <sup>13</sup>C NMR spectrum of **4j**.

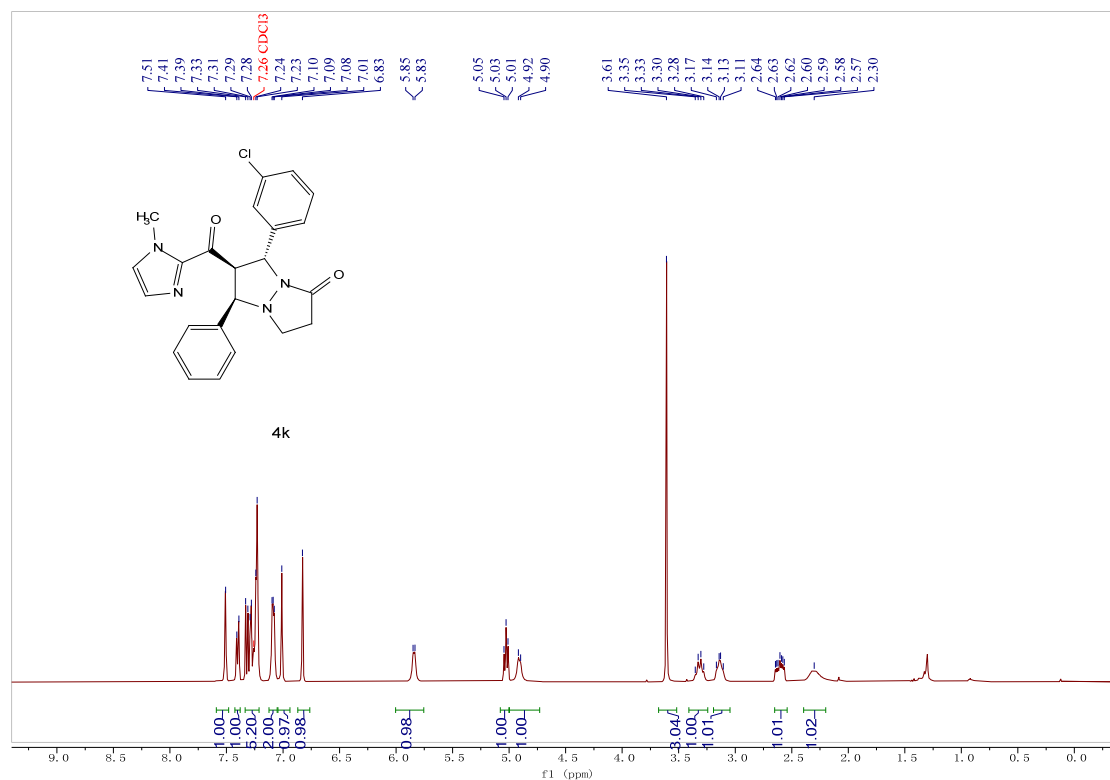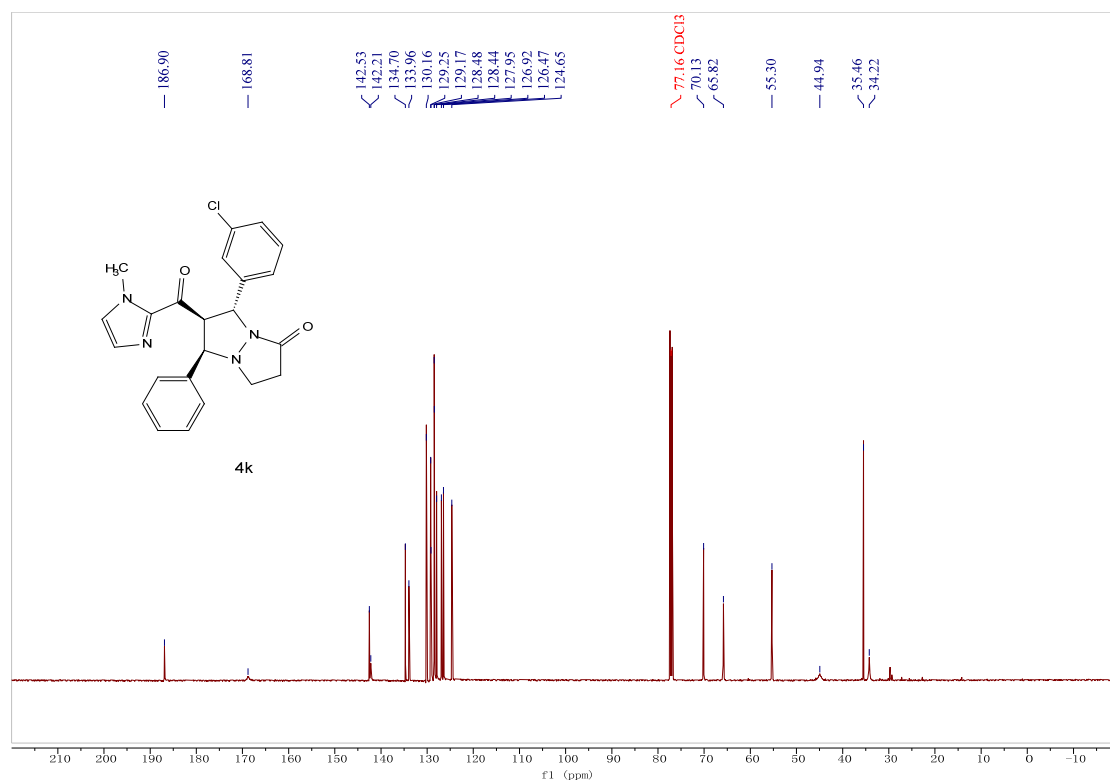

Figure S11. <sup>1</sup>H and <sup>13</sup>C NMR spectrum of 4k.

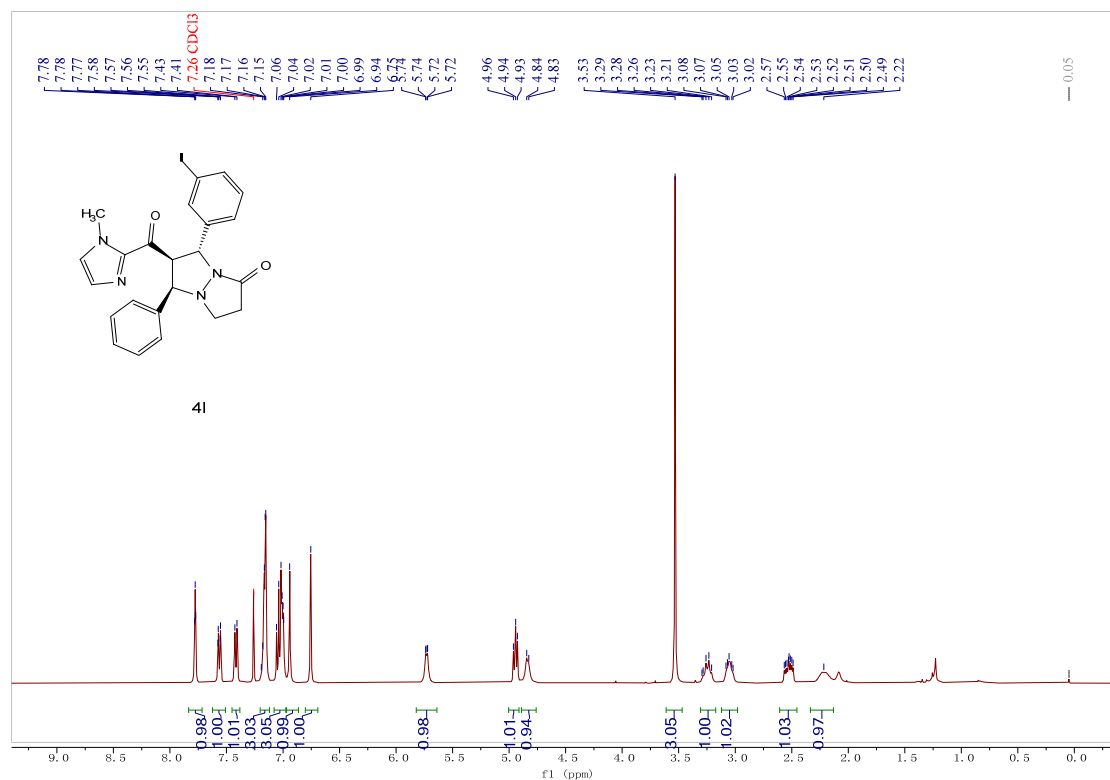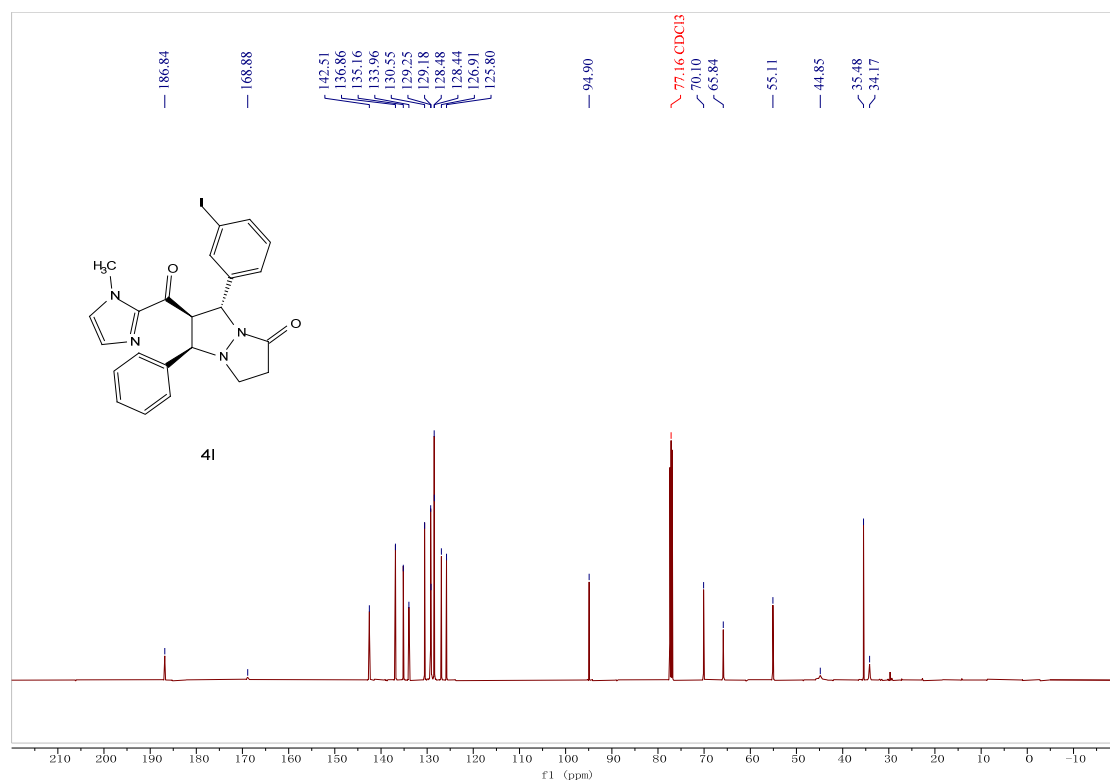

**Figure S12.** <sup>1</sup>H and <sup>13</sup>C NMR spectrum of **41**.

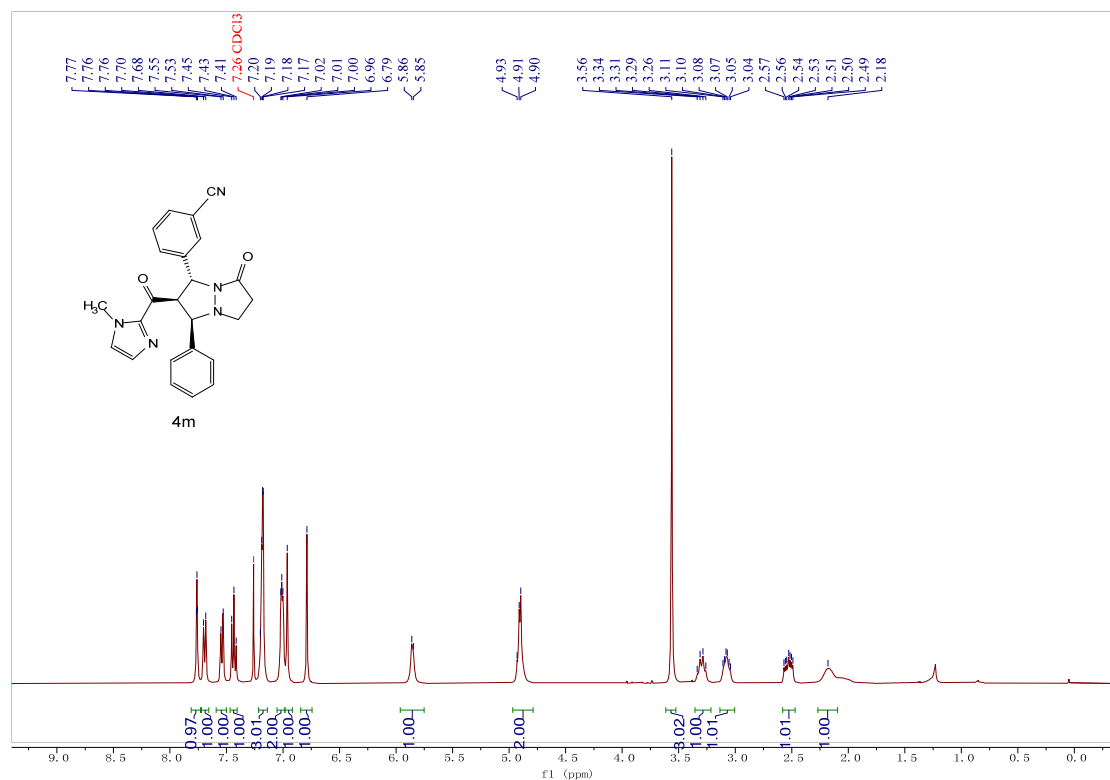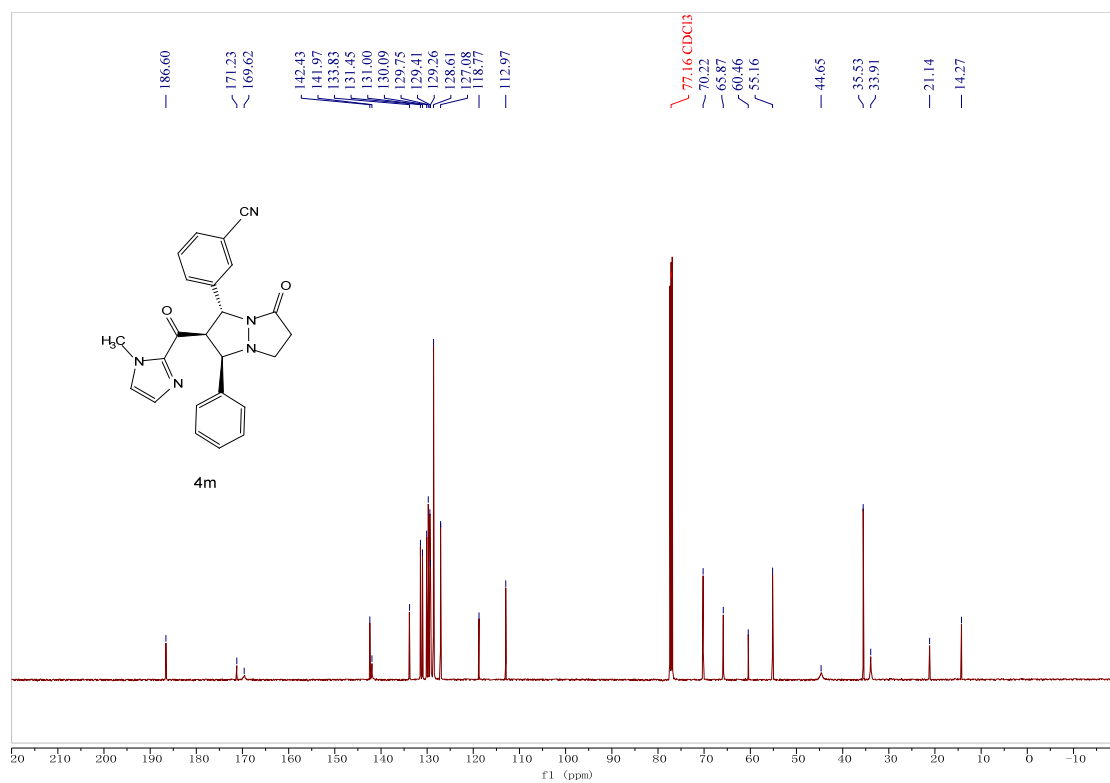

**Figure S13.** <sup>1</sup>H and <sup>13</sup>C NMR spectrum of **4m**.

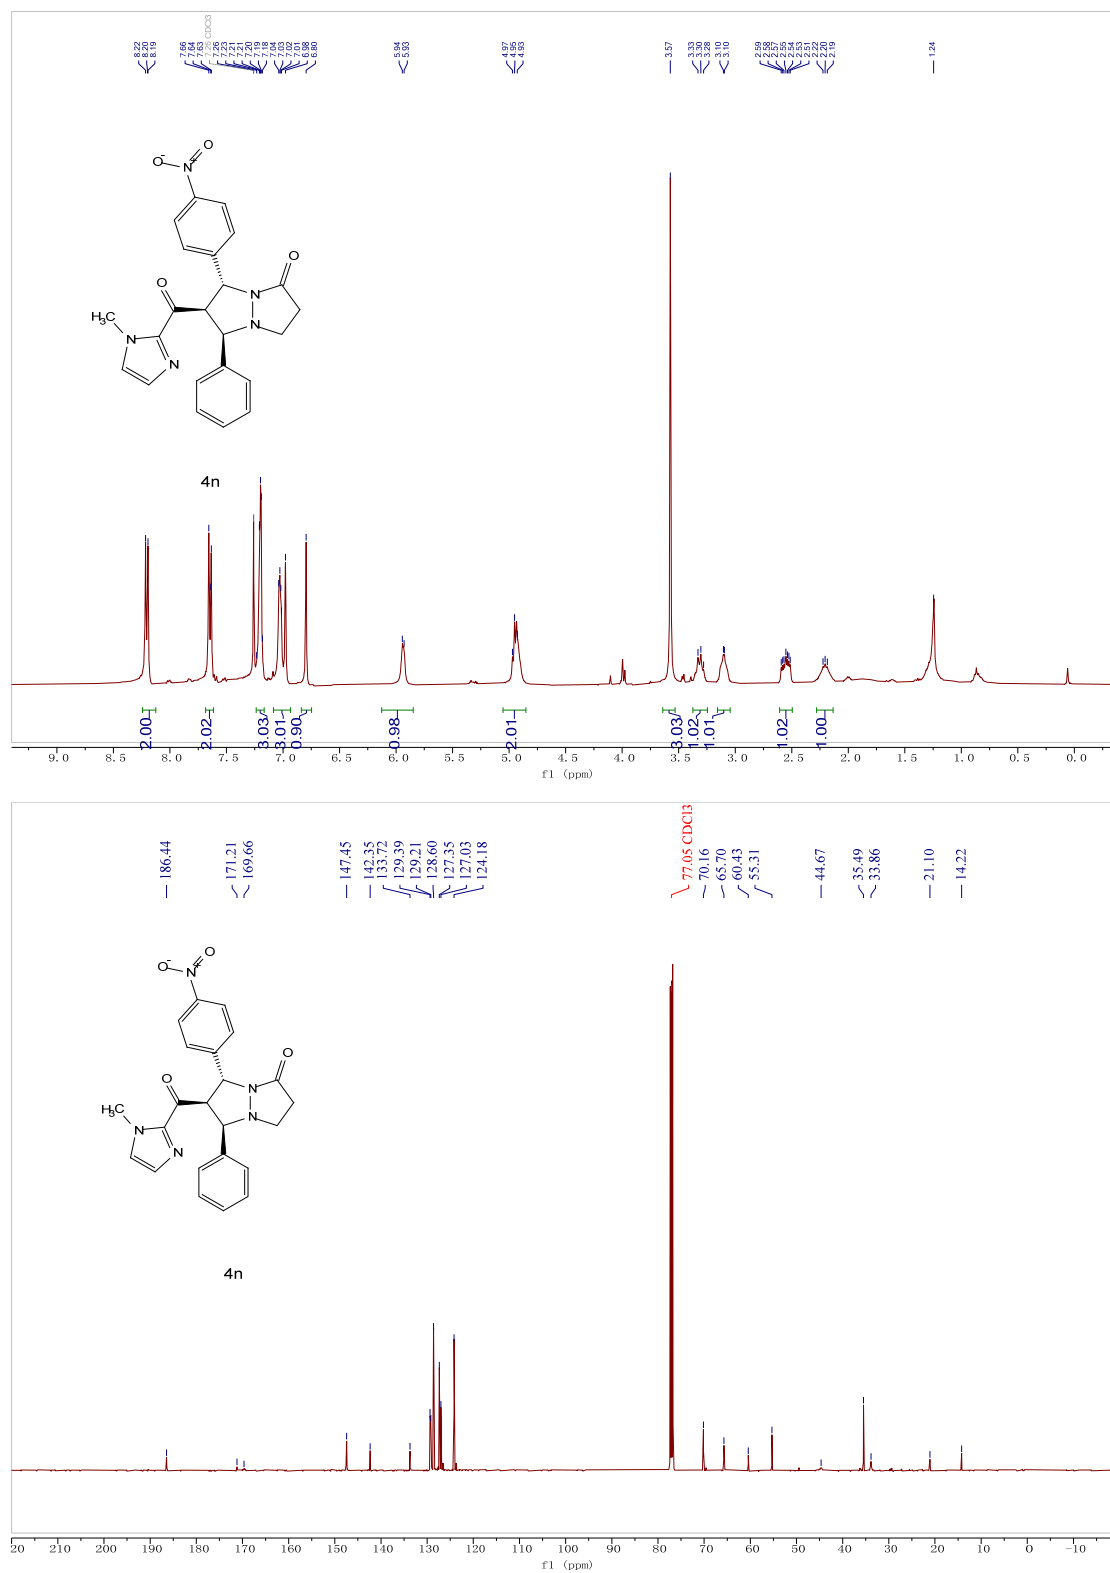

Figure S14. <sup>1</sup>H and <sup>13</sup>C NMR spectrum of 4n.



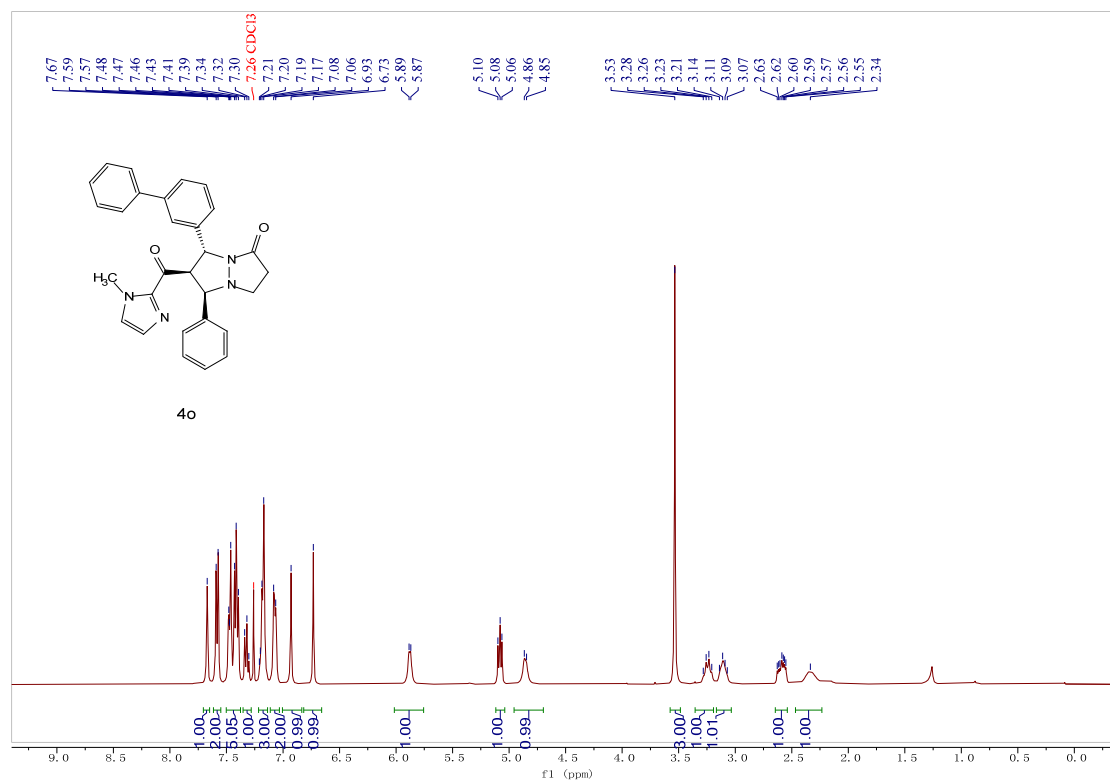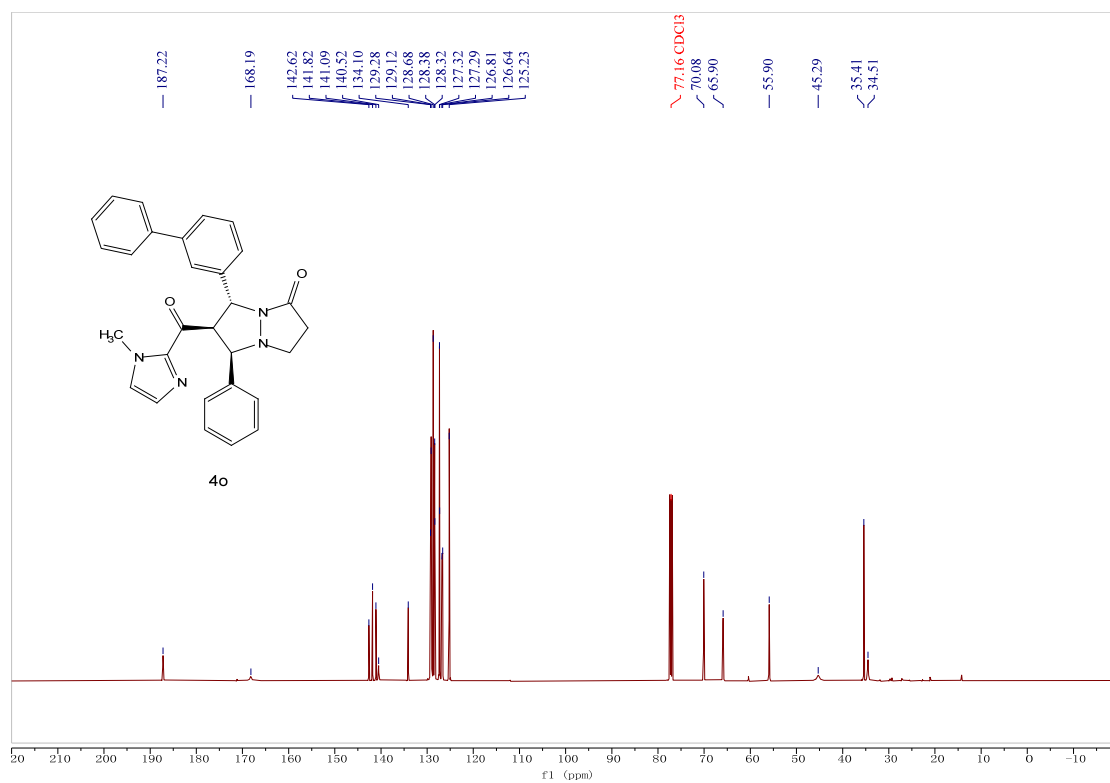

**Figure S15.** <sup>1</sup>H and <sup>13</sup>C NMR spectrum of **4o**.

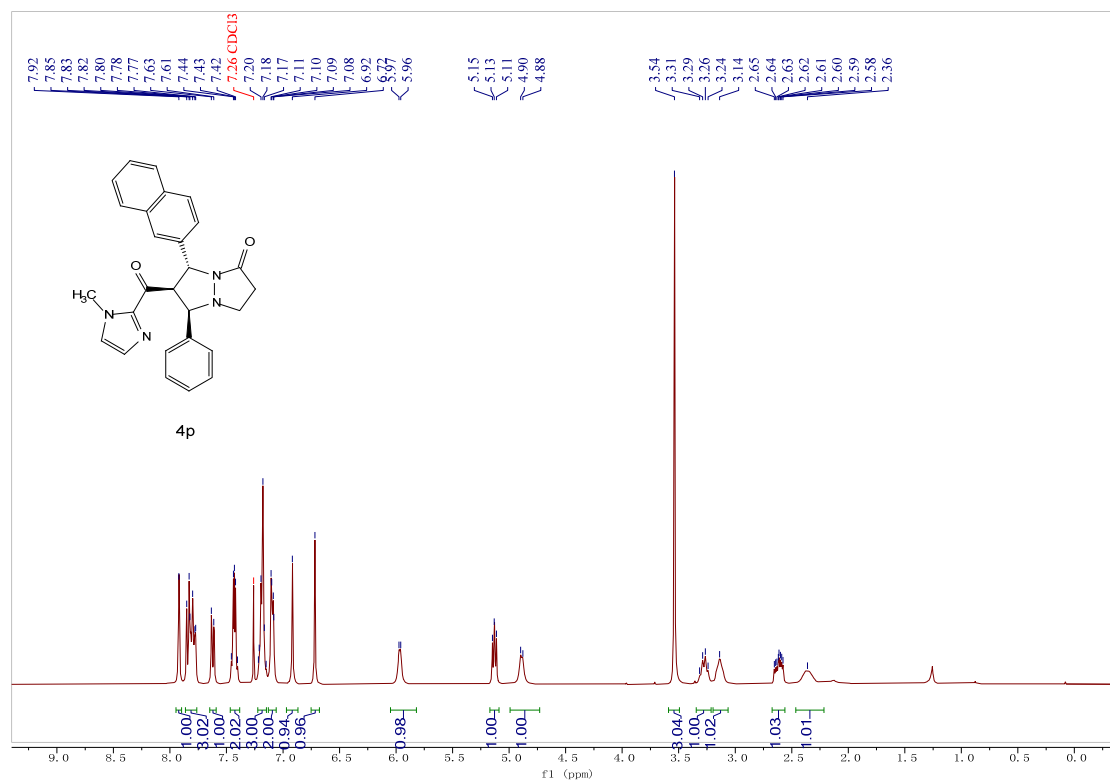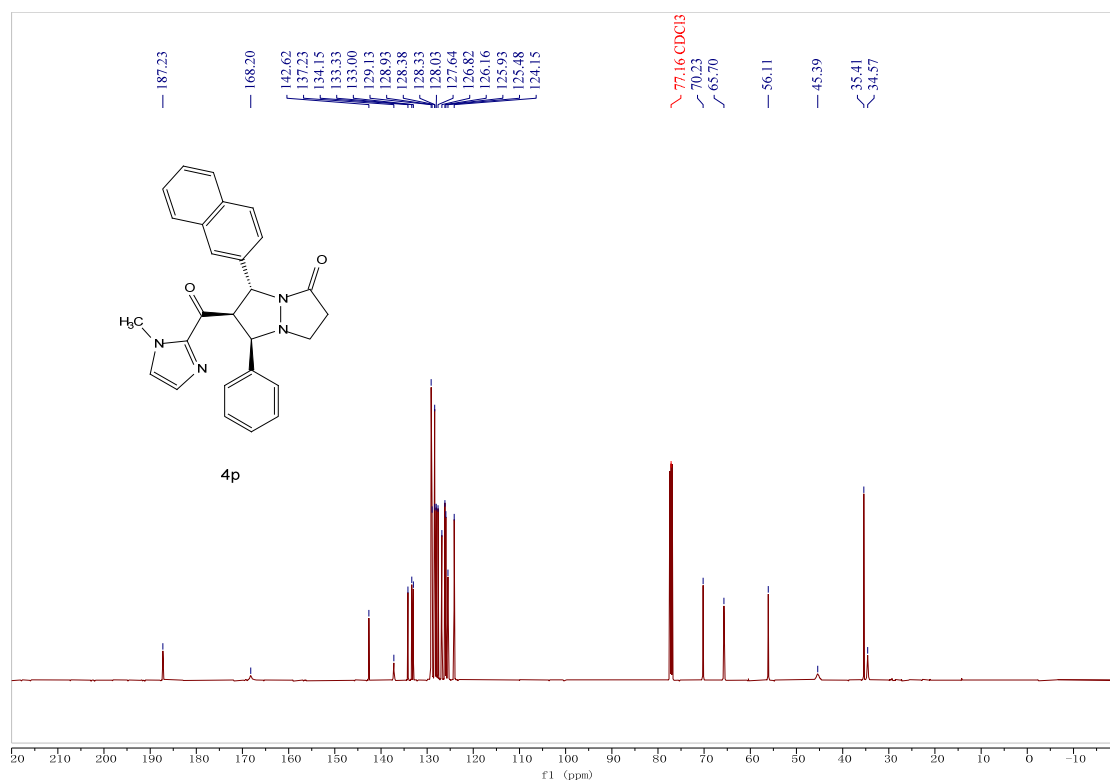

**Figure S16.** <sup>1</sup>H and <sup>13</sup>C NMR spectrum of **4p**.

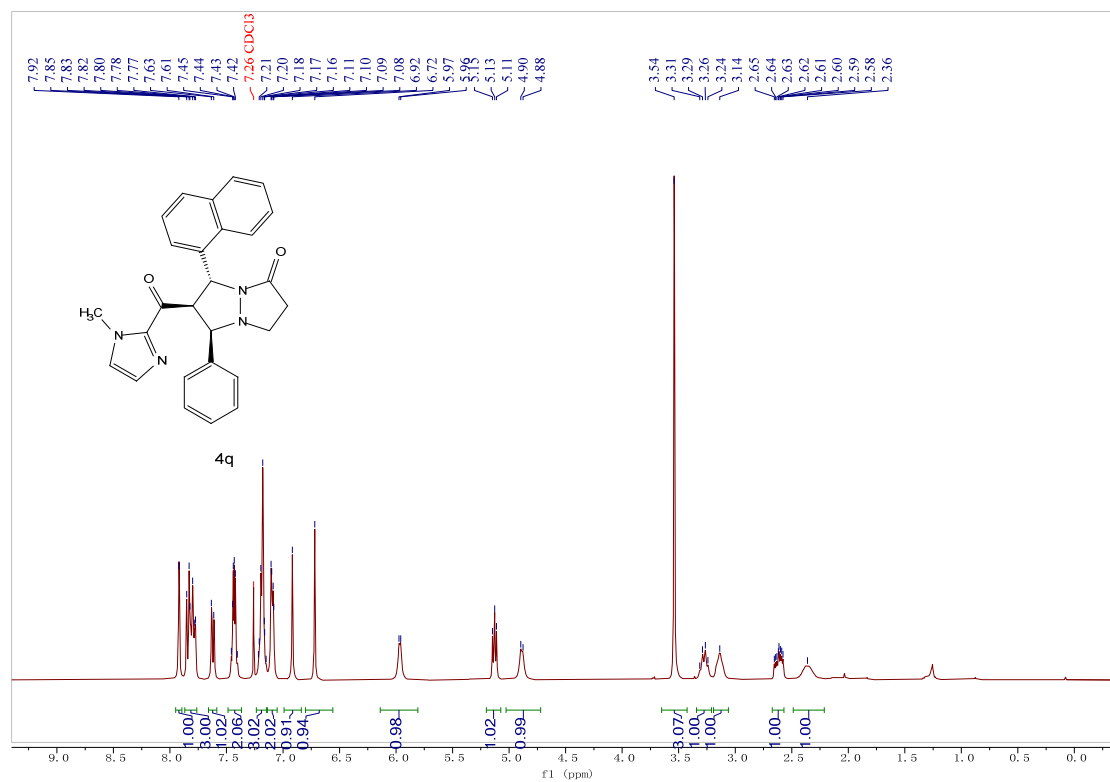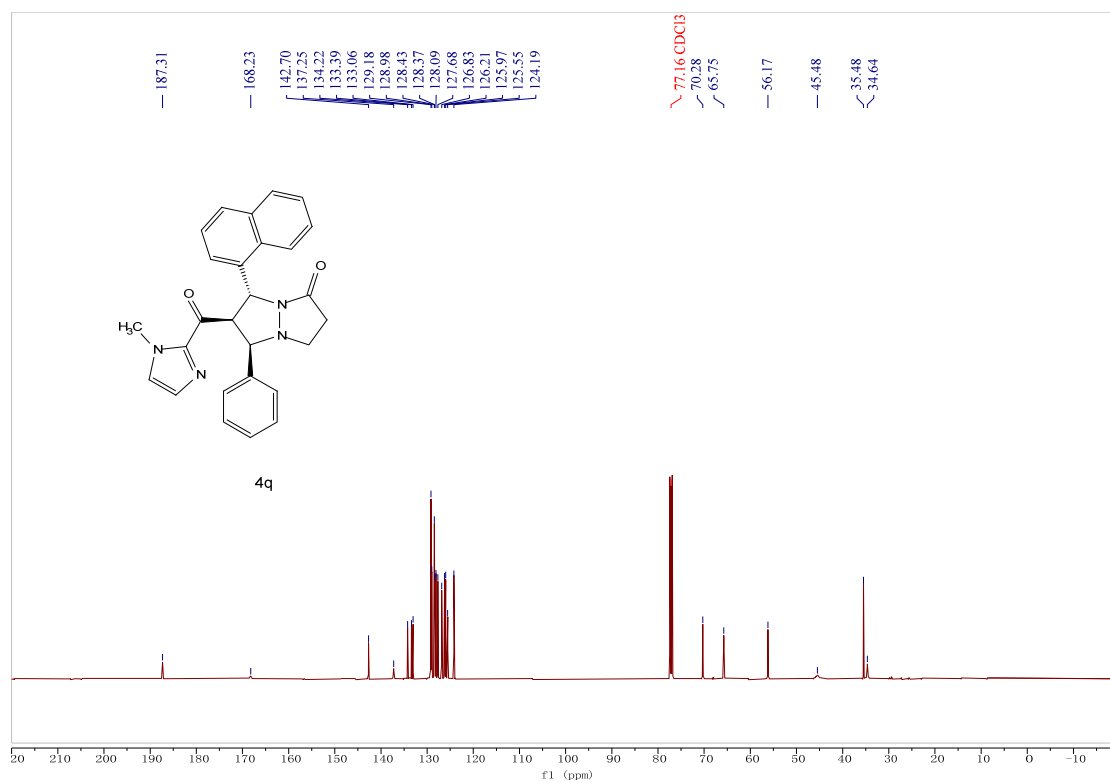

Figure S17. <sup>1</sup>H and <sup>13</sup>C NMR spectrum of 4q.

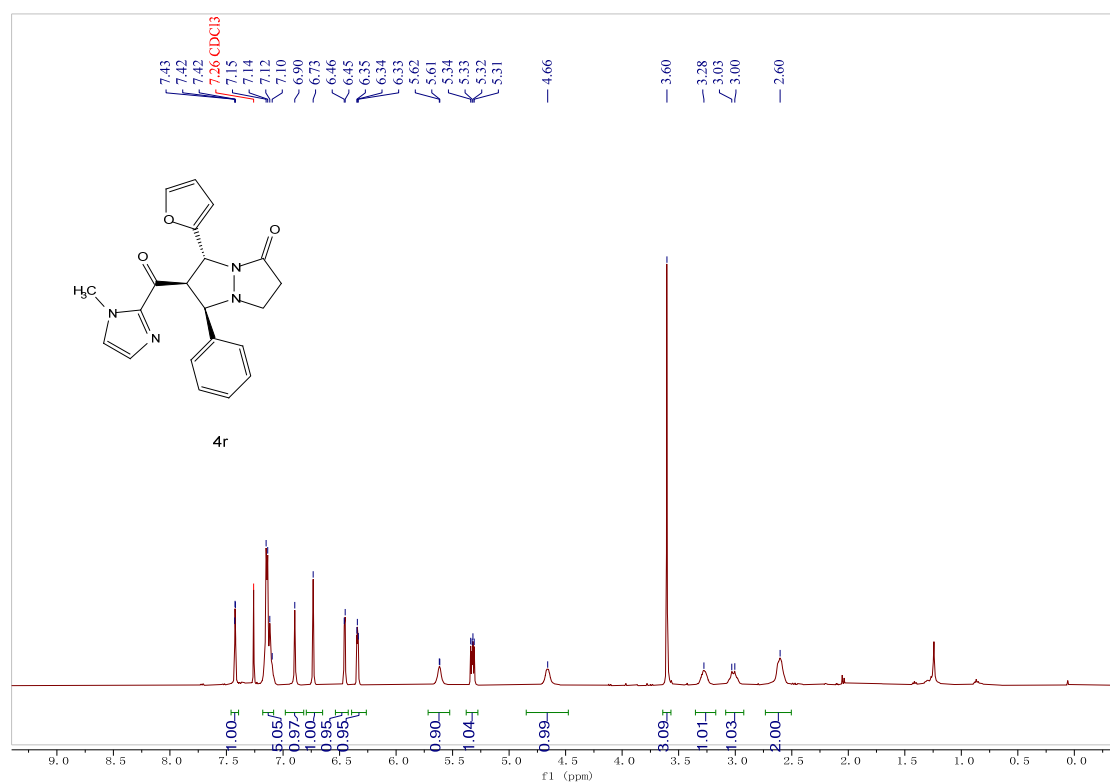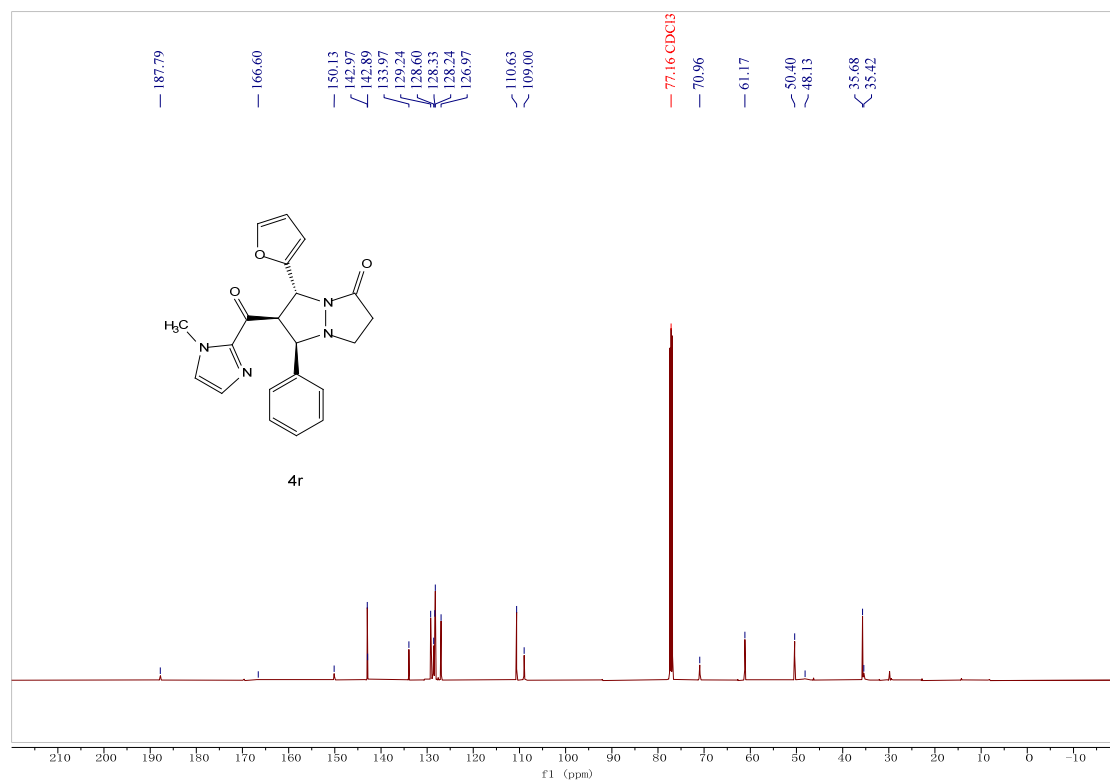

**Figure S18.** <sup>1</sup>H and <sup>13</sup>C NMR spectrum of **4r**.

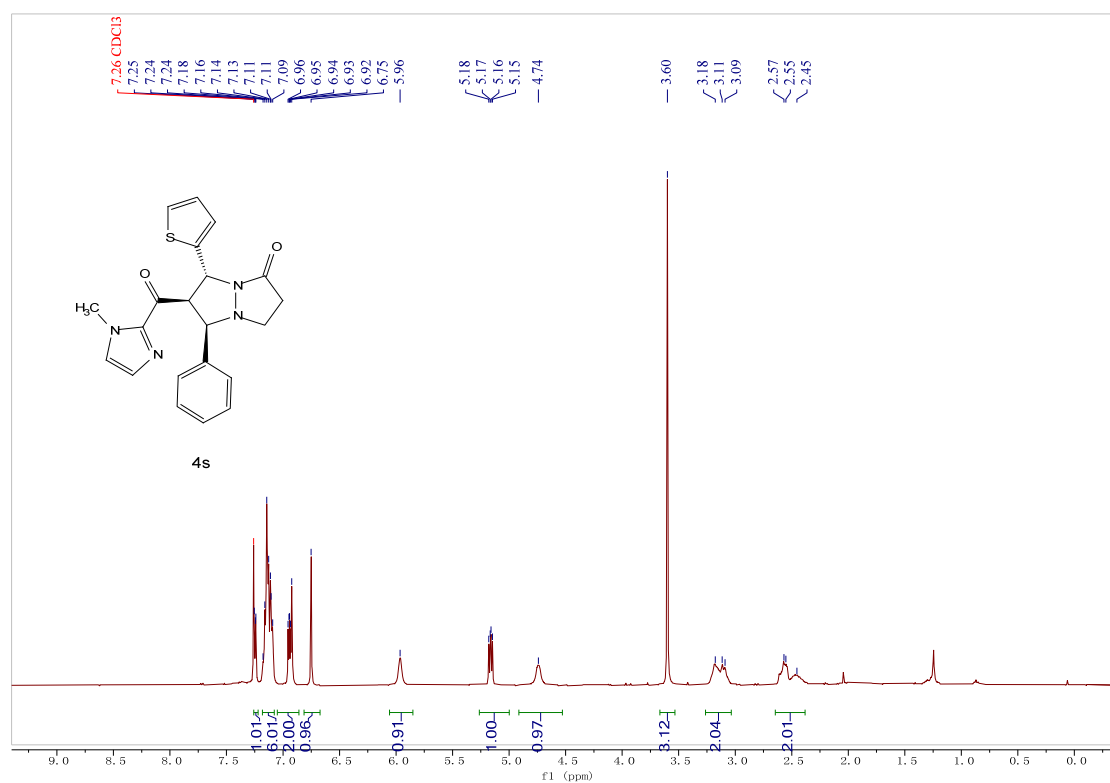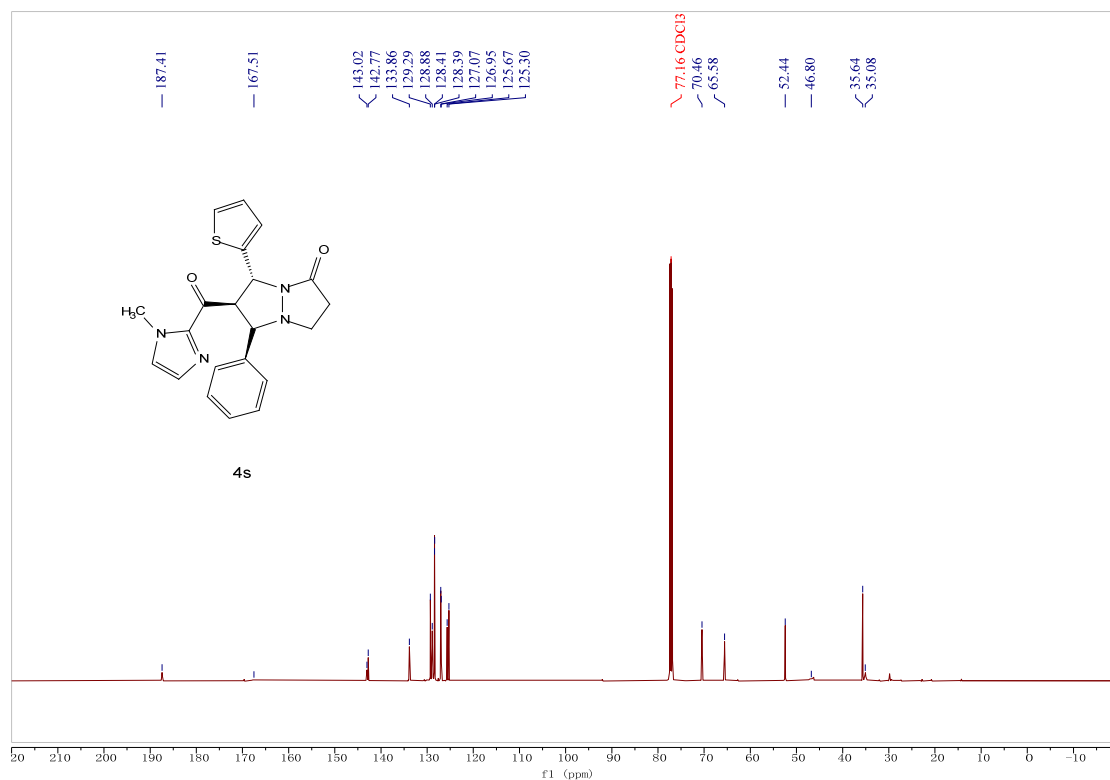

**Figure S19.** <sup>1</sup>H and <sup>13</sup>C NMR spectrum of **4s**.

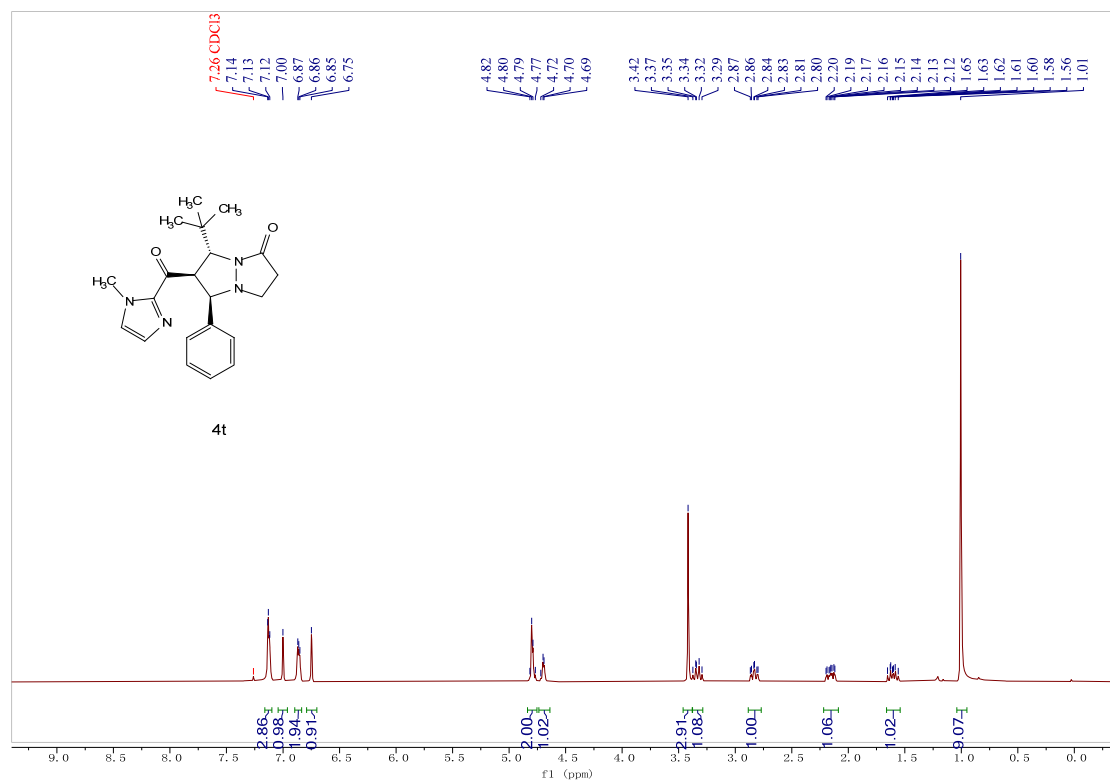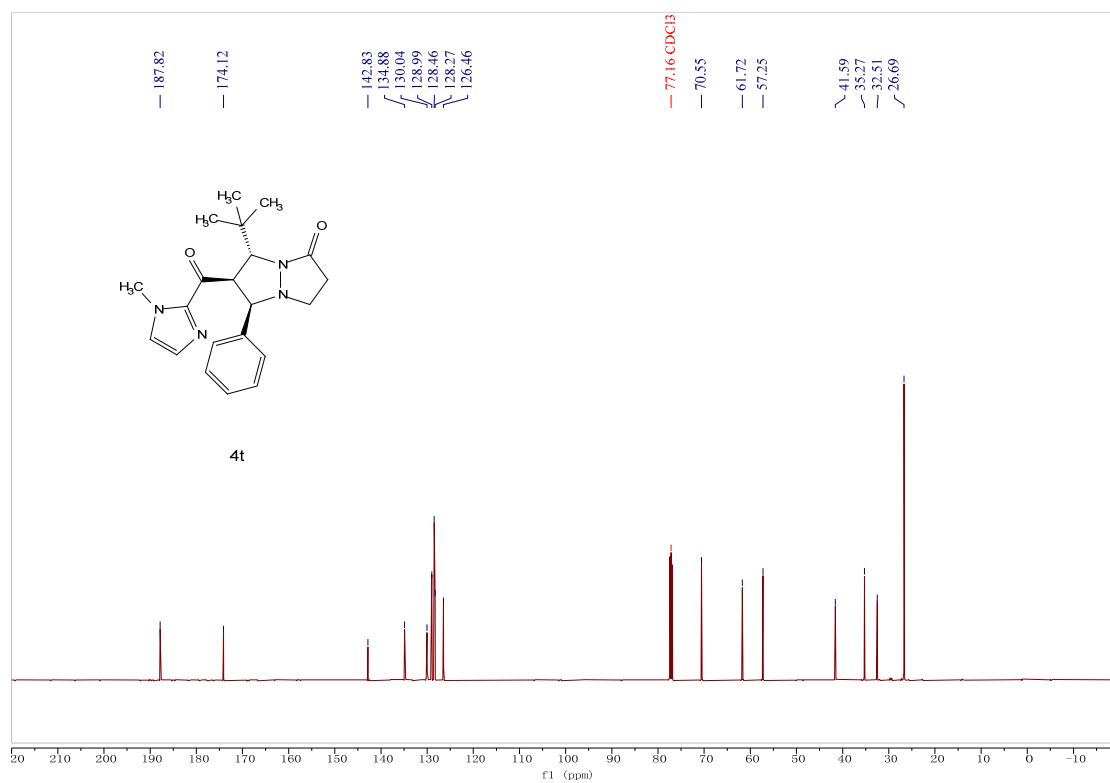

**Figure S20.** <sup>1</sup>H and <sup>13</sup>C NMR spectrum of 4t.

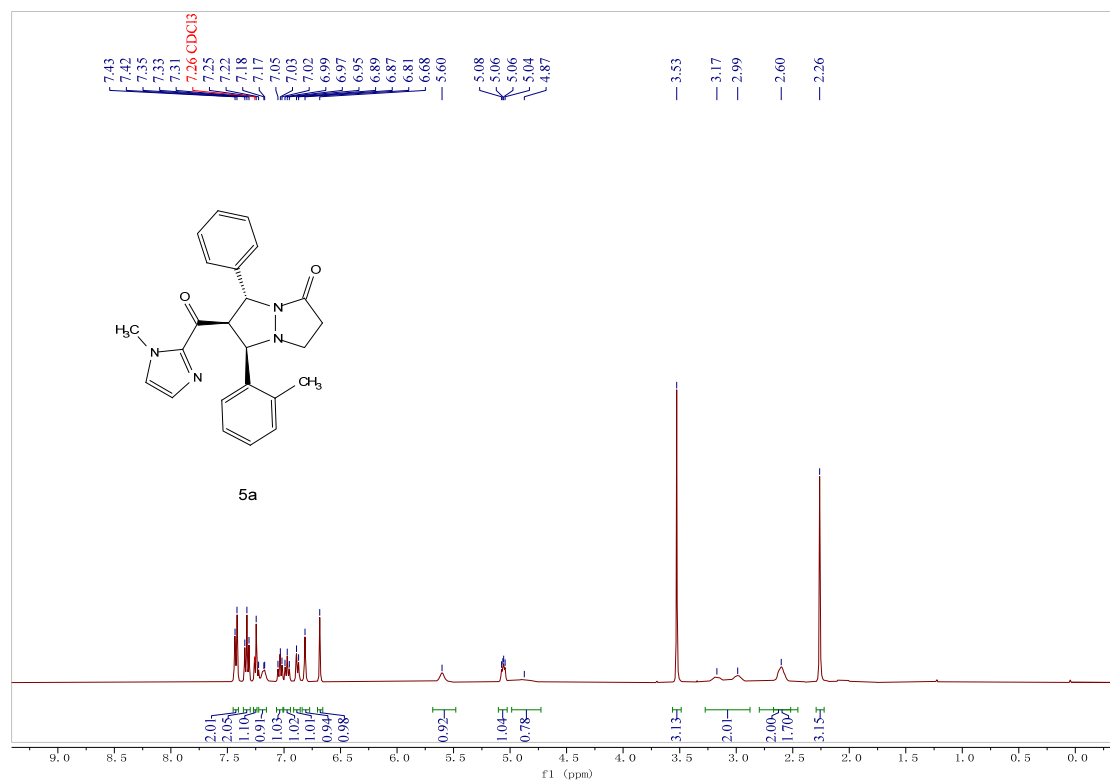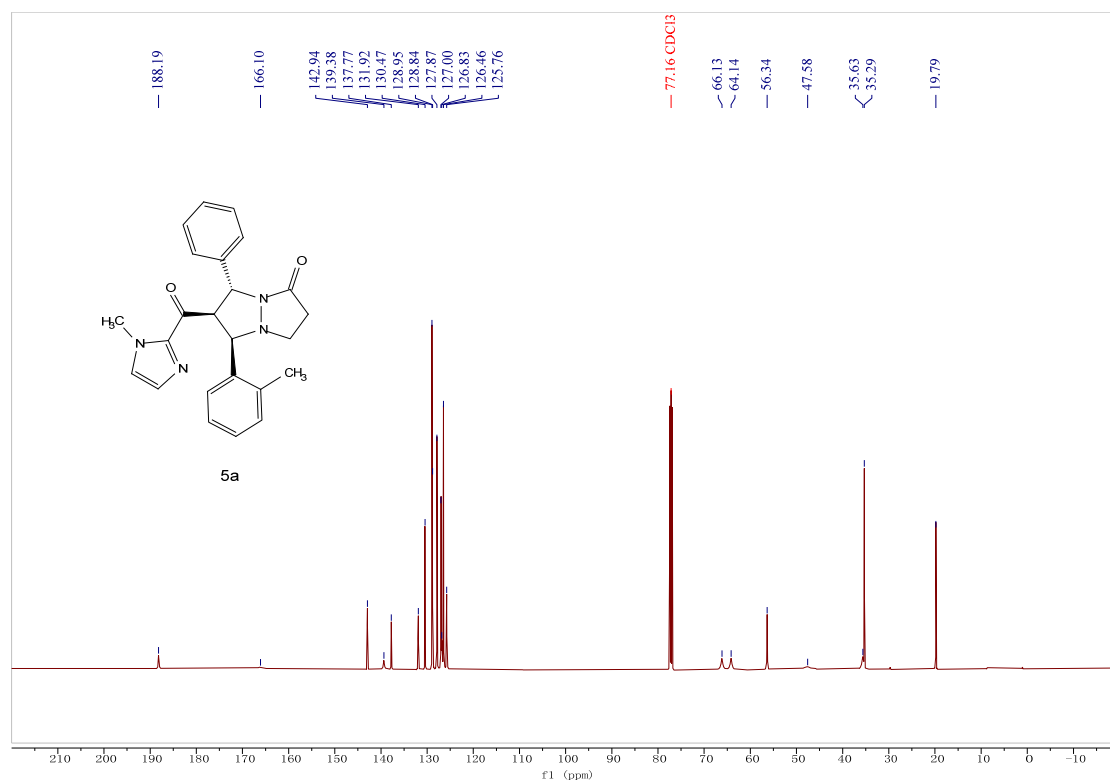

**Figure S21.** <sup>1</sup>H and <sup>13</sup>C NMR spectrum of **5a**.

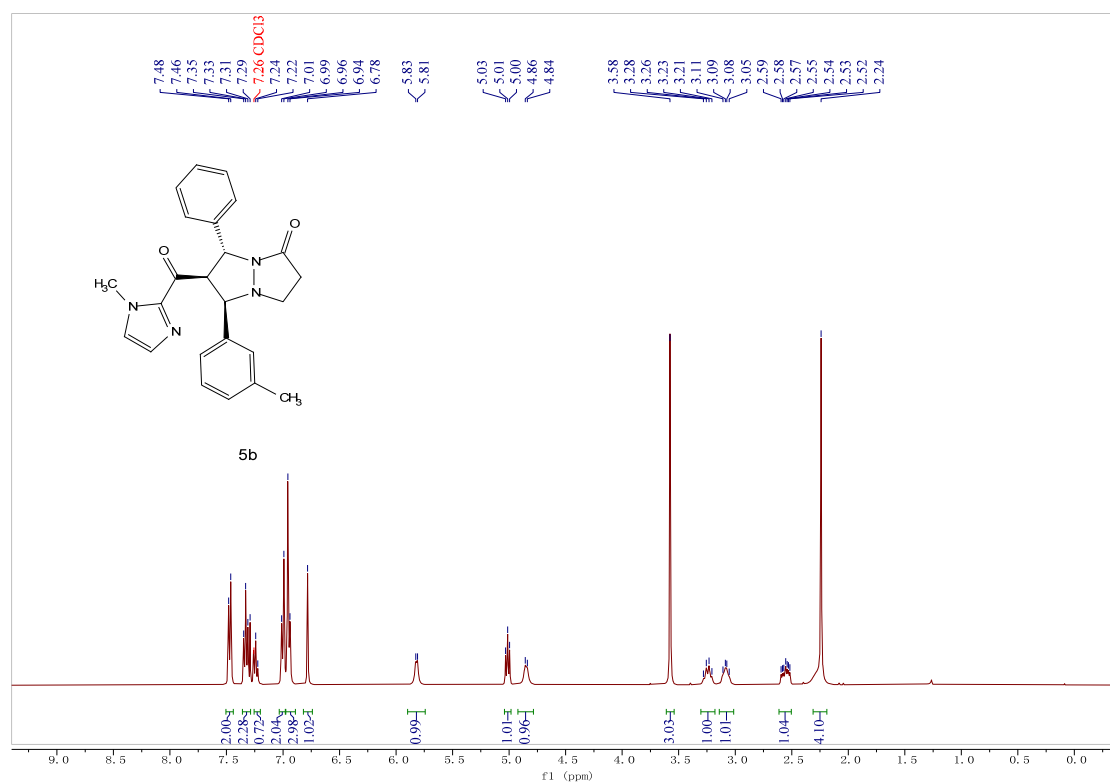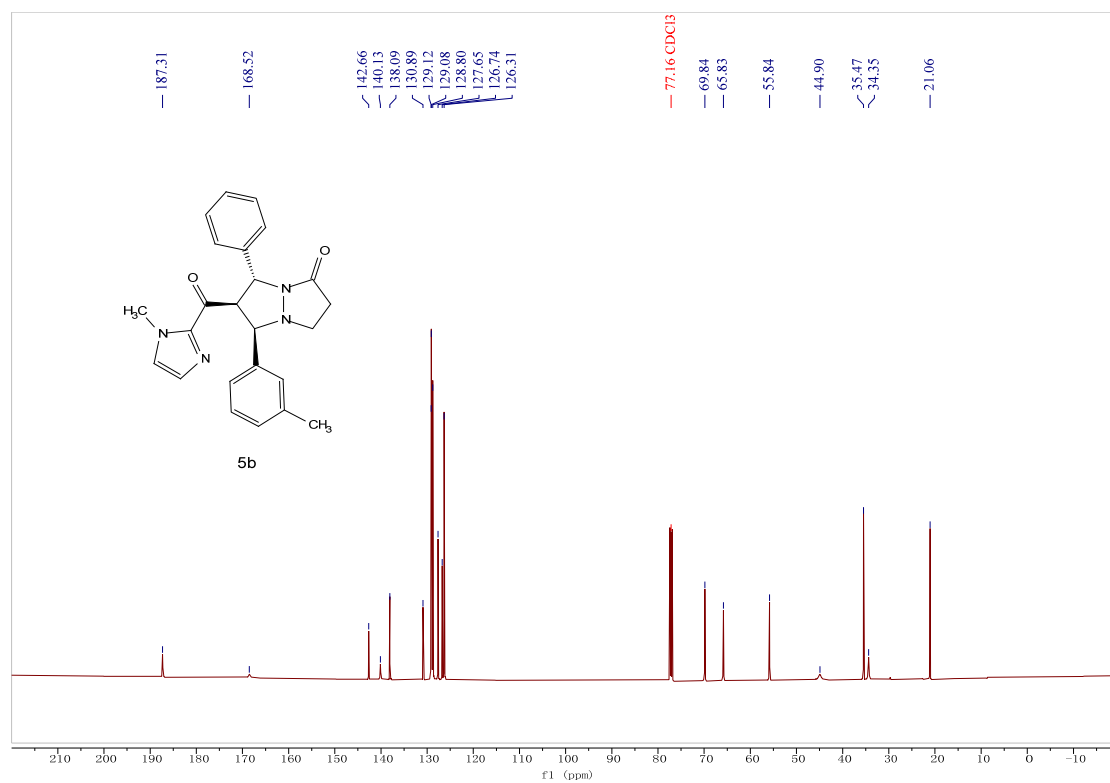

**Figure S22.** <sup>1</sup>H and <sup>13</sup>C NMR spectrum of **5b**.



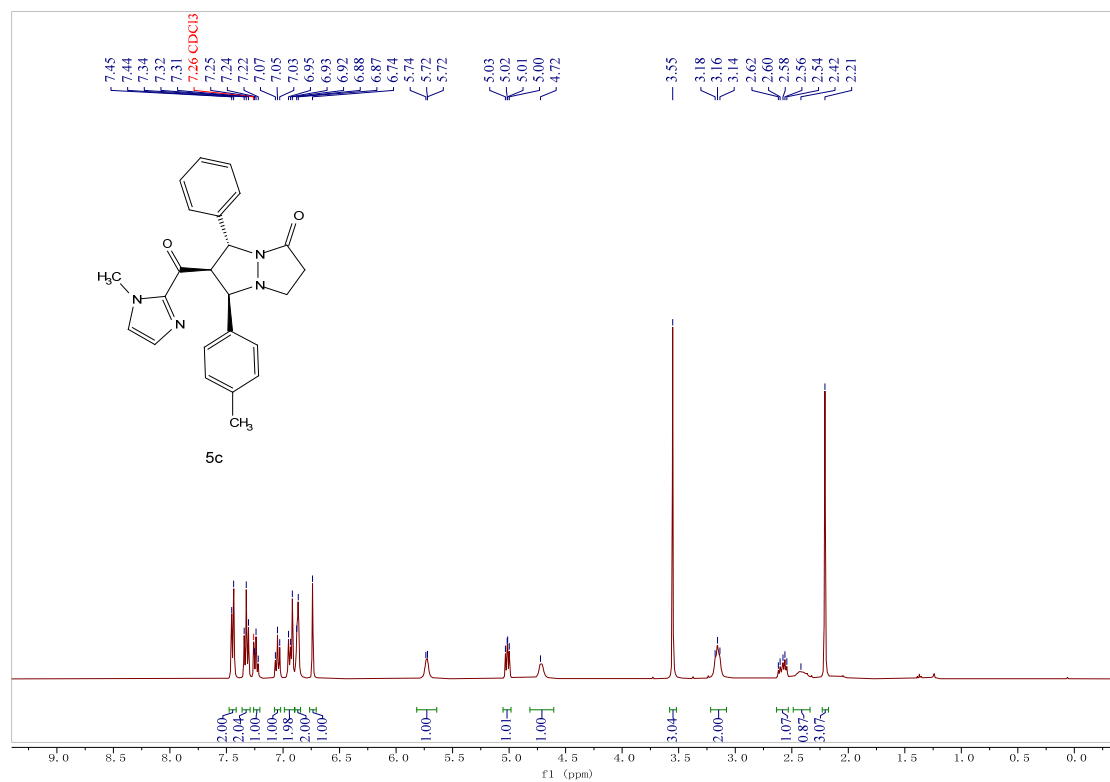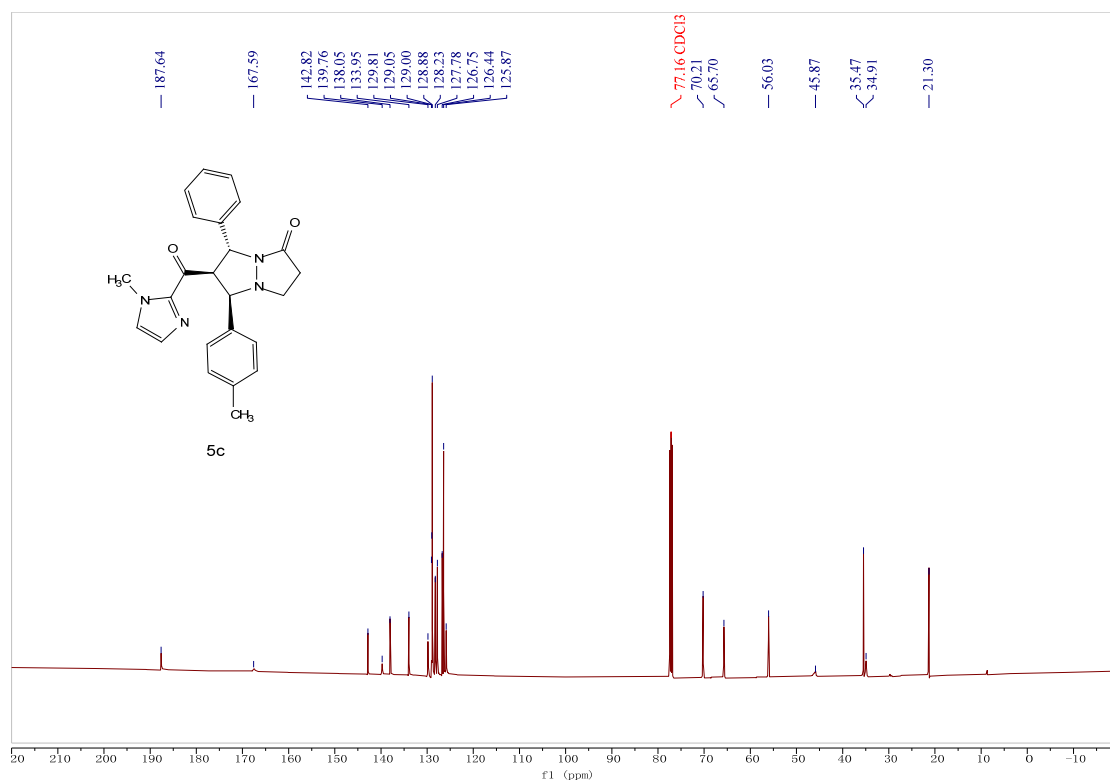

Figure S23. <sup>1</sup>H and <sup>13</sup>C NMR spectrum of 5c.

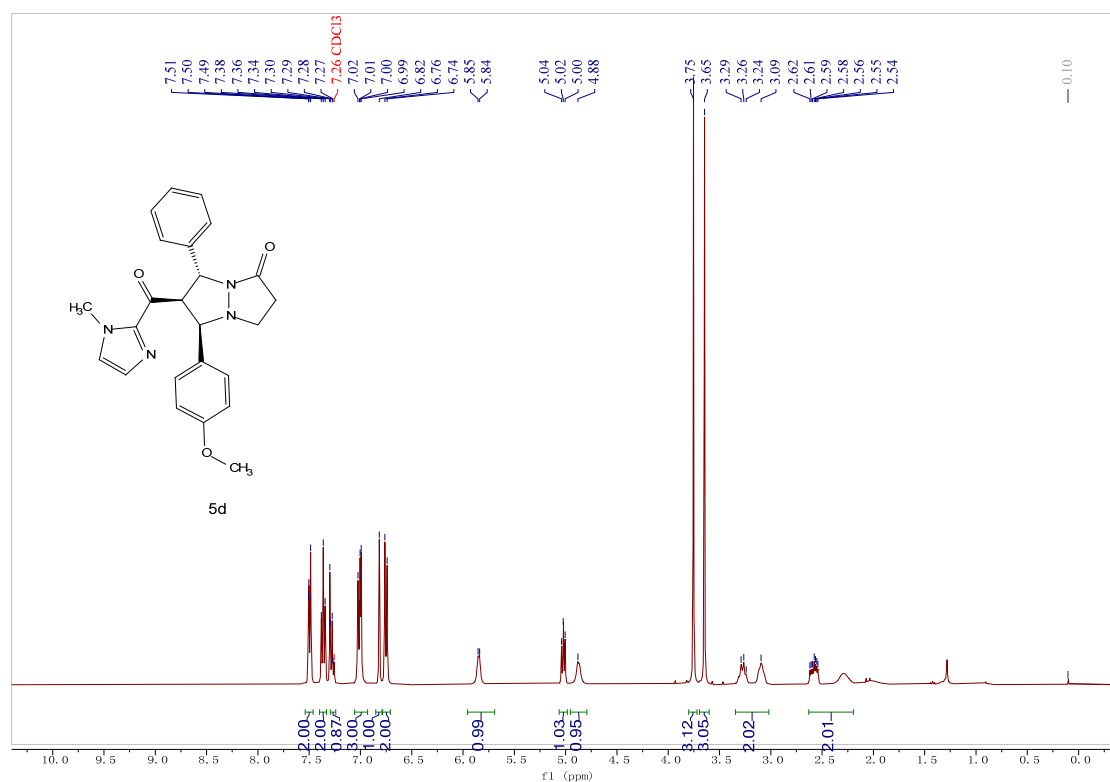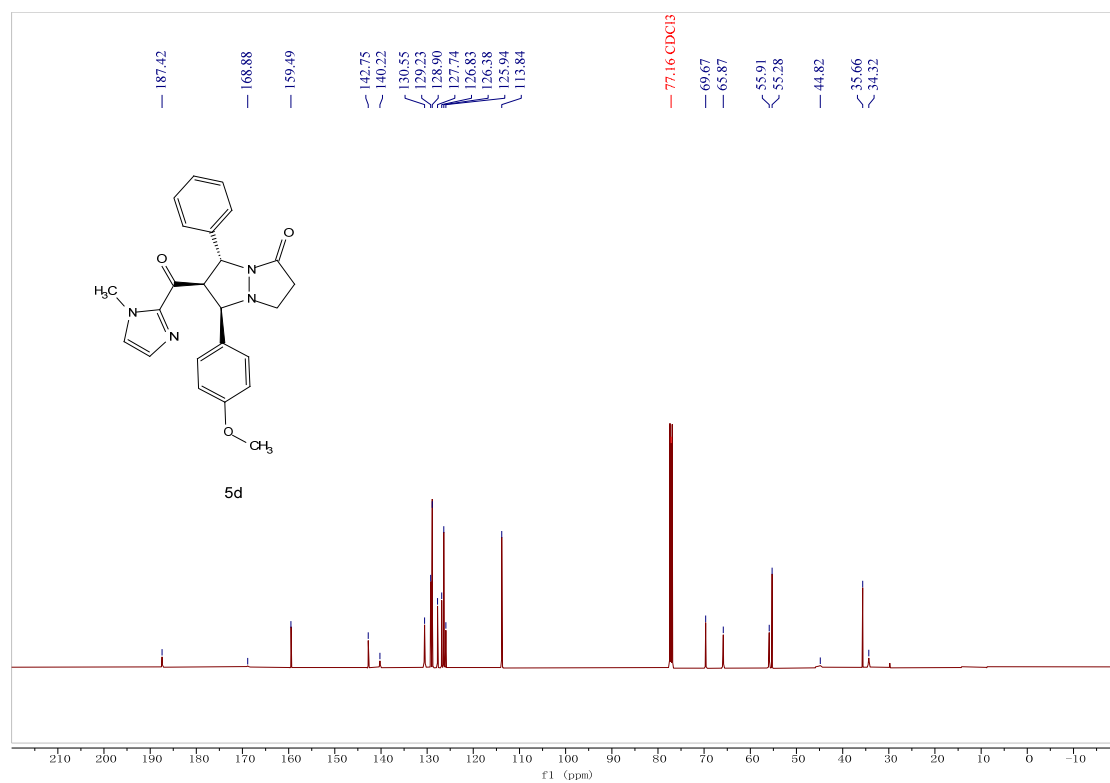

**Figure S24.** <sup>1</sup>H and <sup>13</sup>C NMR spectrum of 5d.

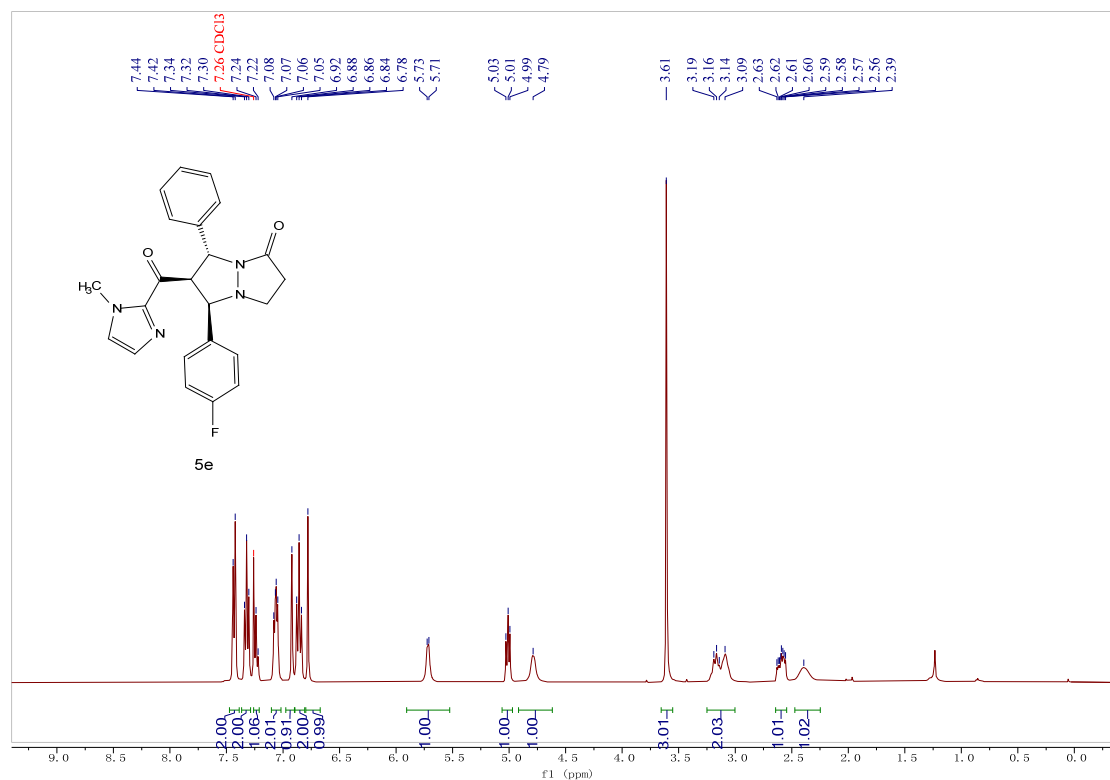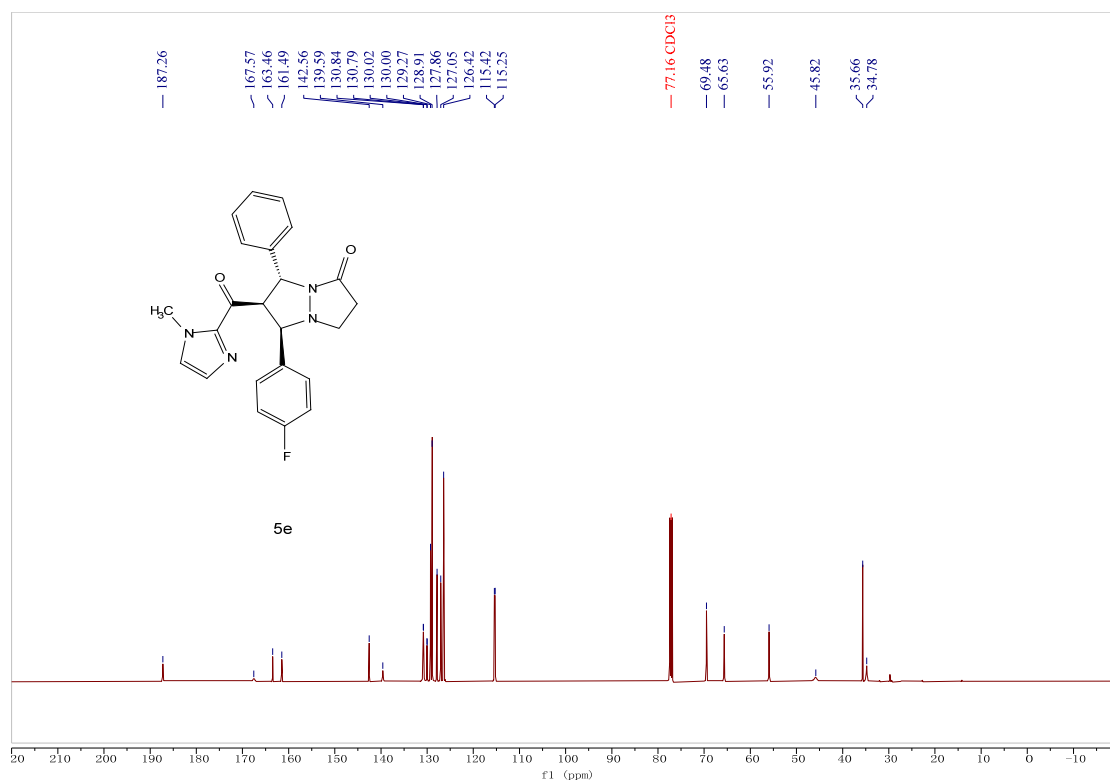

**Figure S25.** <sup>1</sup>H and <sup>13</sup>C NMR spectrum of 5e.

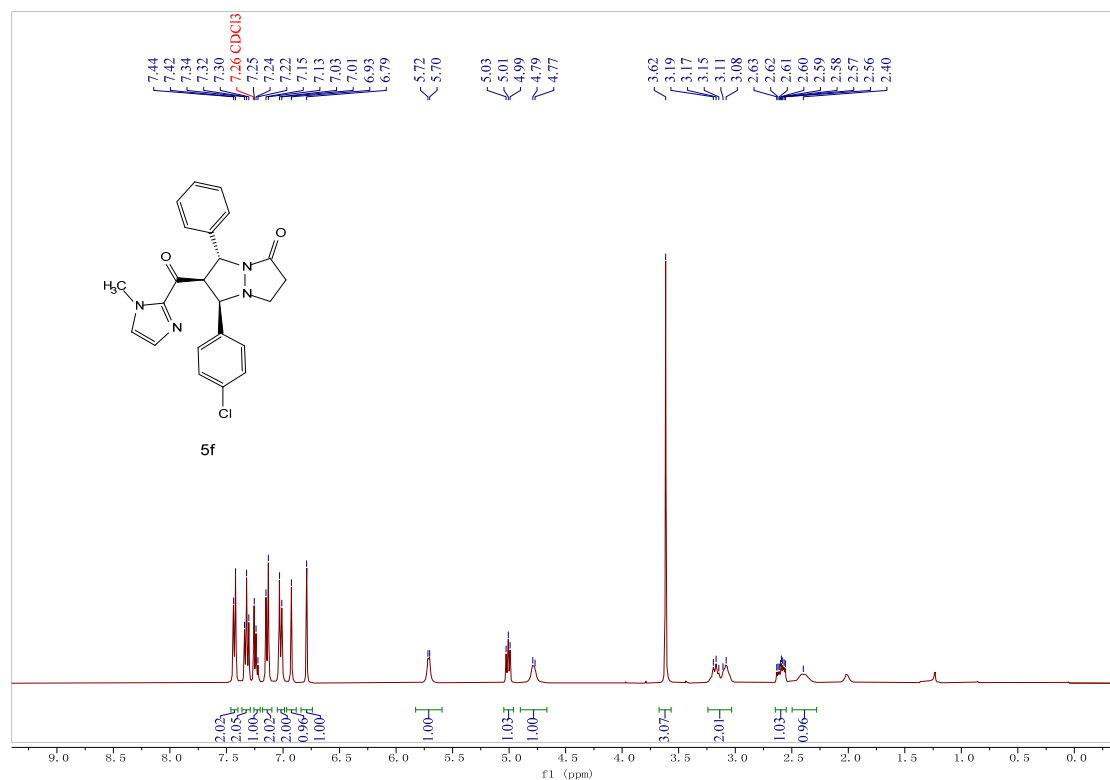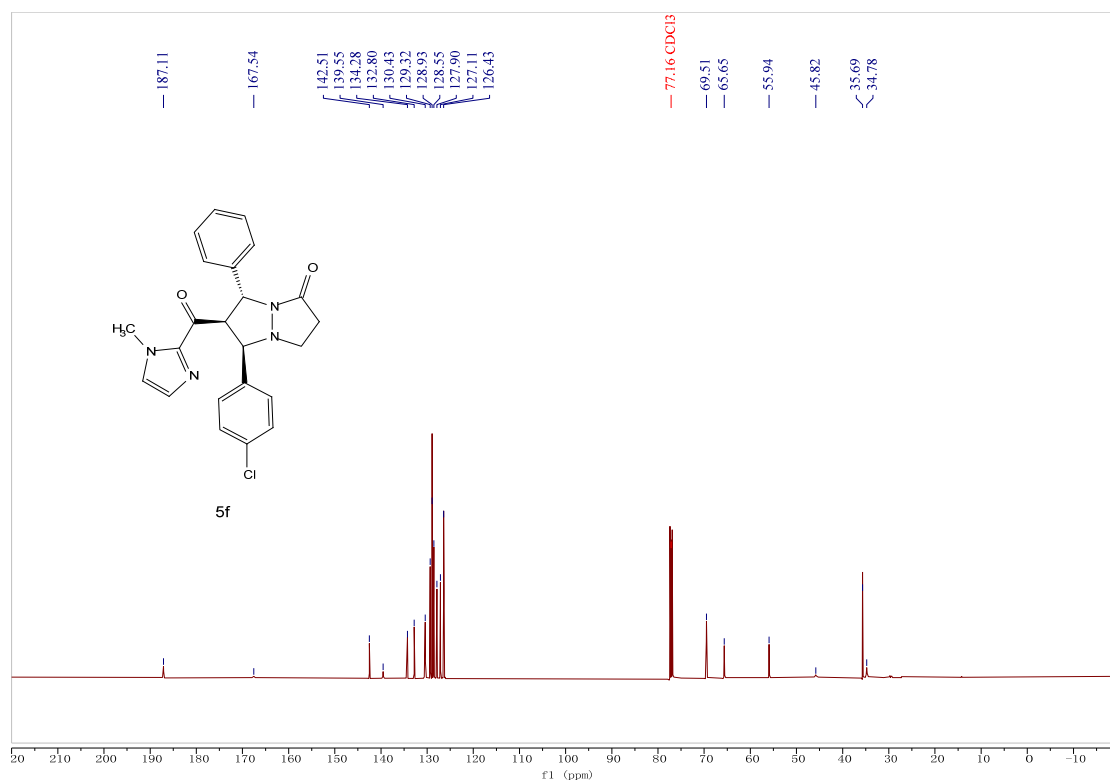

**Figure S26.** <sup>1</sup>H and <sup>13</sup>C NMR spectrum of of **5f**.

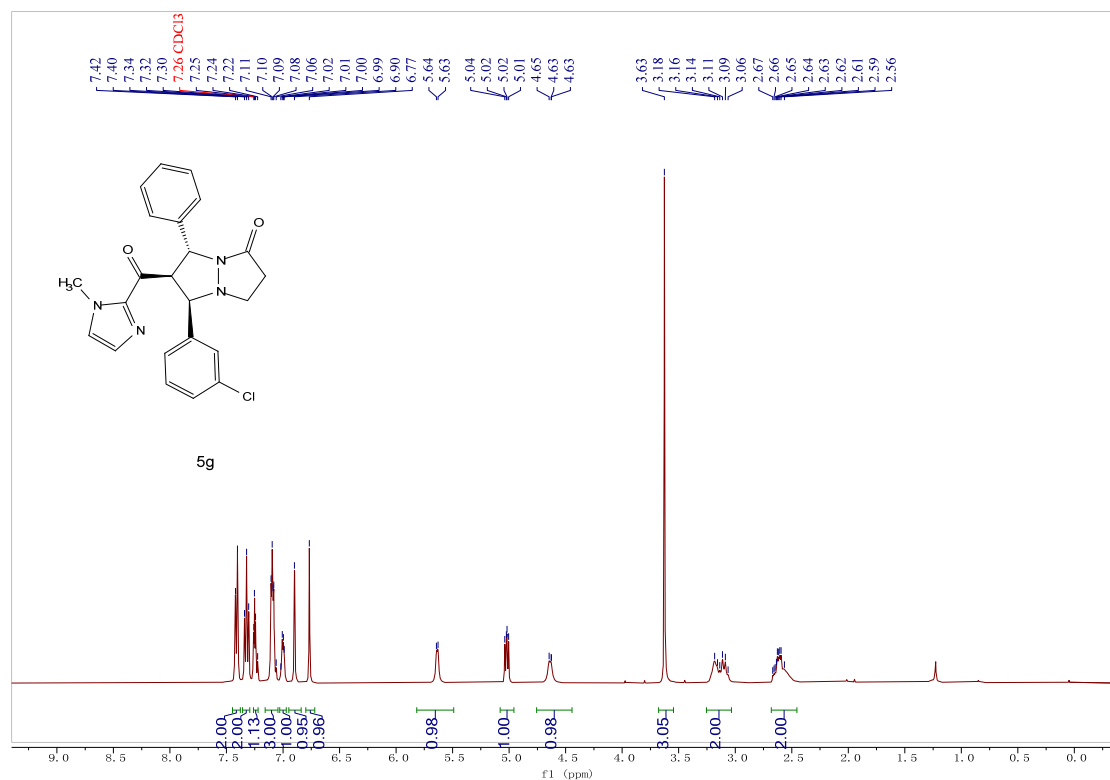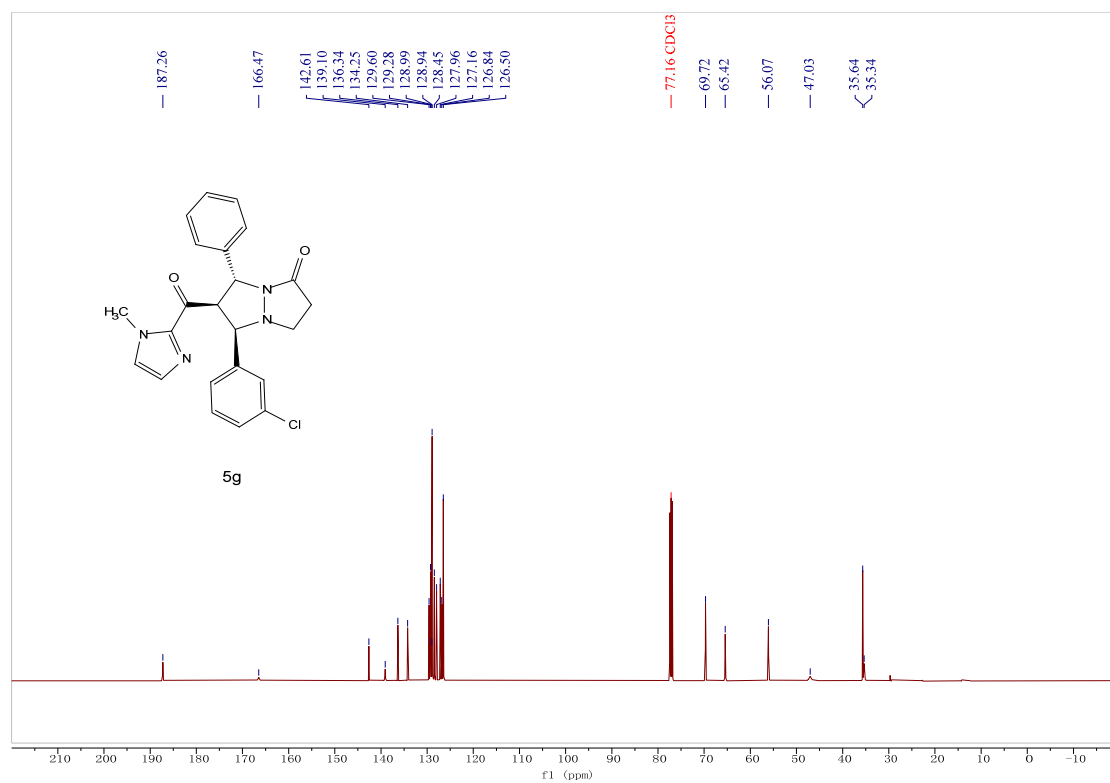

**Figure S27.** <sup>1</sup>H and <sup>13</sup>C NMR spectrum of of **5g**.

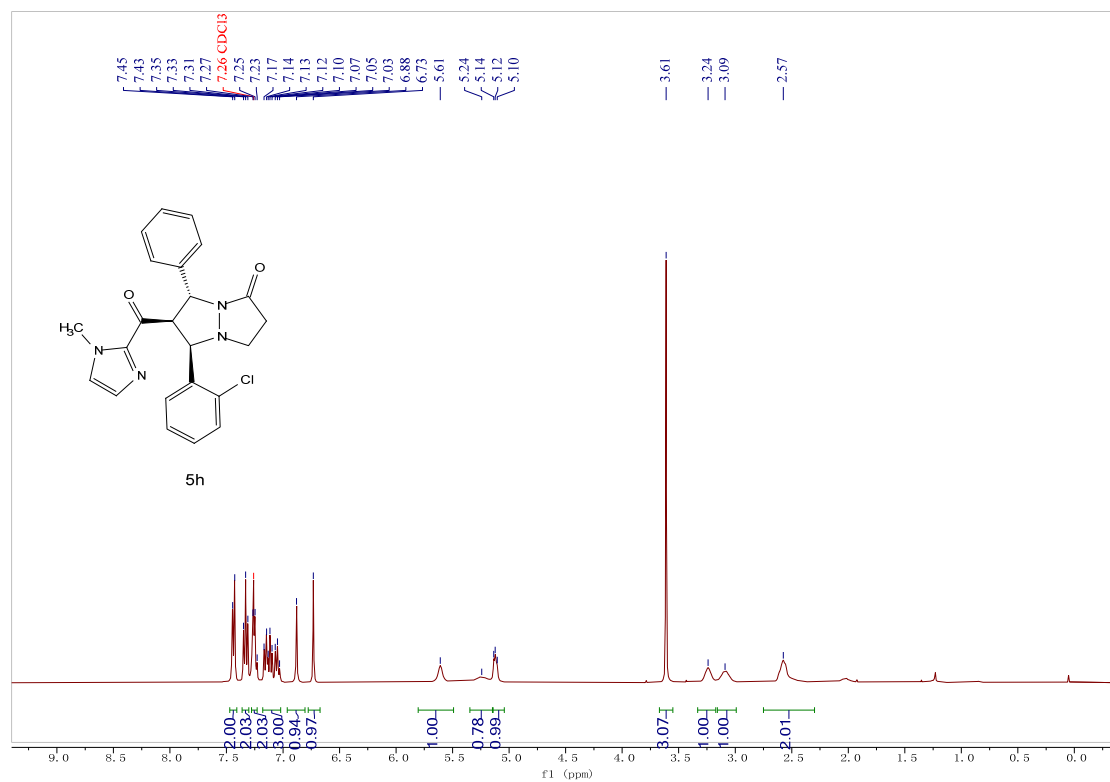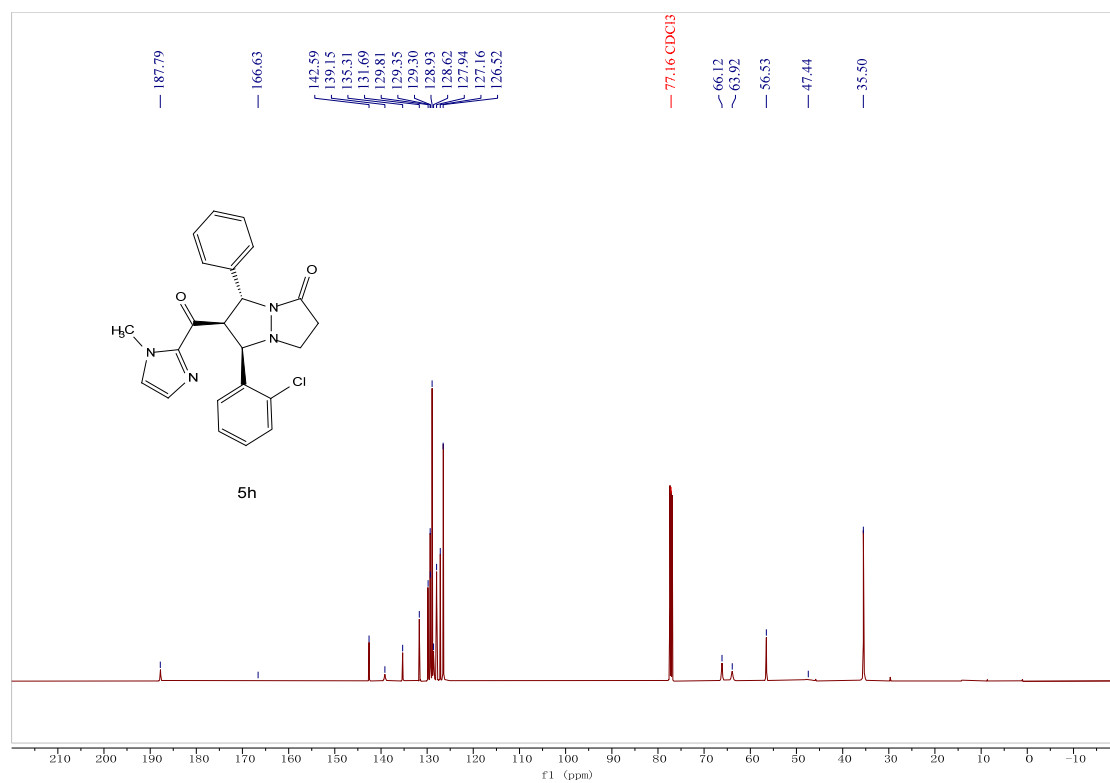

**Figure S28.** <sup>1</sup>H and <sup>13</sup>C NMR spectrum of of **5h**.

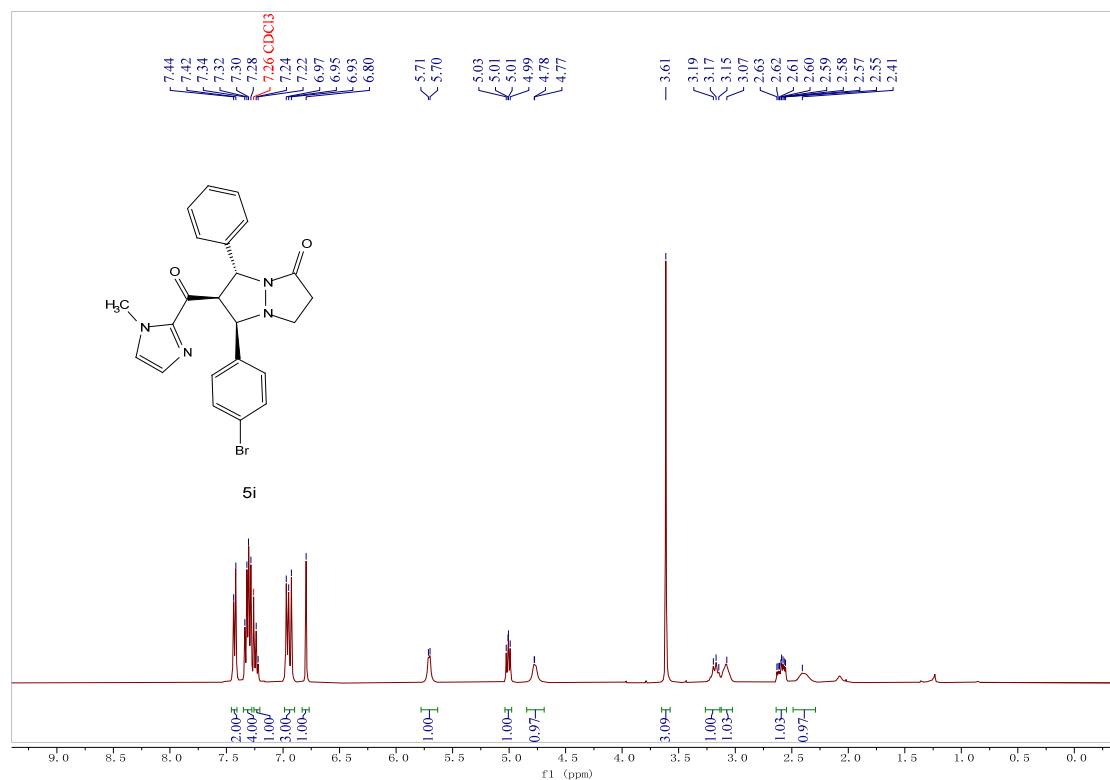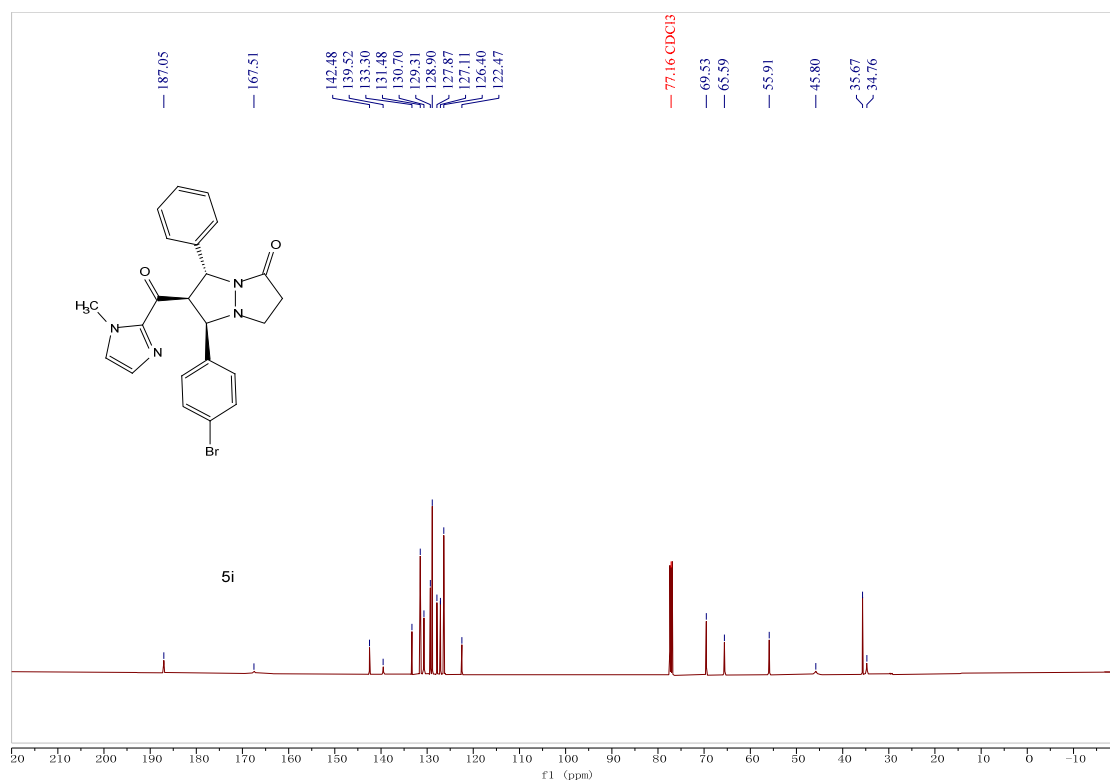

**Figure S29.** <sup>1</sup>H and <sup>13</sup>C NMR spectrum of **5i**.

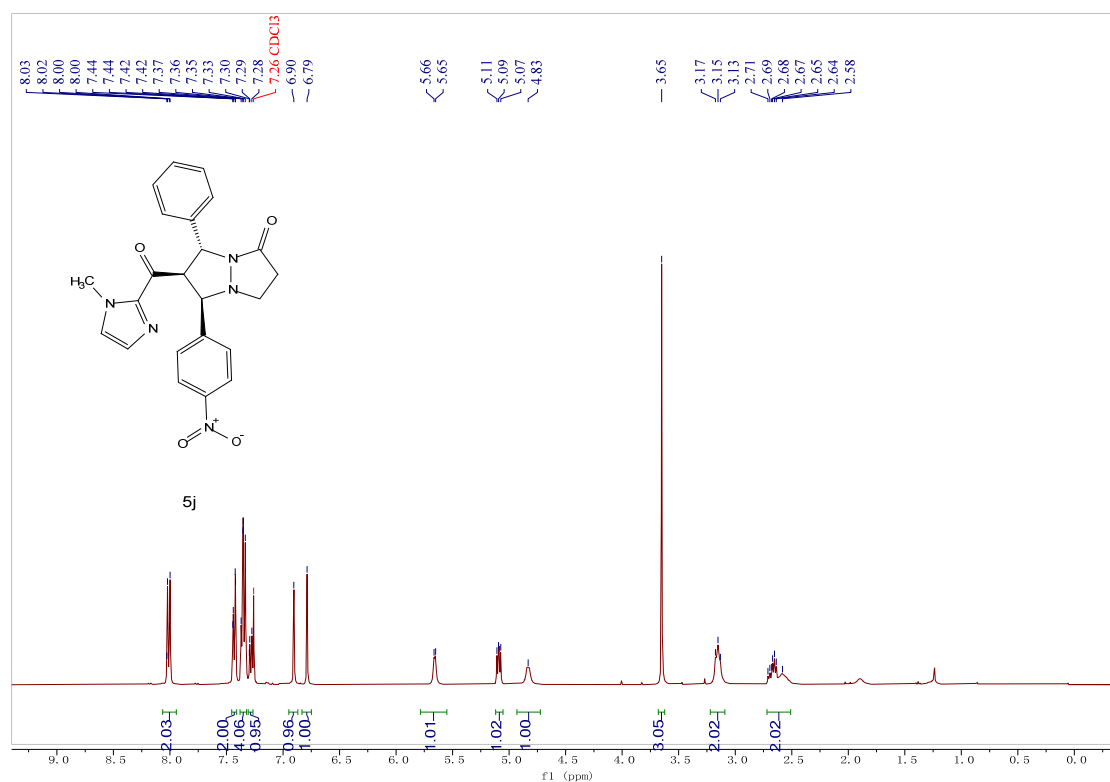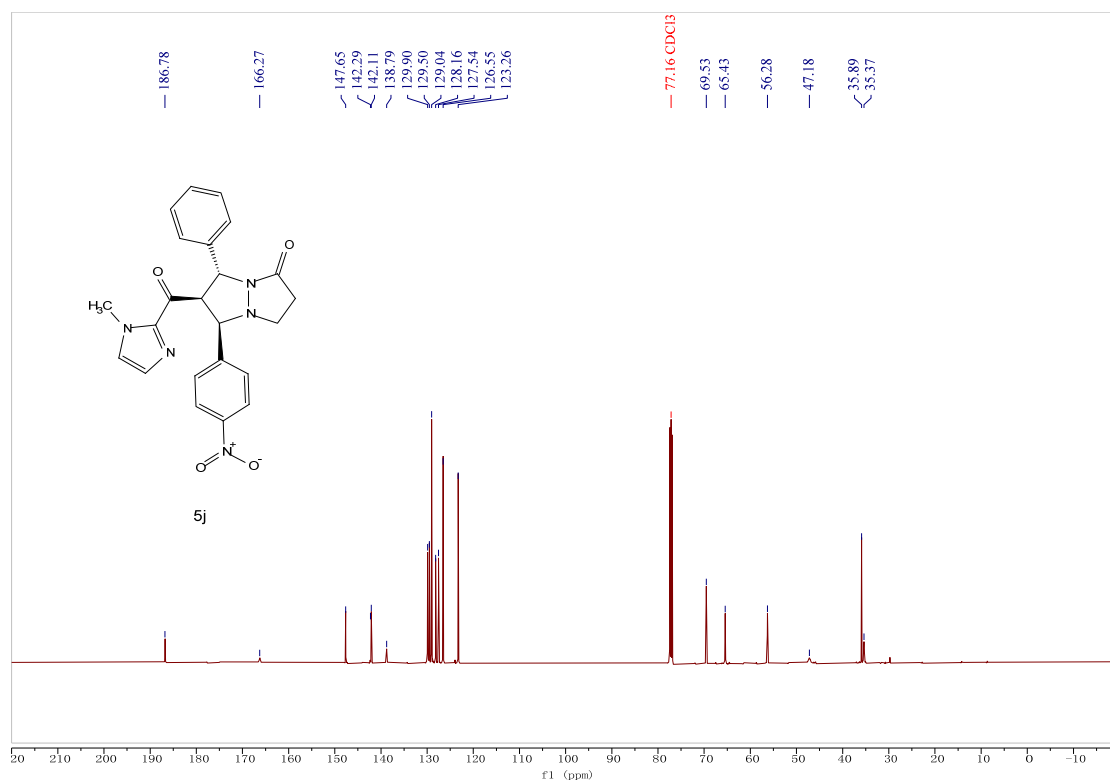

**Figure S30.** <sup>1</sup>H and <sup>13</sup>C NMR spectrum of **5j**.



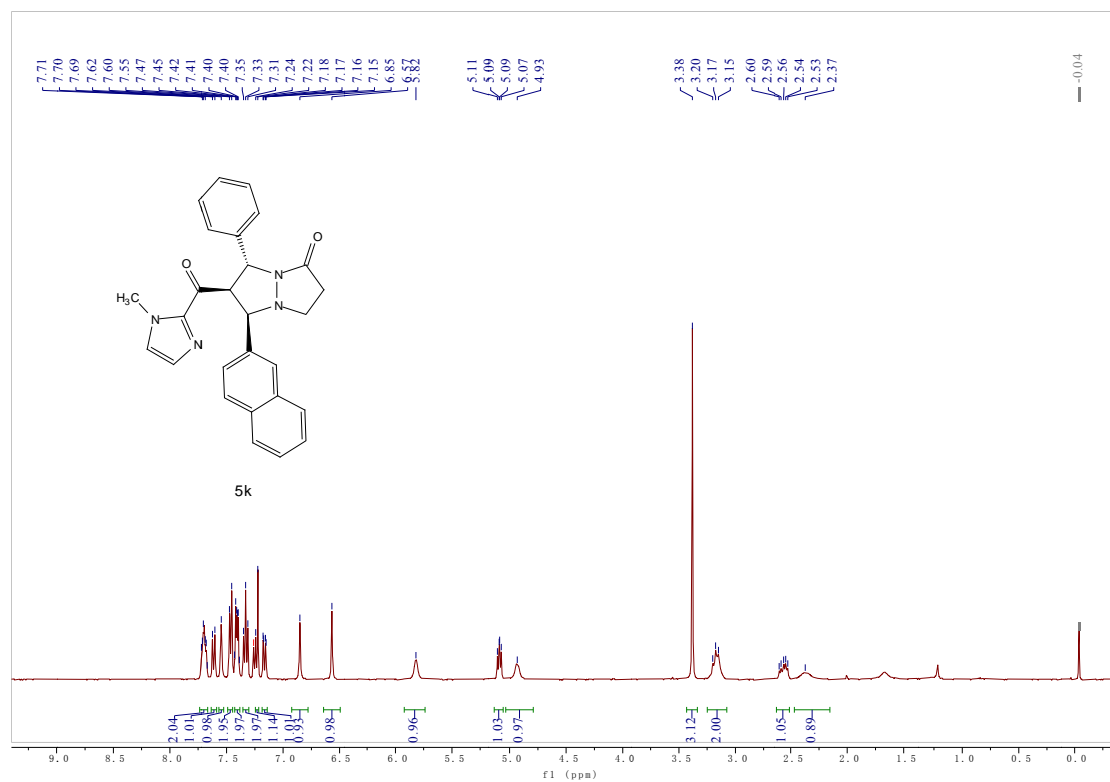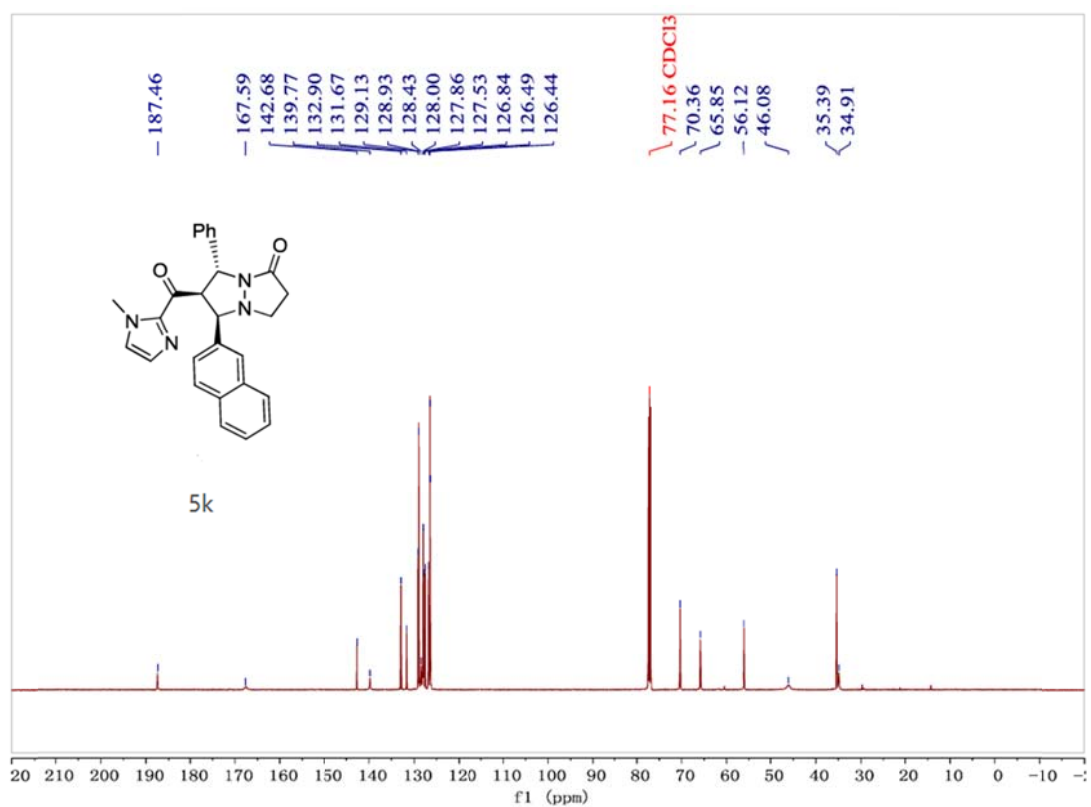

**Figure S31.** <sup>1</sup>H and <sup>13</sup>C NMR spectrum of **5k**.

\

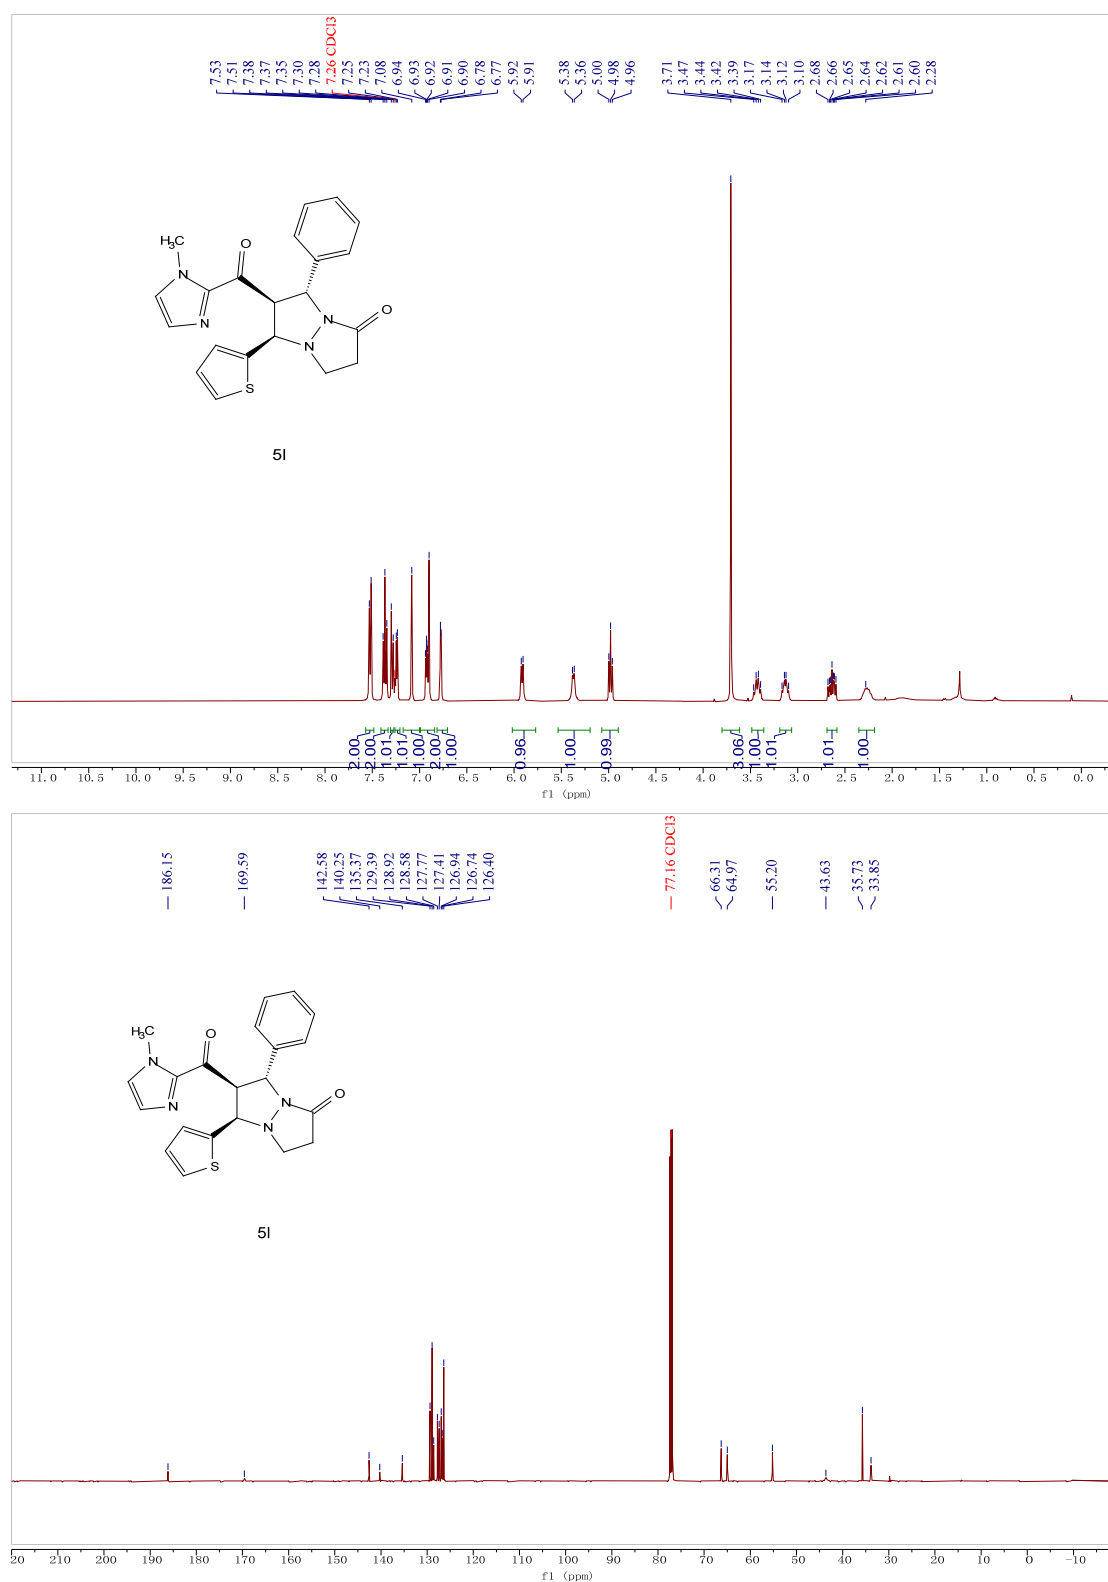

**Figure S32.** <sup>1</sup>H and <sup>13</sup>C NMR spectrum of **51**.

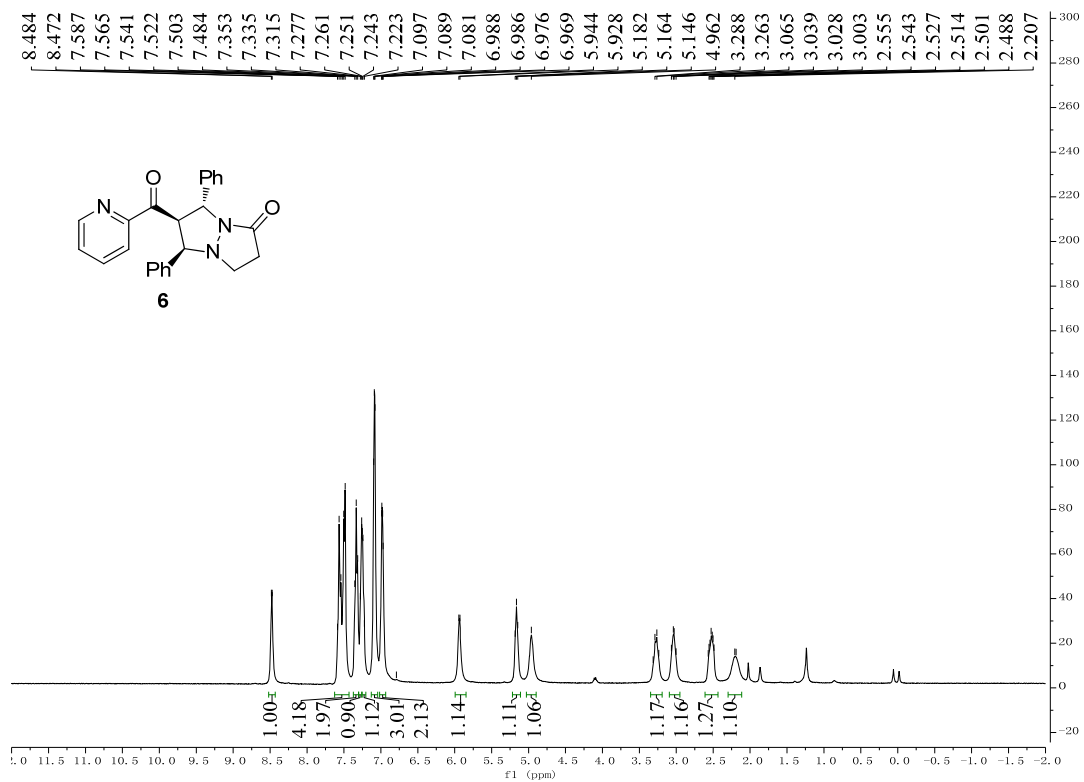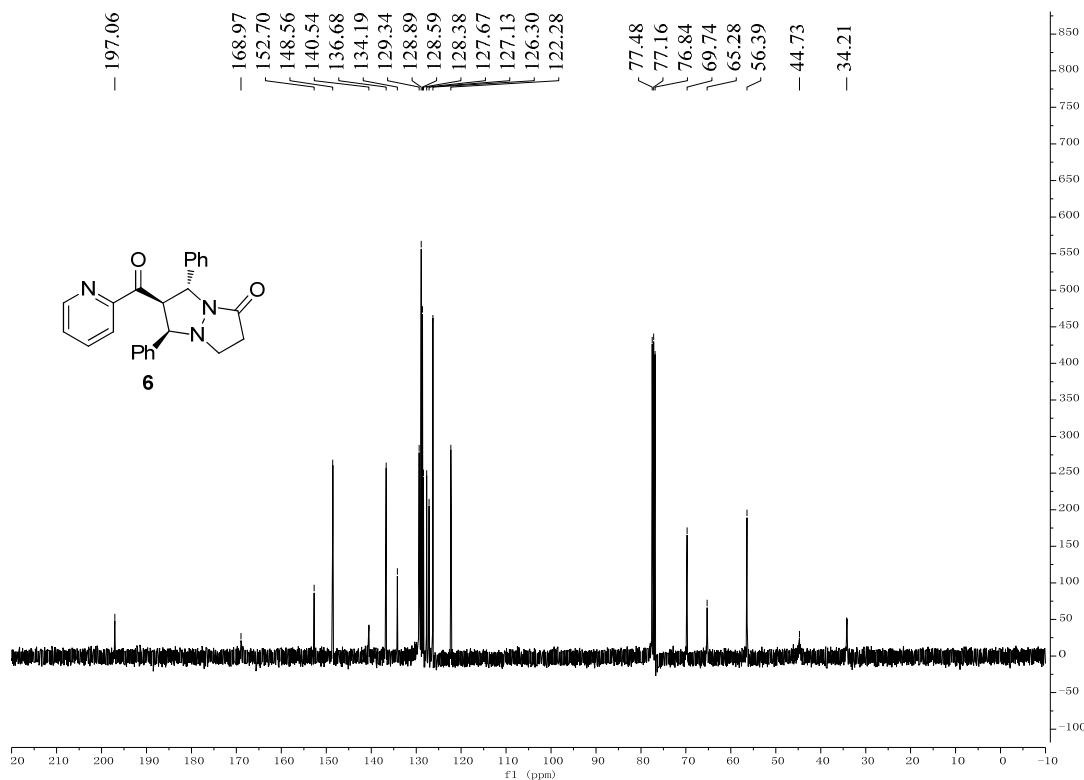

**Figure S33.** <sup>1</sup>H and <sup>13</sup>C NMR spectrum of **6**.

## 6. HPLC Traces on Chiral Stationary Phase

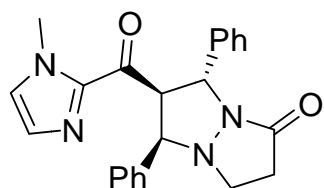

4a

Racemic 4a:

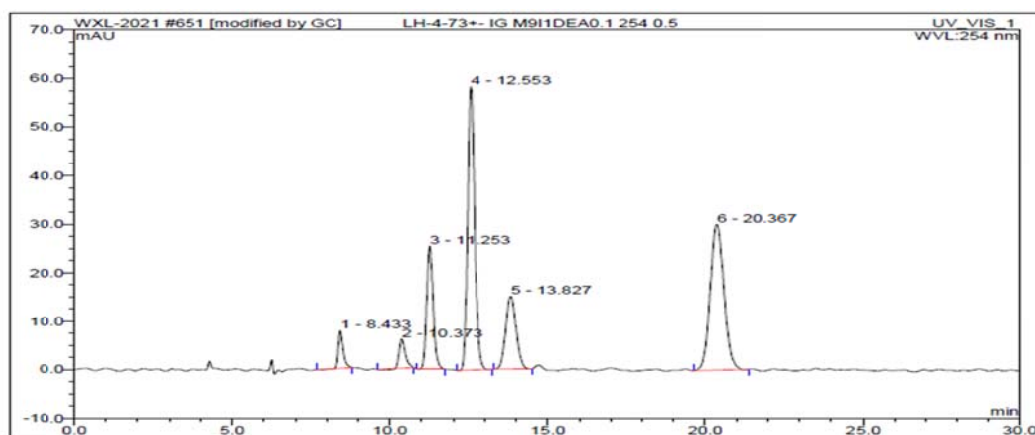

| No.           | Ret.Time<br>min | Peak Name | Height<br>mAU | Area<br>mAU*min | Rel.Area<br>% | Amount | Type |
|---------------|-----------------|-----------|---------------|-----------------|---------------|--------|------|
| 1             | 8.43            | n.a.      | 7.786         | 1.358           | 3.02          | n.a.   | BMB* |
| 2             | 10.37           | n.a.      | 6.076         | 1.310           | 2.92          | n.a.   | BMB* |
| 3             | 11.25           | n.a.      | 25.381        | 5.983           | 13.33         | n.a.   | BMB* |
| 4             | 12.55           | n.a.      | 58.484        | 15.278          | 34.02         | n.a.   | BMB* |
| 5             | 13.83           | n.a.      | 14.986        | 5.775           | 12.86         | n.a.   | BMB* |
| 6             | 20.37           | n.a.      | 30.098        | 15.197          | 33.85         | n.a.   | BMB* |
| <b>Total:</b> |                 |           | 142.810       | 44.902          | 100.00        | 0.000  |      |

Chiral 4a:

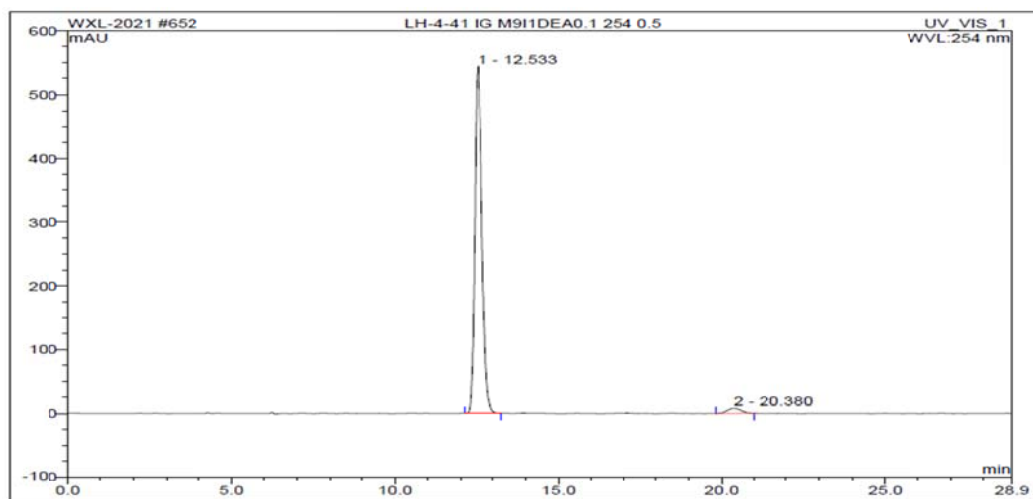

| No.           | Ret.Time<br>min | Peak Name | Height<br>mAU  | Area<br>mAU*min | Rel.Area<br>% | Amount       | Type |
|---------------|-----------------|-----------|----------------|-----------------|---------------|--------------|------|
| 1             | 12.53           | n.a.      | 544.368        | 144.325         | 97.35         | n.a.         | BMB  |
| 2             | 20.38           | n.a.      | 8.009          | 3.922           | 2.65          | n.a.         | BMB  |
| <b>Total:</b> |                 |           | <b>552.377</b> | <b>148.247</b>  | <b>100.00</b> | <b>0.000</b> |      |

**Figure S33.** HPLC traces of racemic **4a** (reference) and chiral **4a**. Area integration = 97.35: 2.65 (95% *ee*).

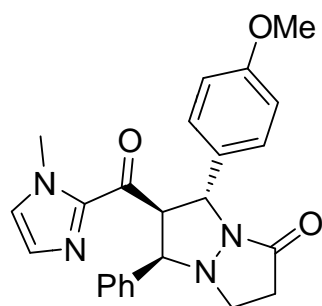

**4b**

Racemic **4b**:

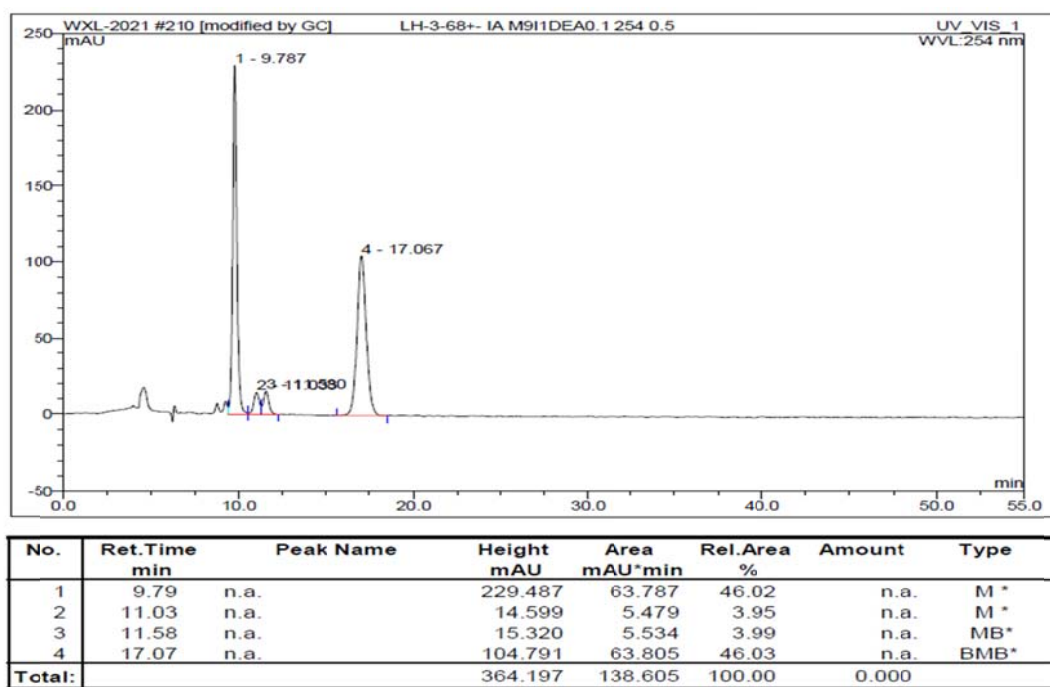

Chiral 4b:

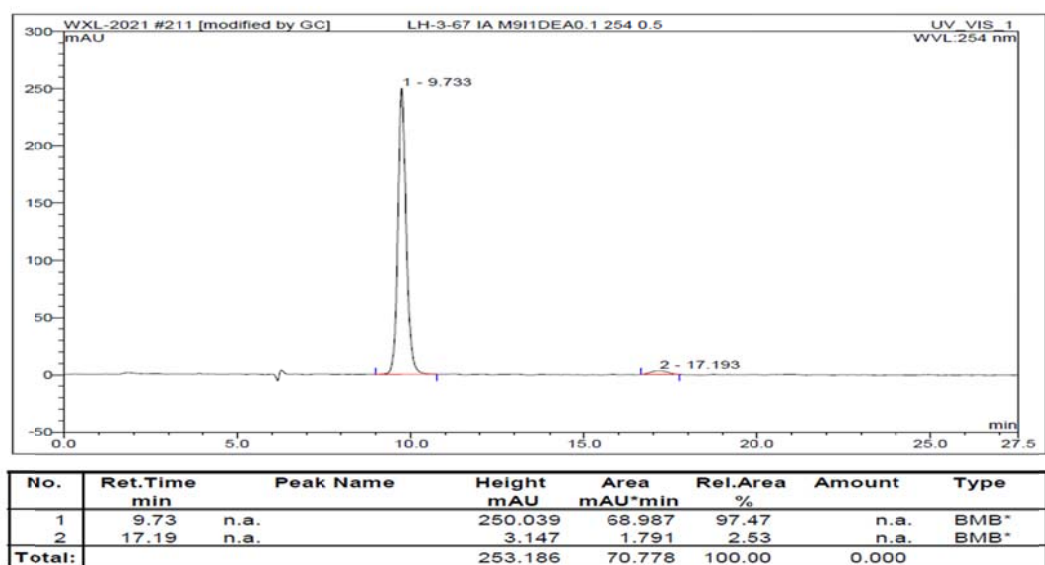

Figure S34. HPLC traces of racemic **4b** (reference) and chiral **4b**. Area integration = 97.47:2.53 (95% *ee*).

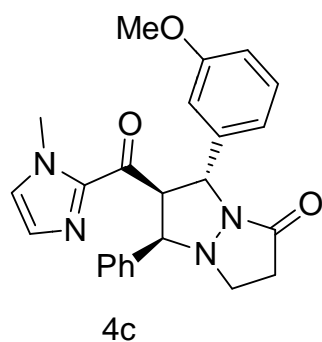

Racemic **4c**:

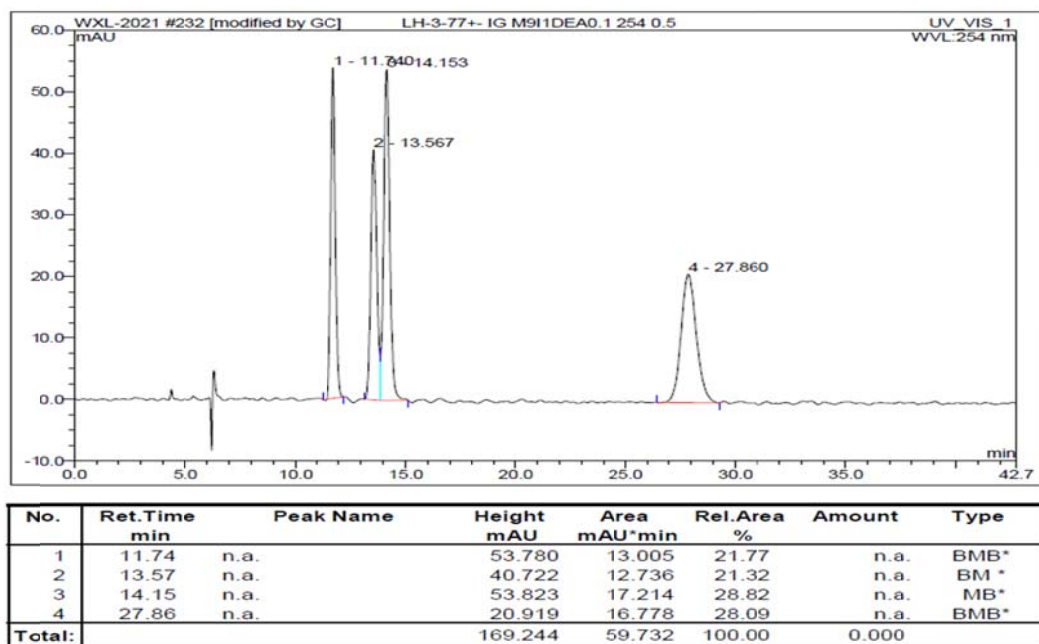

Chiral **3c**:

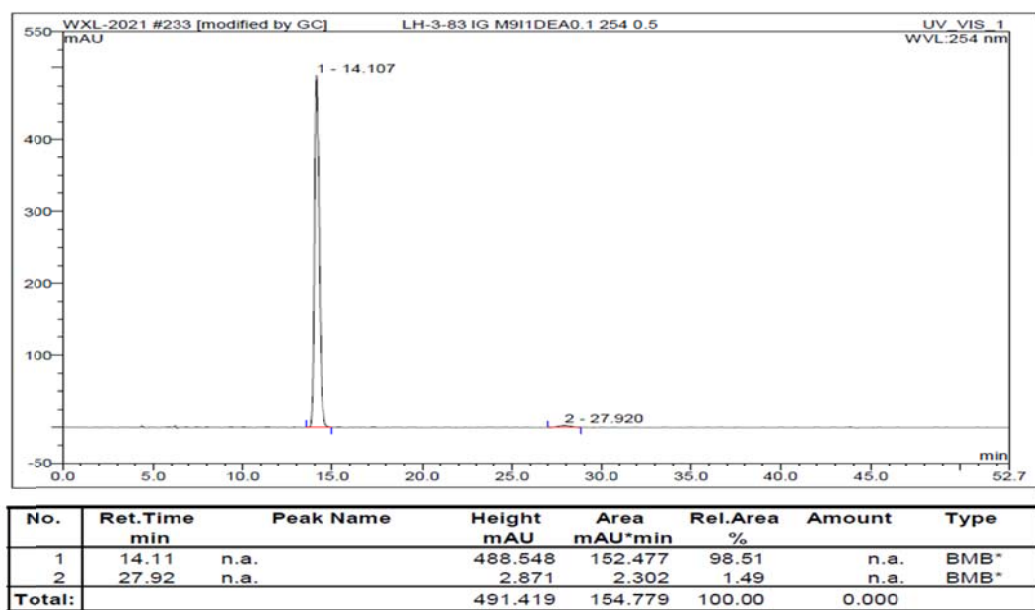

**Figure S35.** HPLC traces of racemic **4c** (reference) and chiral **4c**. Area integration = 98.51:1.49 (97% *ee*).

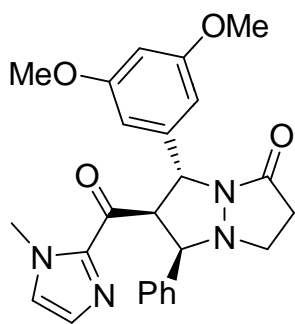

4d

Racemic 4d:

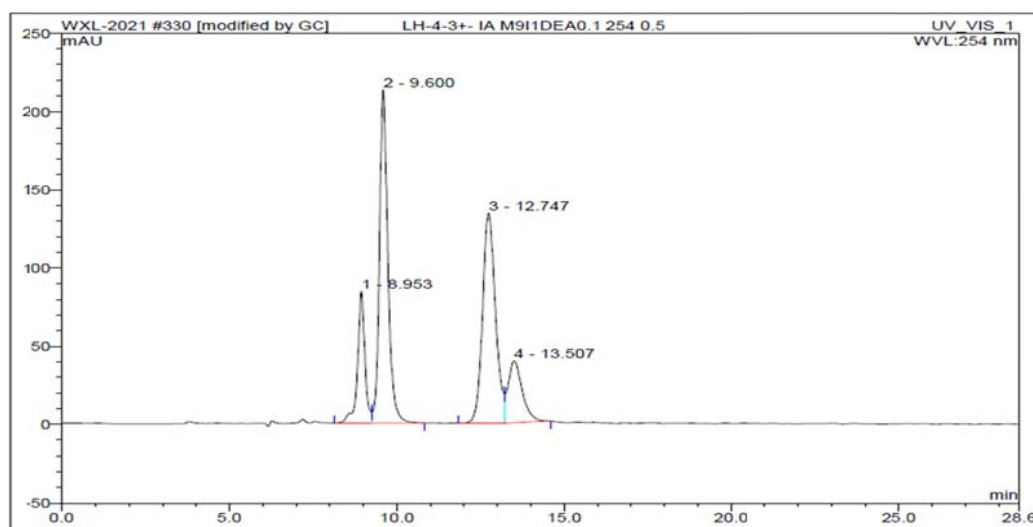

| No.           | Ret.Time<br>min | Peak Name | Height<br>mAU  | Area<br>mAU*min | Rel.Area<br>% | Amount       | Type |
|---------------|-----------------|-----------|----------------|-----------------|---------------|--------------|------|
| 1             | 8.95            | n.a.      | 84.733         | 21.419          | 13.16         | n.a.         | BM * |
| 2             | 9.60            | n.a.      | 213.244        | 61.683          | 37.90         | n.a.         | MB*  |
| 3             | 12.75           | n.a.      | 134.562        | 60.511          | 37.18         | n.a.         | BM * |
| 4             | 13.51           | n.a.      | 39.799         | 19.144          | 11.76         | n.a.         | MB*  |
| <b>Total:</b> |                 |           | <b>472.338</b> | <b>162.757</b>  | <b>100.00</b> | <b>0.000</b> |      |

Chiral 4d:



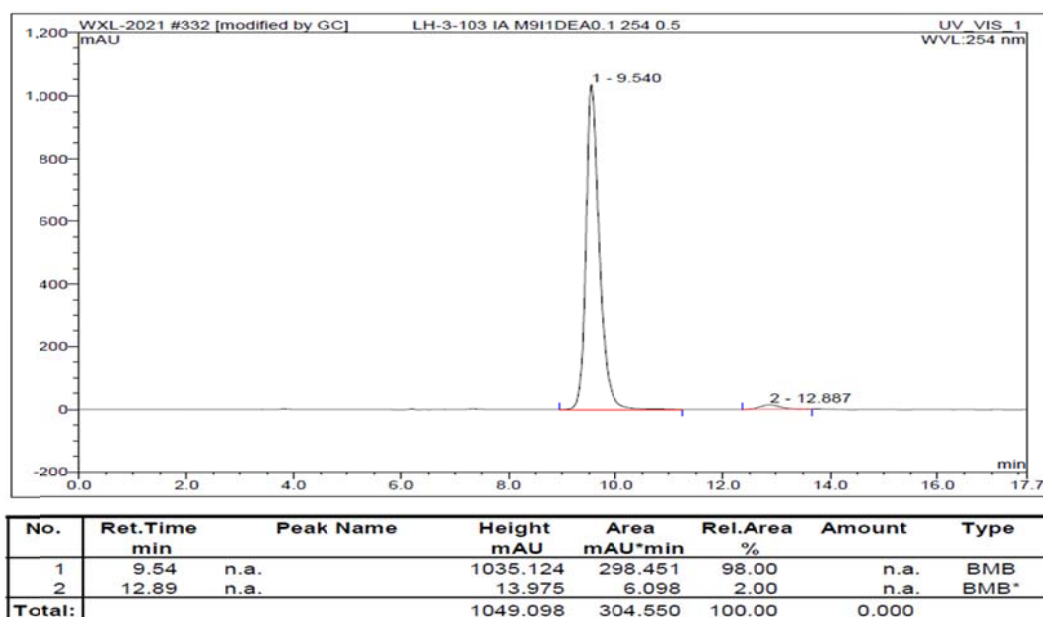

**Figure S36.** HPLC traces of racemic **4d** (reference) and chiral **4d**. Area integration = 98.00:2.00 (96% *ee*).

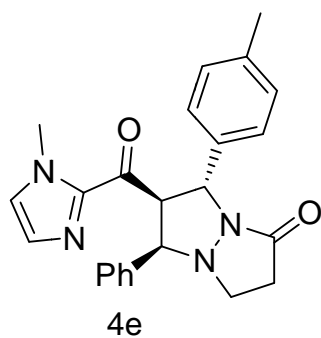

Racemic **4e**:

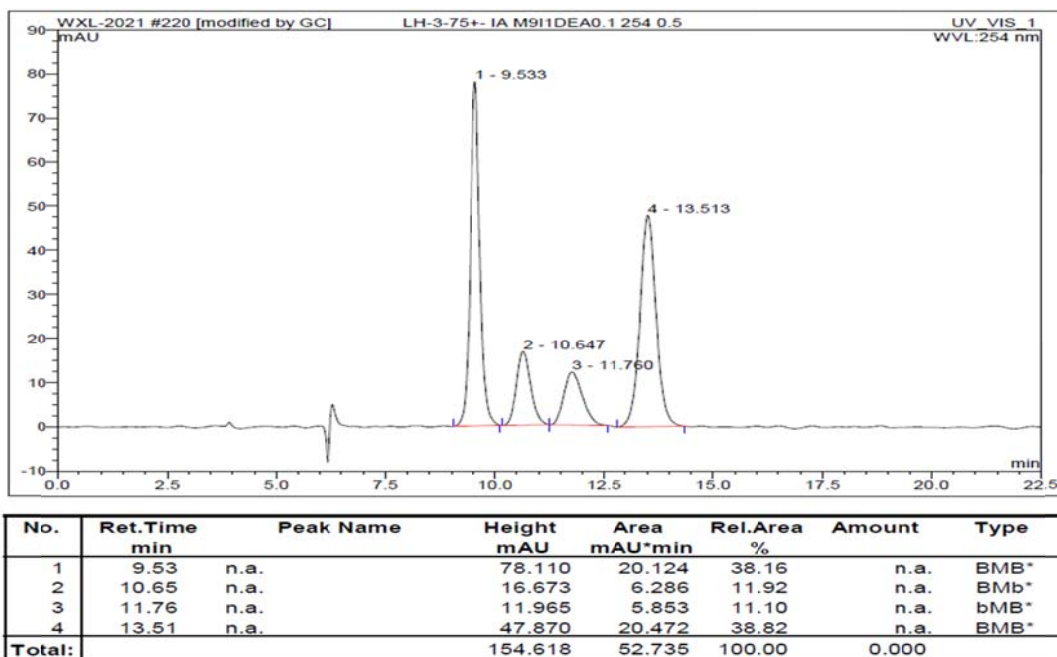

Chiral 4e:

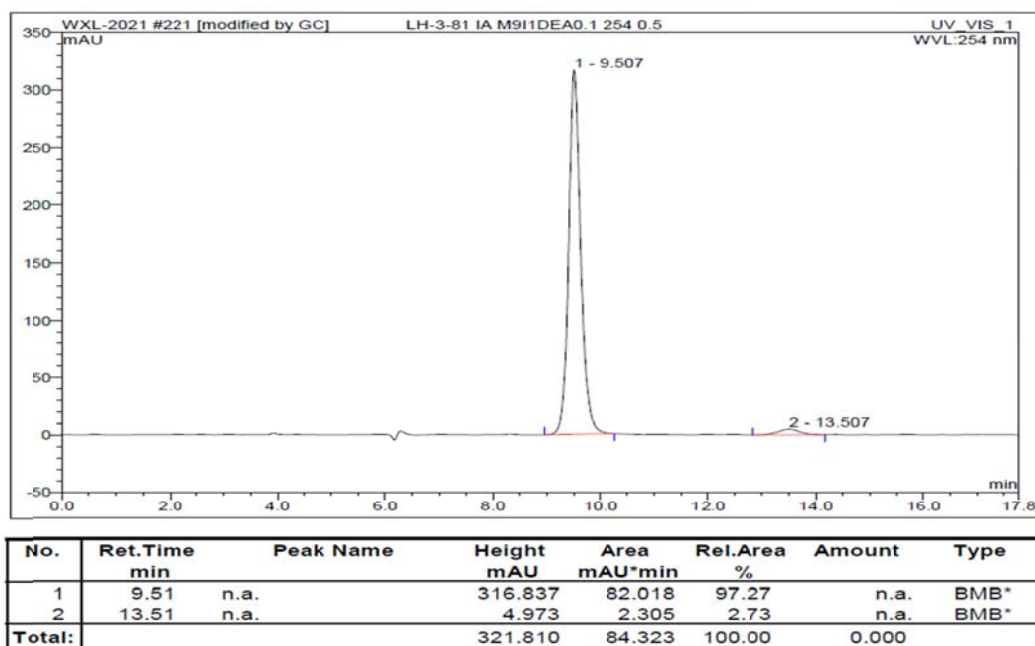

Figure S37. HPLC traces of racemic 4e (reference) and chiral 4e. Area integration = 97.27:2.73 (95% ee).

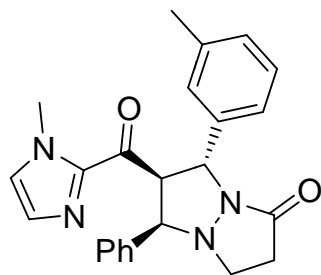

4f

Racemic 4f:

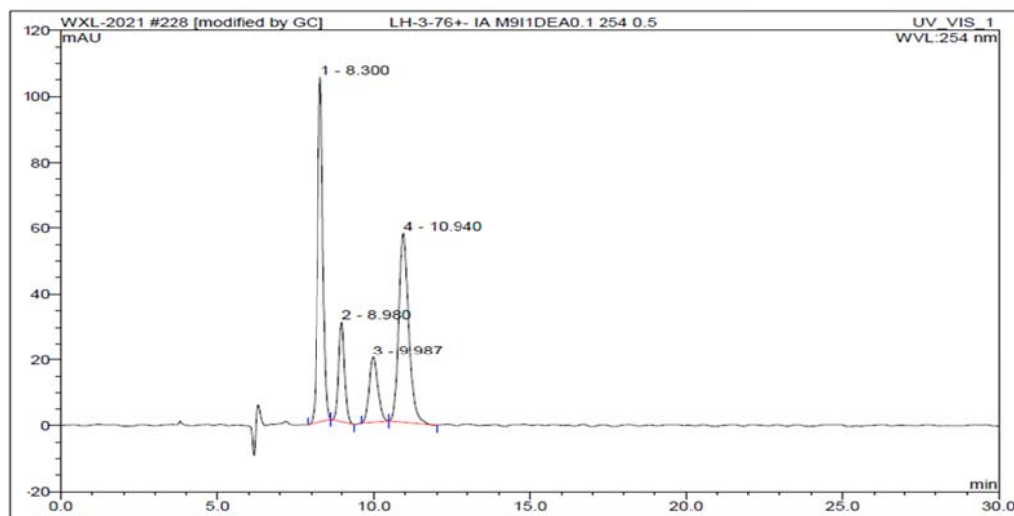

| No.           | Ret.Time min | Peak Name | Height mAU | Area mAU*min | Rel.Area % | Amount | Type |
|---------------|--------------|-----------|------------|--------------|------------|--------|------|
| 1             | 8.30         | n.a.      | 104.685    | 21.063       | 38.37      | n.a.   | BMB* |
| 2             | 8.98         | n.a.      | 30.350     | 6.559        | 11.95      | n.a.   | bMB* |
| 3             | 9.99         | n.a.      | 19.765     | 6.270        | 11.42      | n.a.   | BMB* |
| 4             | 10.94        | n.a.      | 57.398     | 20.999       | 38.26      | n.a.   | bMB* |
| <b>Total:</b> |              |           | 212.199    | 54.890       | 100.00     | 0.000  |      |

Chiral 4f:

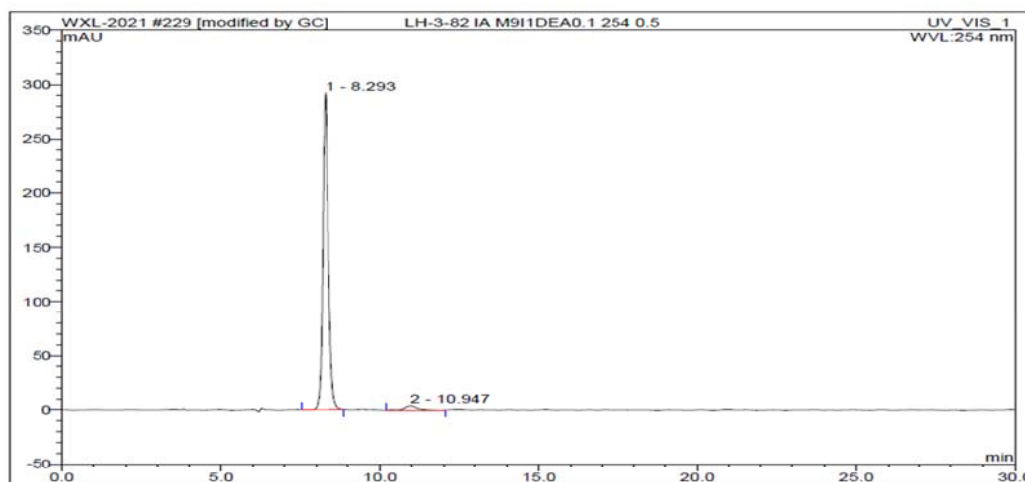

| No.           | Ret.Time min | Peak Name | Height mAU | Area mAU*min | Rel.Area % | Amount | Type |
|---------------|--------------|-----------|------------|--------------|------------|--------|------|
| 1             | 8.29         | n.a.      | 292.167    | 59.627       | 97.51      | n.a.   | BMB* |
| 2             | 10.95        | n.a.      | 3.855      | 1.524        | 2.49       | n.a.   | BMB* |
| <b>Total:</b> |              |           | 296.022    | 61.152       | 100.00     | 0.000  |      |

**Figure S38.** HPLC traces of racemic **4f** (reference) and chiral **4f**. Area integration = 97.51:2.49 (95% *ee*).

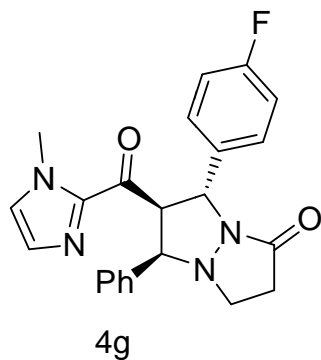

Racemic **4g**:

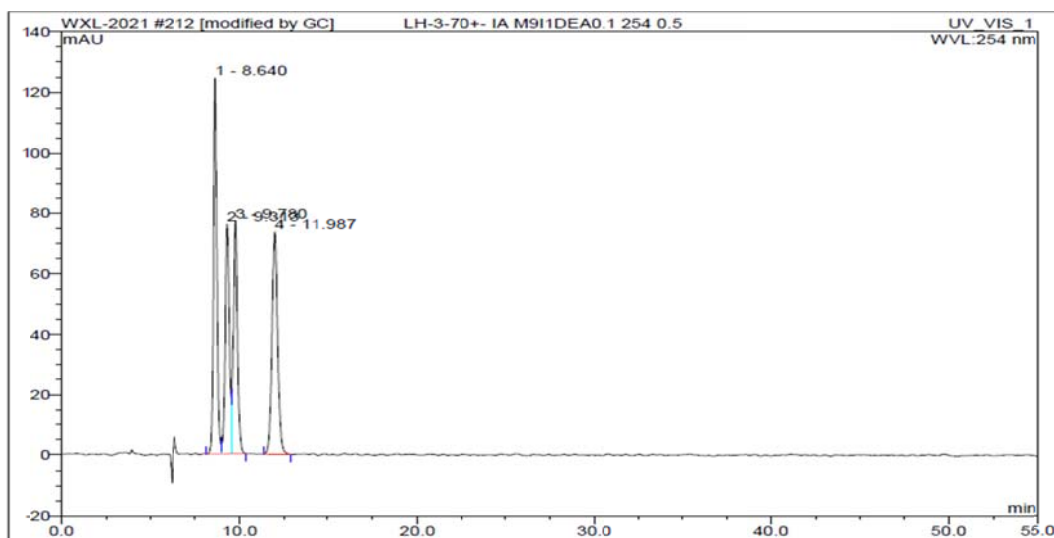

| No.           | Ret.Time<br>min | Peak Name | Height<br>mAU | Area<br>mAU*min | Rel.Area<br>% | Amount | Type |
|---------------|-----------------|-----------|---------------|-----------------|---------------|--------|------|
| 1             | 8.64            | n.a.      | 124.265       | 26.989          | 28.34         | n.a.   | BM * |
| 2             | 9.31            | n.a.      | 75.938        | 20.318          | 21.34         | n.a.   | M *  |
| 3             | 9.78            | n.a.      | 77.050        | 20.760          | 21.80         | n.a.   | MB*  |
| 4             | 11.99           | n.a.      | 73.626        | 27.153          | 28.52         | n.a.   | BMB  |
| <b>Total:</b> |                 |           | 350.880       | 95.220          | 100.00        | 0.000  |      |

Chiral **4g**:

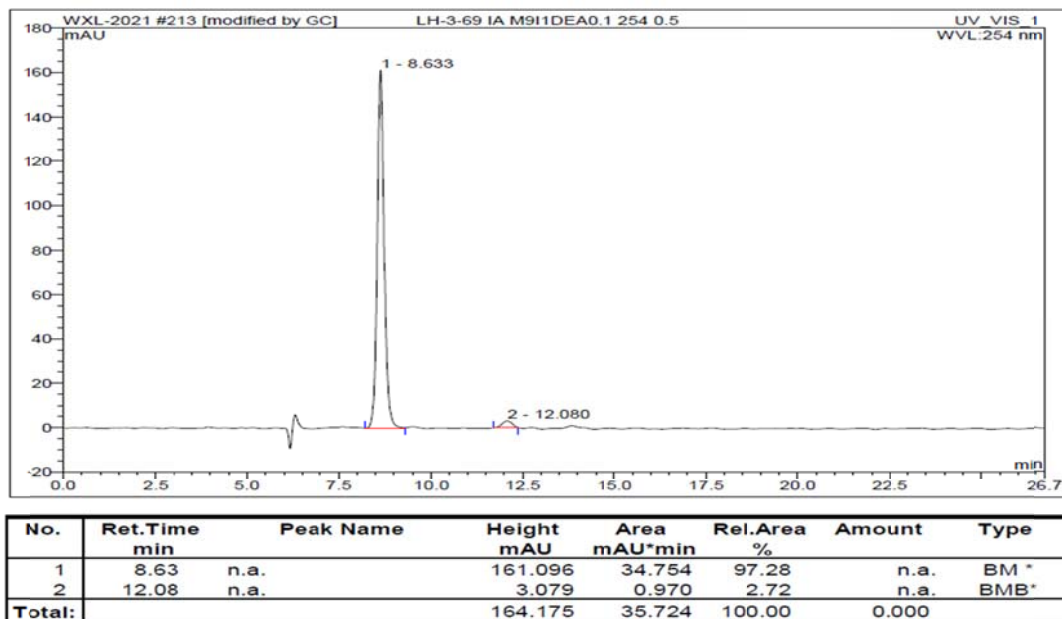

**Figure S39.** HPLC traces of racemic **4g** (reference) and chiral **4g**. Area integration = 97.28:2.72 (95% *ee*).

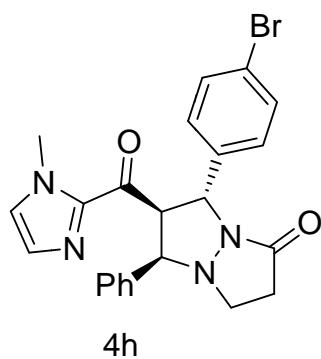

Racemic **4h**:

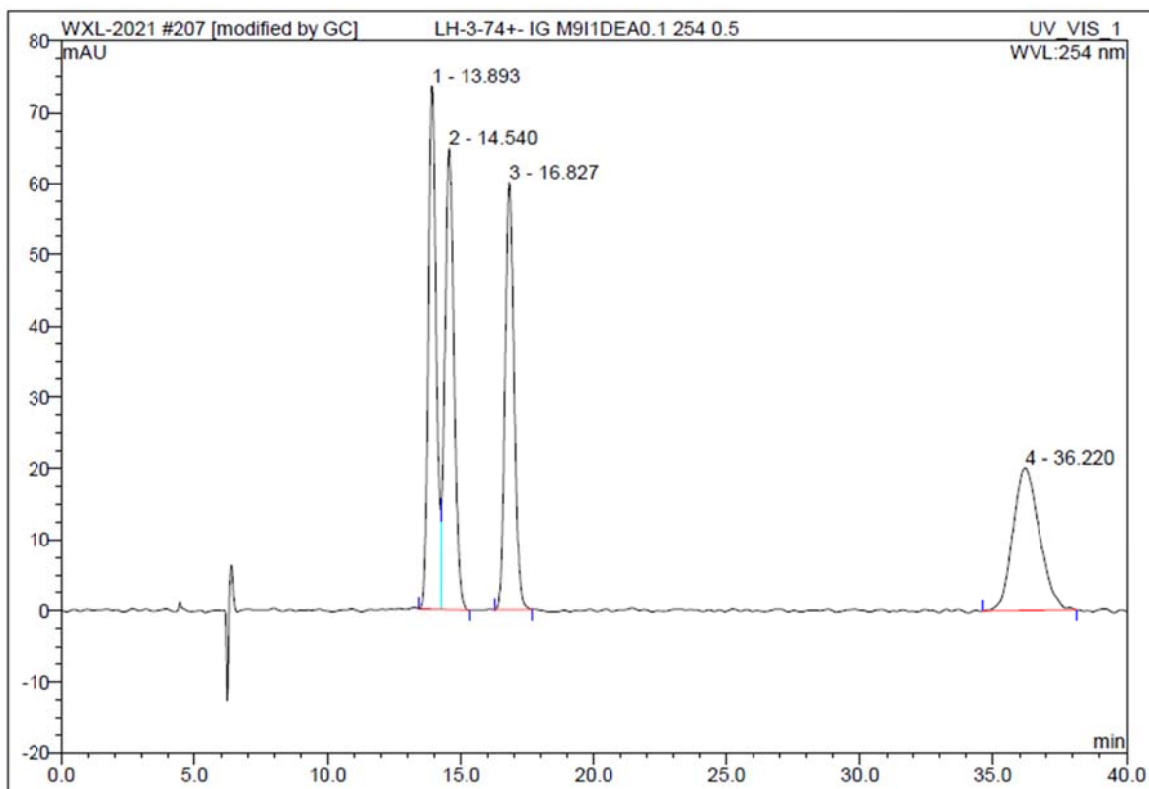

| No.           | Ret.Time<br>min | Peak Name | Height<br>mAU | Area<br>mAU*min | Rel.Area<br>% | Amount | Type |
|---------------|-----------------|-----------|---------------|-----------------|---------------|--------|------|
| 1             | 13.89           | n.a.      | 73.430        | 25.035          | 25.53         | n.a.   | BM * |
| 2             | 14.54           | n.a.      | 64.885        | 25.912          | 26.42         | n.a.   | MB*  |
| 3             | 16.83           | n.a.      | 60.067        | 23.587          | 24.05         | n.a.   | BMB* |
| 4             | 36.22           | n.a.      | 20.086        | 23.541          | 24.00         | n.a.   | BMB* |
| <b>Total:</b> |                 |           | 218.468       | 98.075          | 100.00        | 0.000  |      |

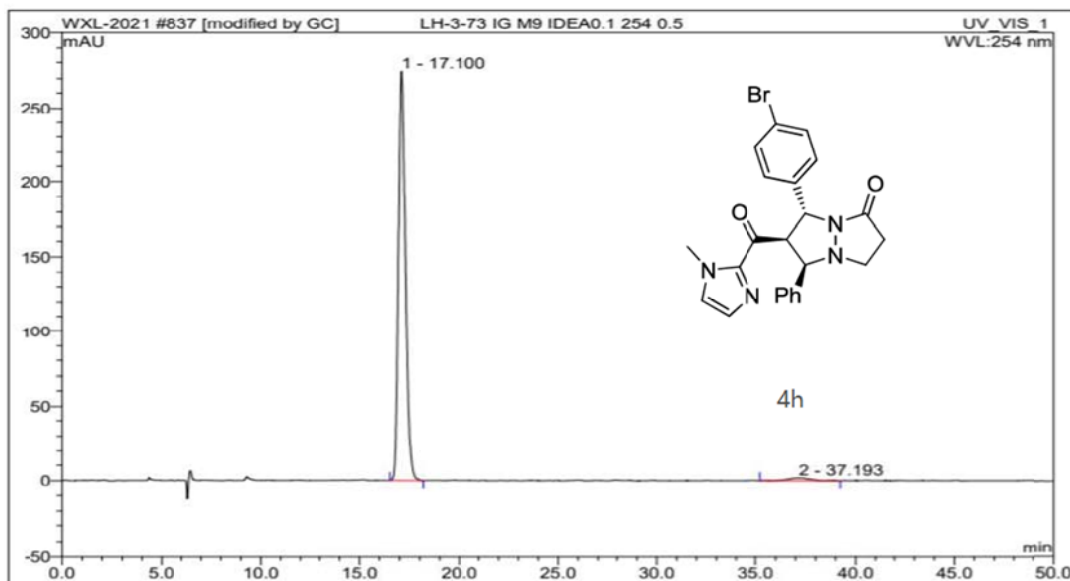

| No.           | Ret.Time min | Peak Name | Height mAU | Area mAU*min | Rel.Area % | Amount | Type |
|---------------|--------------|-----------|------------|--------------|------------|--------|------|
| 1             | 17.10        | n.a.      | 274.136    | 111.703      | 97.93      | n.a.   | BMB  |
| 2             | 37.19        | n.a.      | 1.756      | 2.356        | 2.07       | n.a.   | BMB* |
| <b>Total:</b> |              |           | 275.892    | 114.059      | 100.00     | 0.000  |      |

**Figure S40.** HPLC traces of racemic **4h** (reference) and chiral **4h**. Area integration = 99.5:0.5 (99% *ee*).

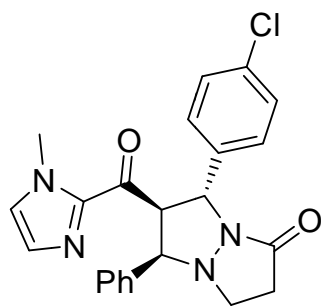

**4i**

Racemic **4i**:

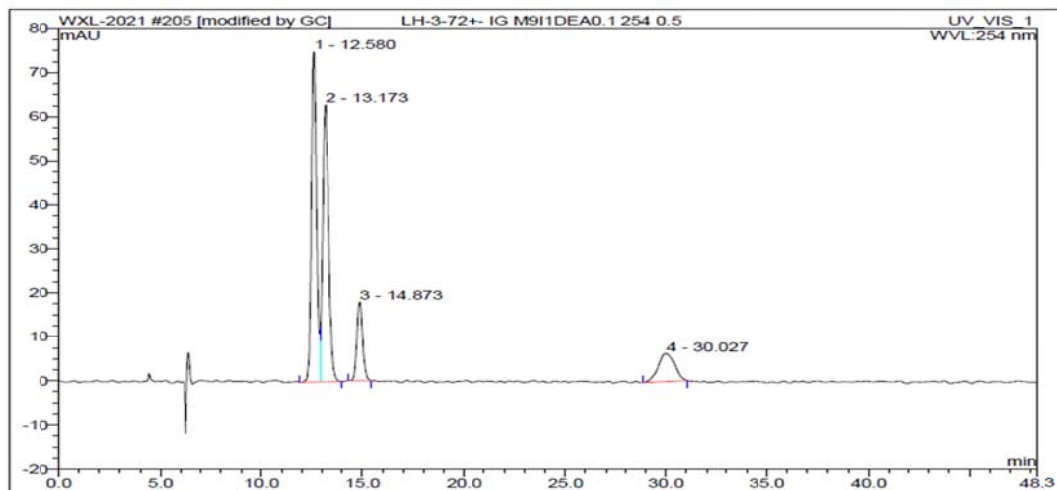

| No.           | Ret.Time min | Peak Name | Height mAU | Area mAU*min | Rel.Area % | Amount | Type |
|---------------|--------------|-----------|------------|--------------|------------|--------|------|
| 1             | 12.58        | n.a.      | 75.041     | 22.022       | 38.95      | n.a.   | BM*  |
| 2             | 13.17        | n.a.      | 63.019     | 22.501       | 39.80      | n.a.   | MB*  |
| 3             | 14.87        | n.a.      | 18.002     | 6.005        | 10.62      | n.a.   | BMB* |
| 4             | 30.03        | n.a.      | 6.404      | 6.012        | 10.63      | n.a.   | BMB  |
| <b>Total:</b> |              |           | 162.465    | 56.540       | 100.00     | 0.000  |      |

Chiral **4i**:

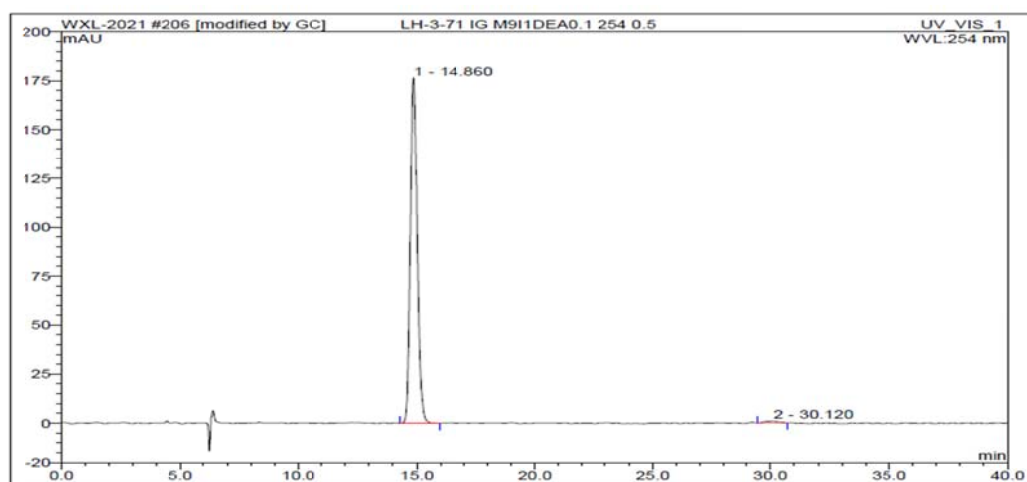

| No.           | Ret.Time min | Peak Name | Height mAU | Area mAU*min | Rel.Area % | Amount | Type |
|---------------|--------------|-----------|------------|--------------|------------|--------|------|
| 1             | 14.86        | n.a.      | 176.507    | 59.685       | 98.96      | n.a.   | BMB* |
| 2             | 30.12        | n.a.      | 0.921      | 0.625        | 1.04       | n.a.   | BMB* |
| <b>Total:</b> |              |           | 177.428    | 60.311       | 100.00     | 0.000  |      |

Figure S41. HPLC traces of racemic **4i** (reference) and chiral **4i**. Area integration = 98.96:1.04 (98% *ee*).



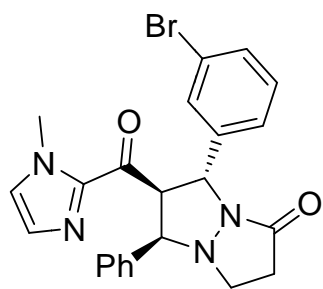

4j

Racemic 4j:

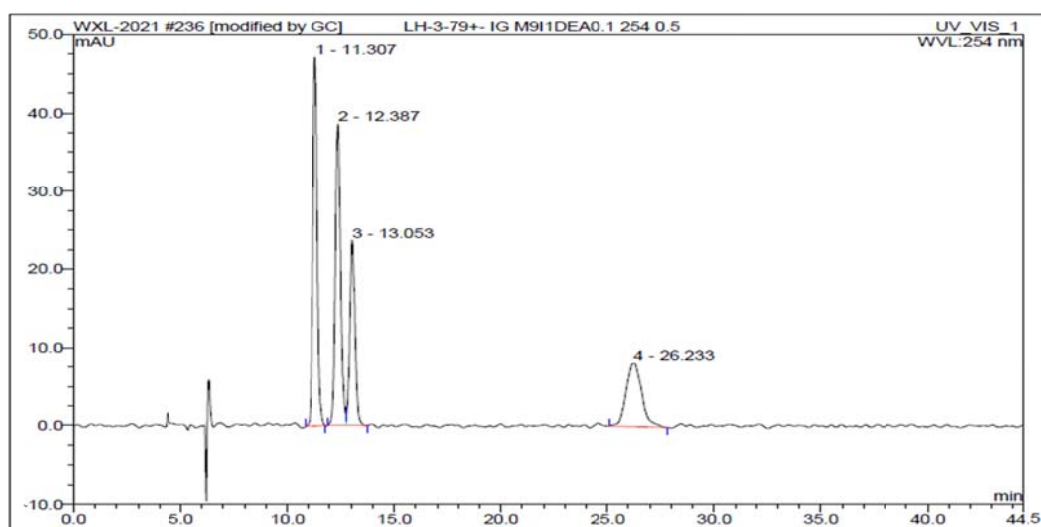

| No.           | Ret.Time min | Peak Name | Height mAU | Area mAU*min | Rel.Area % | Amount | Type |
|---------------|--------------|-----------|------------|--------------|------------|--------|------|
| 1             | 11.31        | n.a.      | 47.190     | 11.249       | 31.35      | n.a.   | BMB* |
| 2             | 12.39        | n.a.      | 38.621     | 11.076       | 30.86      | n.a.   | BM * |
| 3             | 13.05        | n.a.      | 23.653     | 6.646        | 18.52      | n.a.   | MB*  |
| 4             | 26.23        | n.a.      | 8.223      | 6.915        | 19.27      | n.a.   | BMB* |
| <b>Total:</b> |              |           | 117.687    | 35.887       | 100.00     | 0.000  |      |

Chiral 4j:

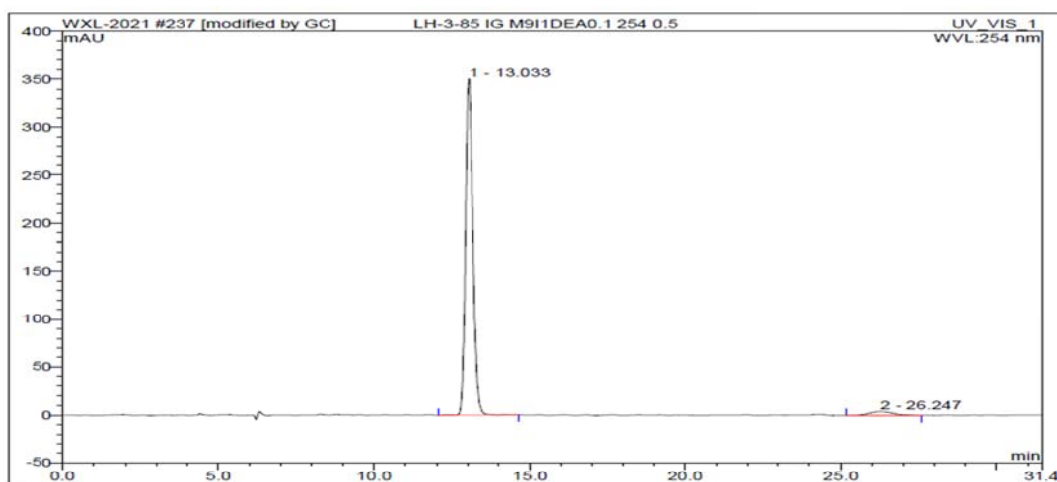

| No.           | Ret.Time min | Peak Name | Height mAU | Area mAU*min | Rel.Area % | Amount | Type |
|---------------|--------------|-----------|------------|--------------|------------|--------|------|
| 1             | 13.03        | n.a.      | 350.226    | 98.768       | 96.78      | n.a.   | BMB* |
| 2             | 26.25        | n.a.      | 3.961      | 3.284        | 3.22       | n.a.   | BMB* |
| <b>Total:</b> |              |           | 354.187    | 102.052      | 100.00     | 0.000  |      |

**Figure S42.** HPLC traces of racemic **4j** (reference) and chiral **4j**. Area integration = 96.78:3.22 (94% *ee*).

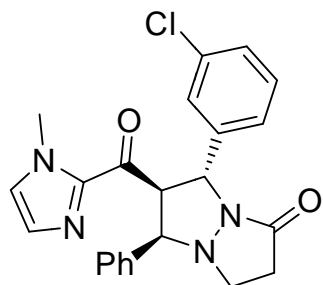

**4k**

Racemic **4k**:

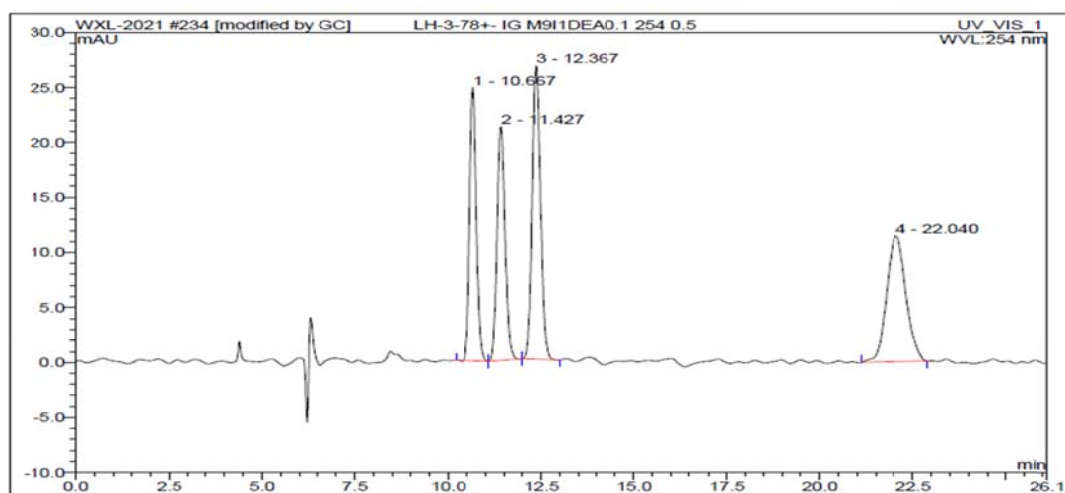

| No.           | Ret.Time min | Peak Name | Height mAU | Area mAU*min | Rel.Area % | Amount | Type |
|---------------|--------------|-----------|------------|--------------|------------|--------|------|
| 1             | 10.67        | n.a.      | 24.854     | 5.265        | 21.54      | n.a.   | BMb* |
| 2             | 11.43        | n.a.      | 21.274     | 5.300        | 21.69      | n.a.   | bMb* |
| 3             | 12.37        | n.a.      | 26.695     | 6.901        | 28.24      | n.a.   | bMB* |
| 4             | 22.04        | n.a.      | 11.427     | 6.970        | 28.52      | n.a.   | BMB* |
| <b>Total:</b> |              |           | 84.250     | 24.436       | 100.00     | 0.000  |      |

Chiral **4k**

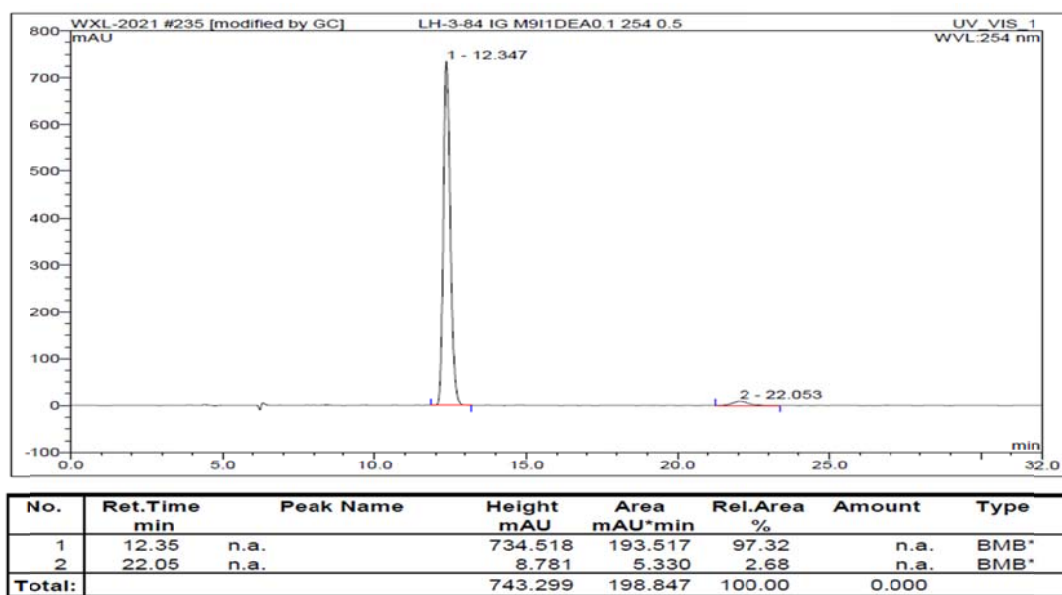

**Figure S43.** HPLC traces of racemic **4k** (reference) and chiral **4k** Area integration = 97.32:2.68 (95% *ee*).

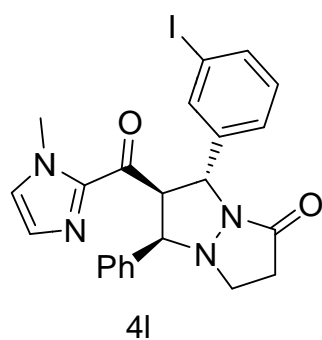

Racemic **4l**:

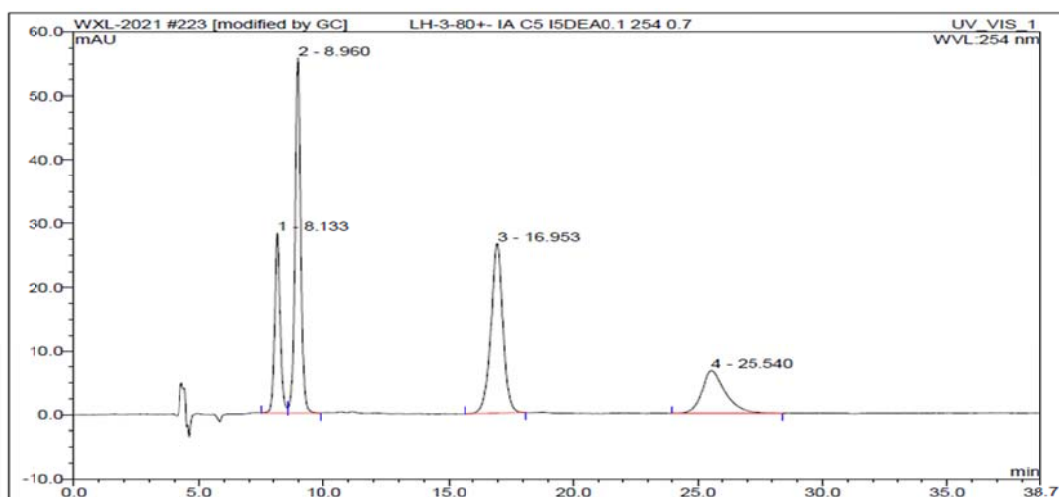

| No.           | Ret.Time min | Peak Name | Height mAU | Area mAU*min | Rel.Area % | Amount | Type |
|---------------|--------------|-----------|------------|--------------|------------|--------|------|
| 1             | 8.13         | n.a.      | 28.193     | 7.237        | 16.41      | n.a.   | BM*  |
| 2             | 8.96         | n.a.      | 55.708     | 14.801       | 33.55      | n.a.   | MB*  |
| 3             | 16.95        | n.a.      | 26.599     | 14.792       | 33.53      | n.a.   | BMB* |
| 4             | 25.54        | n.a.      | 6.751      | 7.283        | 16.51      | n.a.   | BMB* |
| <b>Total:</b> |              |           | 117.250    | 44.112       | 100.00     | 0.000  |      |

Chiral **4I**:

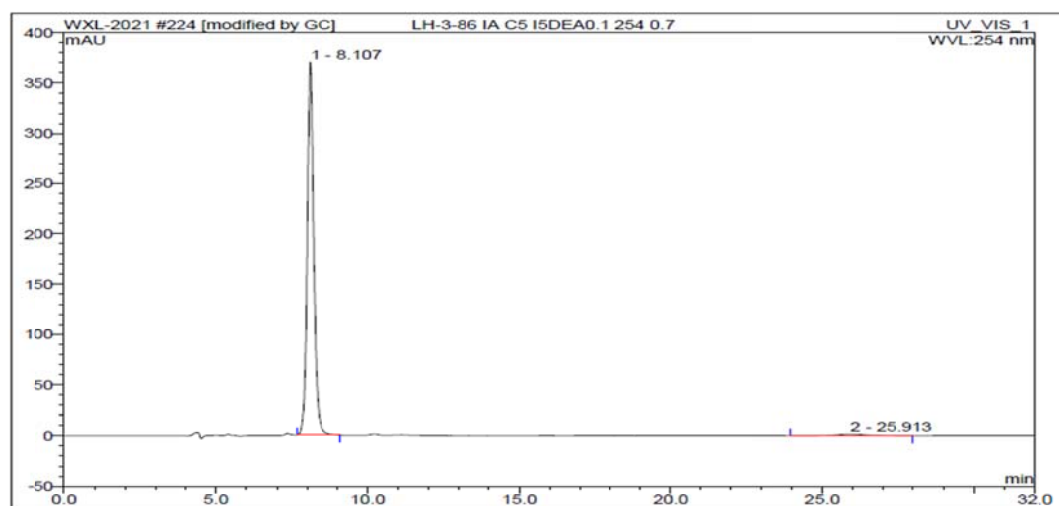

| No.           | Ret.Time min | Peak Name | Height mAU | Area mAU*min | Rel.Area % | Amount | Type |
|---------------|--------------|-----------|------------|--------------|------------|--------|------|
| 1             | 8.11         | n.a.      | 369.783    | 92.373       | 98.11      | n.a.   | BMB* |
| 2             | 25.91        | n.a.      | 1.547      | 1.780        | 1.89       | n.a.   | BMB* |
| <b>Total:</b> |              |           | 371.330    | 94.153       | 100.00     | 0.000  |      |

**Figure S44.** HPLC traces of racemic **4I** (reference) and chiral **4I**. Area integration = 98.11:1.89(96% *ee*).

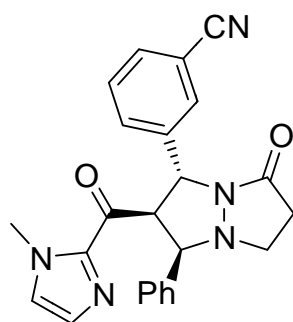

4m

Racemic **4m**:

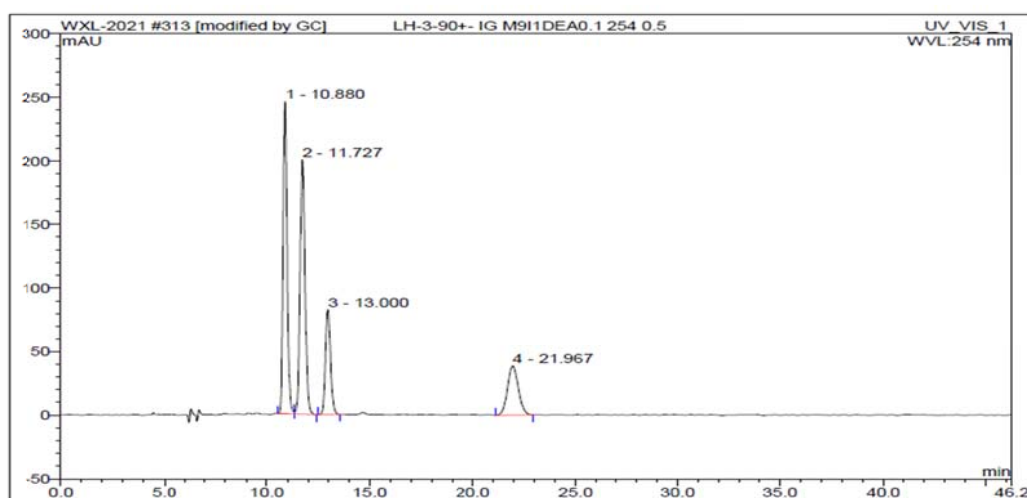

| No.           | Ret.Time min | Peak Name | Height mAU     | Area mAU*min   | Rel.Area %    | Amount       | Type |
|---------------|--------------|-----------|----------------|----------------|---------------|--------------|------|
| 1             | 10.88        | n.a.      | 245.873        | 55.769         | 35.14         | n.a.         | BM * |
| 2             | 11.73        | n.a.      | 200.368        | 56.045         | 35.32         | n.a.         | MB*  |
| 3             | 13.00        | n.a.      | 82.903         | 23.452         | 14.78         | n.a.         | BMB* |
| 4             | 21.97        | n.a.      | 38.655         | 23.432         | 14.77         | n.a.         | BMB* |
| <b>Total:</b> |              |           | <b>567.800</b> | <b>158.697</b> | <b>100.00</b> | <b>0.000</b> |      |

Racemic **4m**:

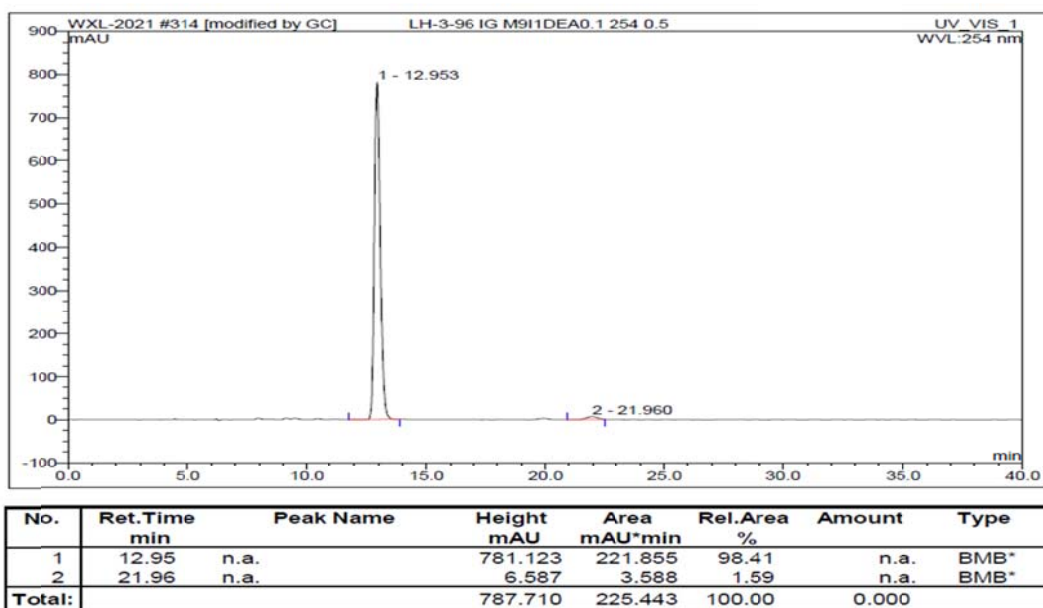

**Figure S45.** HPLC traces of racemic **4m** (reference) and chiral **4m**. Area integration = 98.41:1.59 (97% *ee*).

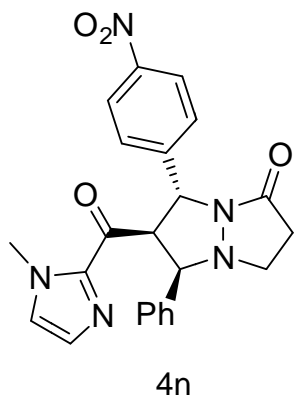

Racemic **4n**:

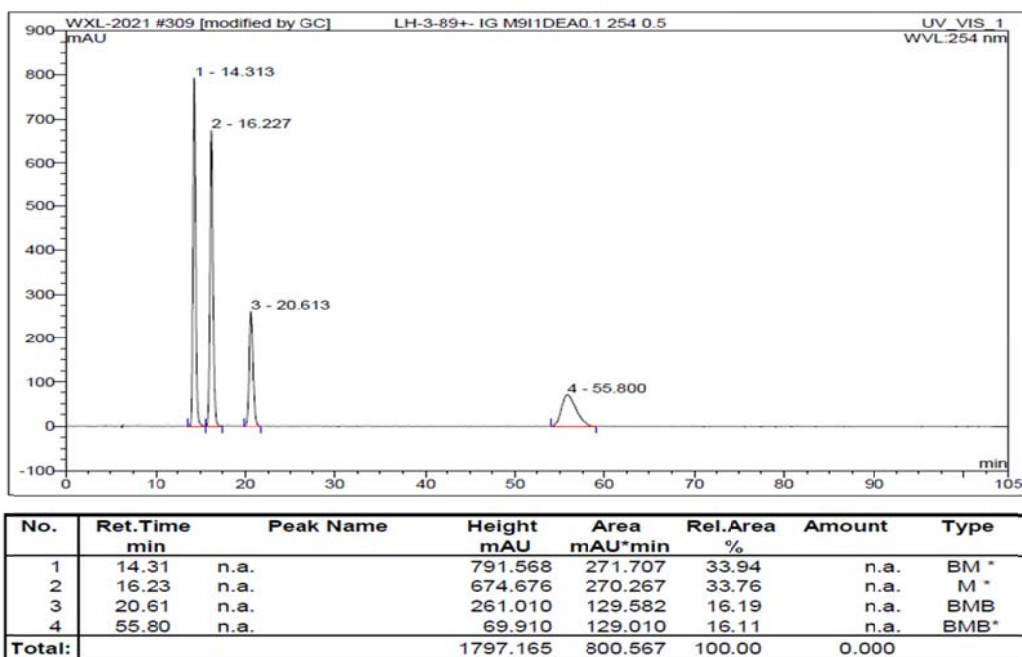

Chiral **4n**:

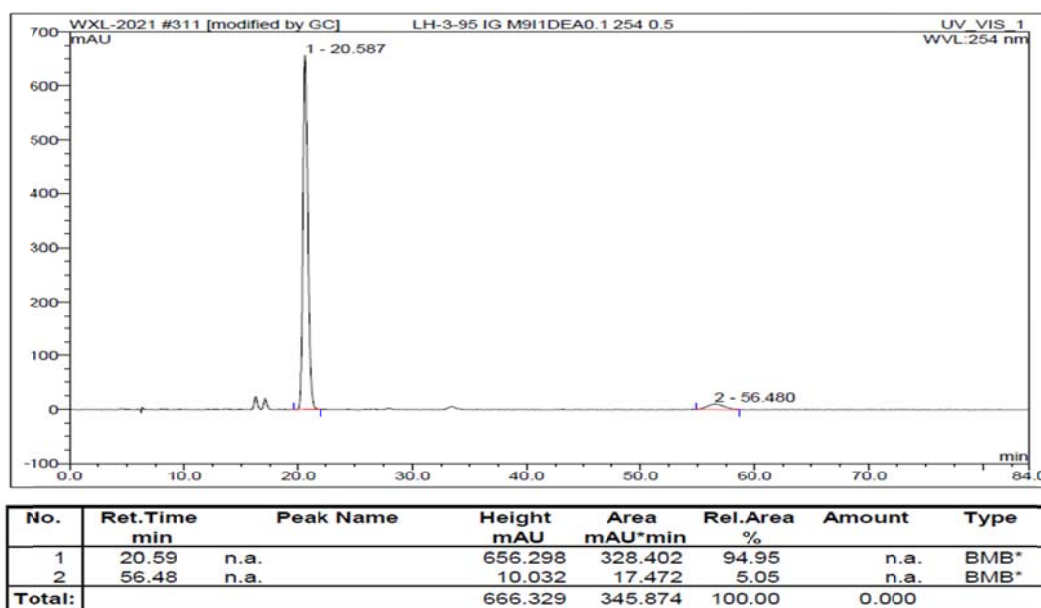

**Figure S46.** HPLC traces of racemic **4n** (reference) and chiral **4n**. Area integration = 94.95:5.05 (90% *ee*).

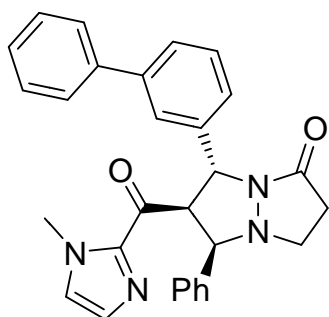

40

Racemic 40:

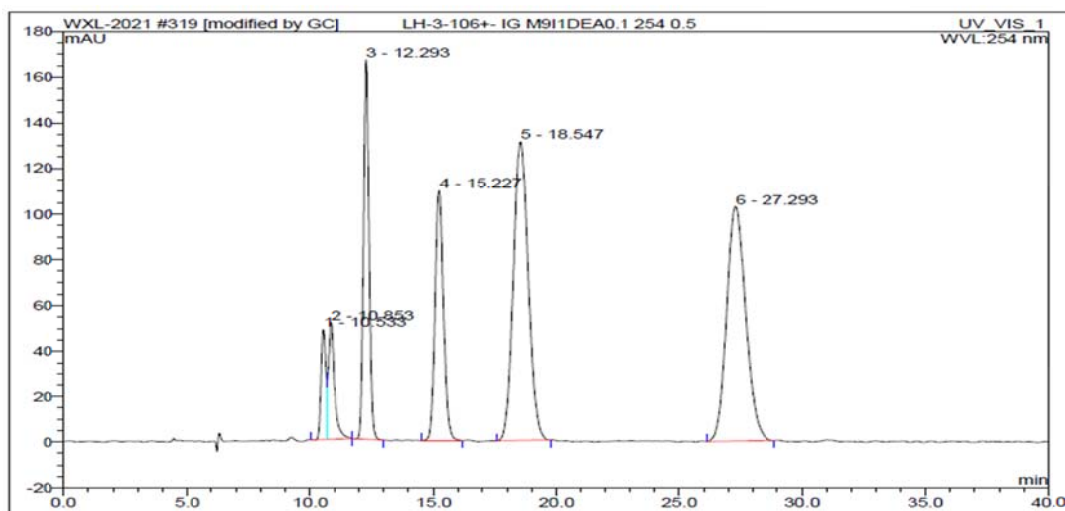

| No.           | Ret.Time<br>min | Peak Name | Height<br>mAU | Area<br>mAU*min | Rel.Area<br>% | Amount | Type |
|---------------|-----------------|-----------|---------------|-----------------|---------------|--------|------|
| 1             | 10.53           | n.a.      | 48.470        | 11.140          | 3.74          | n.a.   | BM * |
| 2             | 10.85           | n.a.      | 51.486        | 15.011          | 5.04          | n.a.   | Mb*  |
| 3             | 12.29           | n.a.      | 166.422       | 43.324          | 14.53         | n.a.   | bMB* |
| 4             | 15.23           | n.a.      | 109.690       | 43.291          | 14.52         | n.a.   | BMB* |
| 5             | 18.55           | n.a.      | 131.307       | 92.420          | 31.00         | n.a.   | BMB* |
| 6             | 27.29           | n.a.      | 102.925       | 92.901          | 31.17         | n.a.   | BMB* |
| <b>Total:</b> |                 |           | 610.301       | 298.087         | 100.00        | 0.000  |      |

Chiral 40:



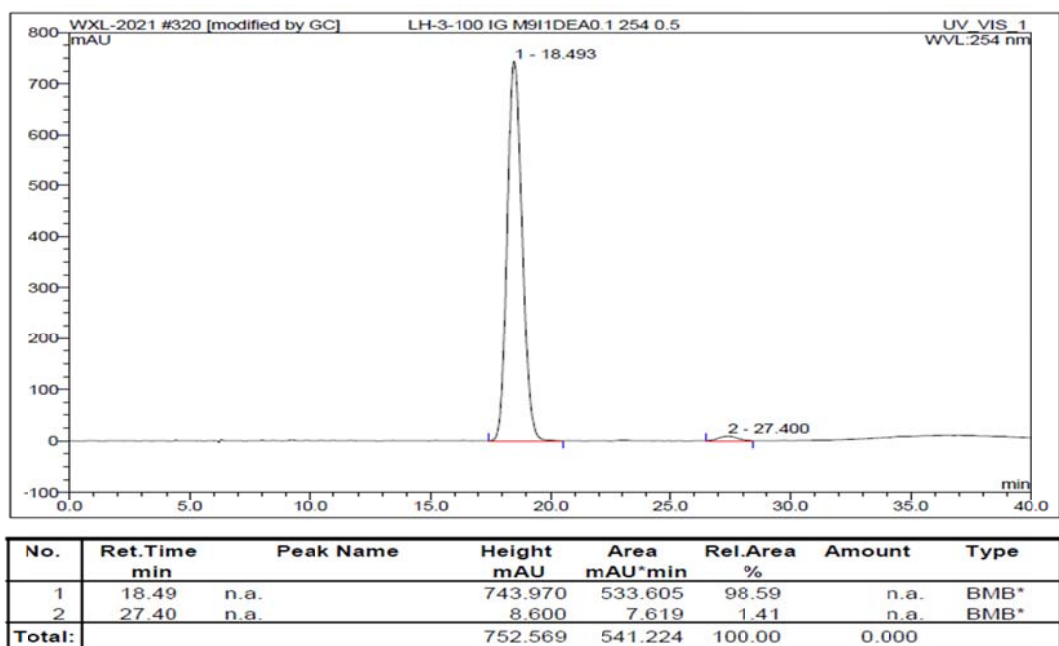

**Figure S47.** HPLC traces of racemic **4o** (reference) and chiral **4o**. Area integration = 98.59:1.41 (97% *ee*).

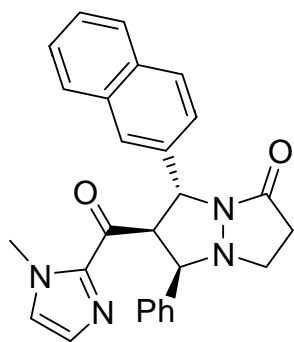

**4p**

Racemic **4p**:

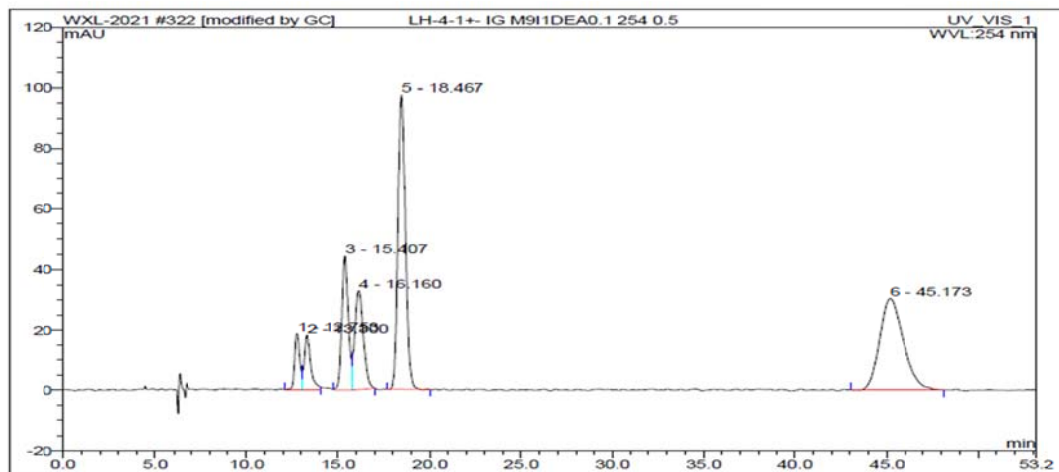

| No.           | Ret.Time min | Peak Name | Height mAU | Area mAU*min | Rel.Area % | Amount | Type |
|---------------|--------------|-----------|------------|--------------|------------|--------|------|
| 1             | 12.75        | n.a.      | 18.739     | 5.903        | 4.18       | n.a.   | BM * |
| 2             | 13.30        | n.a.      | 18.316     | 7.535        | 5.33       | n.a.   | M *  |
| 3             | 15.41        | n.a.      | 44.396     | 18.125       | 12.82      | n.a.   | M *  |
| 4             | 16.16        | n.a.      | 32.894     | 17.984       | 12.72      | n.a.   | MB*  |
| 5             | 18.47        | n.a.      | 97.587     | 46.086       | 32.60      | n.a.   | BMB* |
| 6             | 45.17        | n.a.      | 30.460     | 45.715       | 32.34      | n.a.   | BMB* |
| <b>Total:</b> |              |           | 242.393    | 141.348      | 100.00     | 0.000  |      |

Chiral 4p:

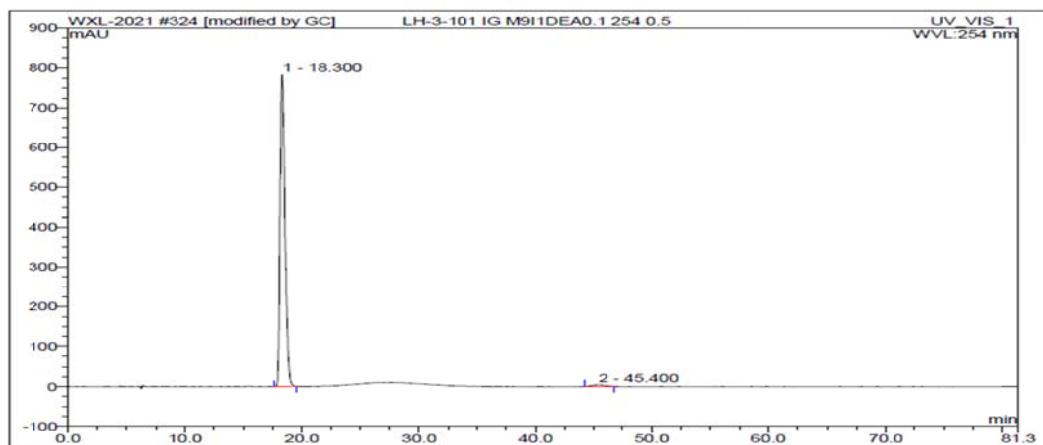

| No.           | Ret.Time min | Peak Name | Height mAU | Area mAU*min | Rel.Area % | Amount | Type |
|---------------|--------------|-----------|------------|--------------|------------|--------|------|
| 1             | 18.30        | n.a.      | 783.768    | 378.567      | 98.50      | n.a.   | BMB  |
| 2             | 45.40        | n.a.      | 4.291      | 5.756        | 1.50       | n.a.   | BMB* |
| <b>Total:</b> |              |           | 788.059    | 384.324      | 100.00     | 0.000  |      |

Figure S48. HPLC traces of racemic 4p (reference) and chiral 4p. Area integration = 98.50:1.50 (97% ee).

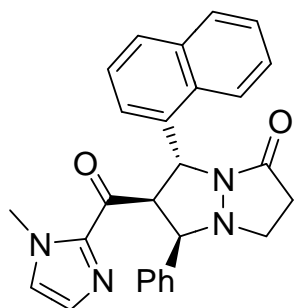

4q

Racemic 4q:

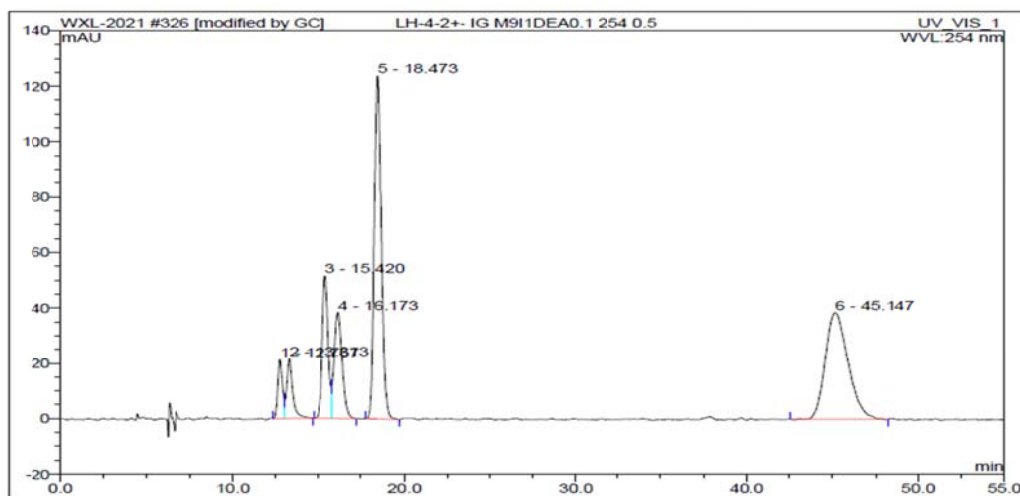

| No.           | Ret. Time<br>min | Peak Name | Height<br>mAU | Area<br>mAU*min | Rel. Area<br>% | Amount | Type |
|---------------|------------------|-----------|---------------|-----------------|----------------|--------|------|
| 1             | 12.77            | n.a.      | 21.344        | 6.775           | 3.88           | n.a.   | BM * |
| 2             | 13.31            | n.a.      | 21.500        | 8.607           | 4.93           | n.a.   | MB   |
| 3             | 15.42            | n.a.      | 51.433        | 20.729          | 11.88          | n.a.   | BM   |
| 4             | 16.17            | n.a.      | 38.384        | 20.924          | 11.99          | n.a.   | MB   |
| 5             | 18.47            | n.a.      | 123.827       | 58.597          | 33.59          | n.a.   | BMB* |
| 6             | 45.15            | n.a.      | 38.679        | 58.819          | 33.72          | n.a.   | BMB* |
| <b>Total:</b> |                  |           | 295.167       | 174.450         | 100.00         | 0.000  |      |

Chiral 4q:

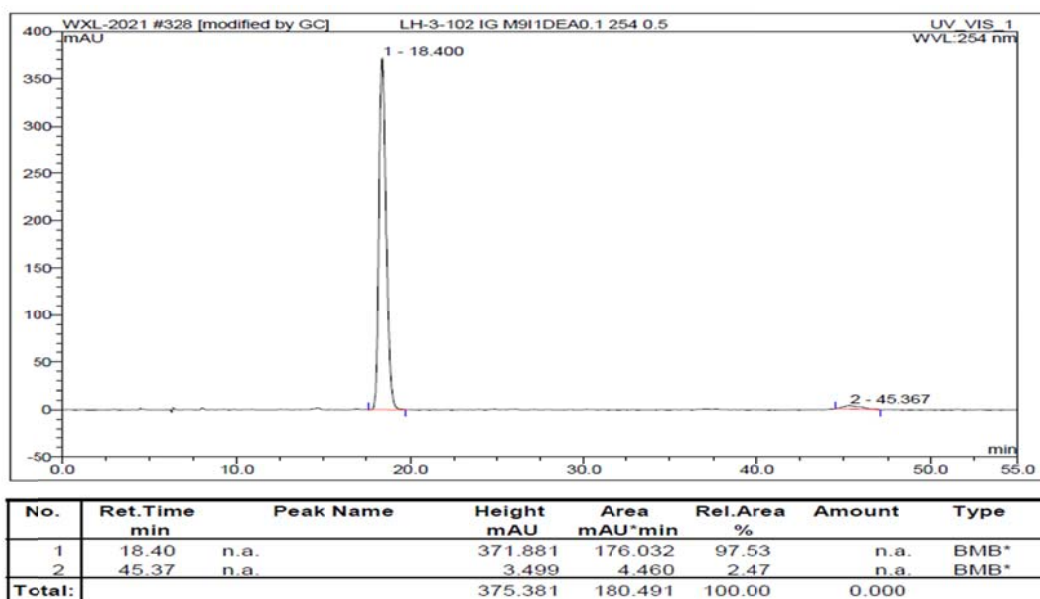

**Figure S49.** HPLC traces of racemic **4q** (reference) and chiral **4q**. Area integration = 97.53:2.47 (95% *ee*).

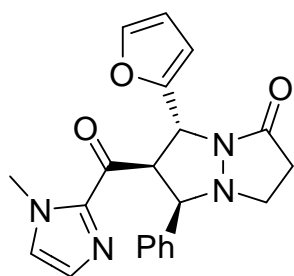

**4r**

Racemic **4r**:

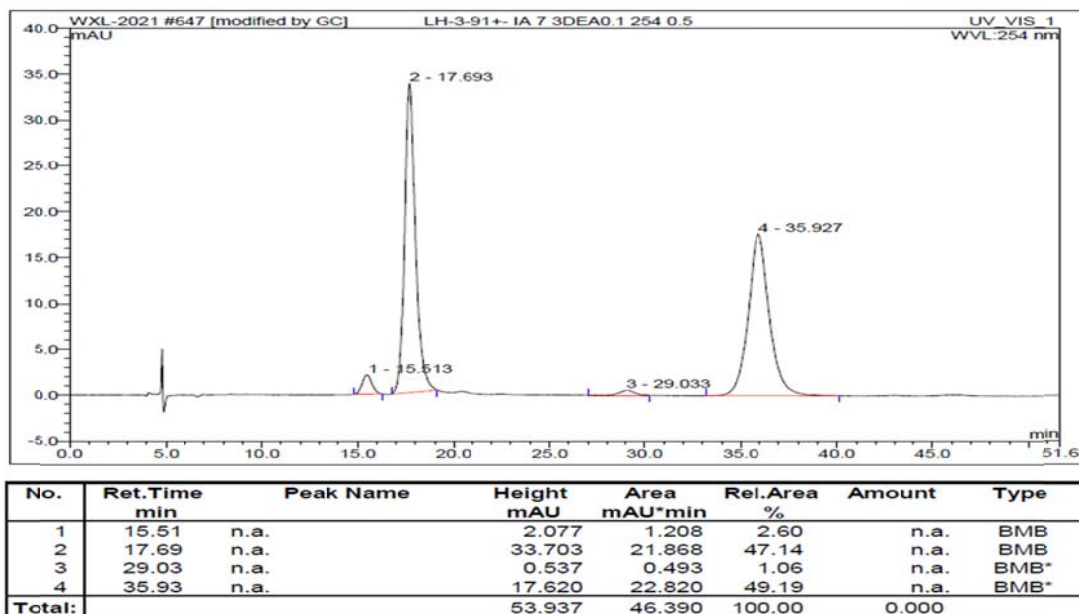

Chiral 4r:

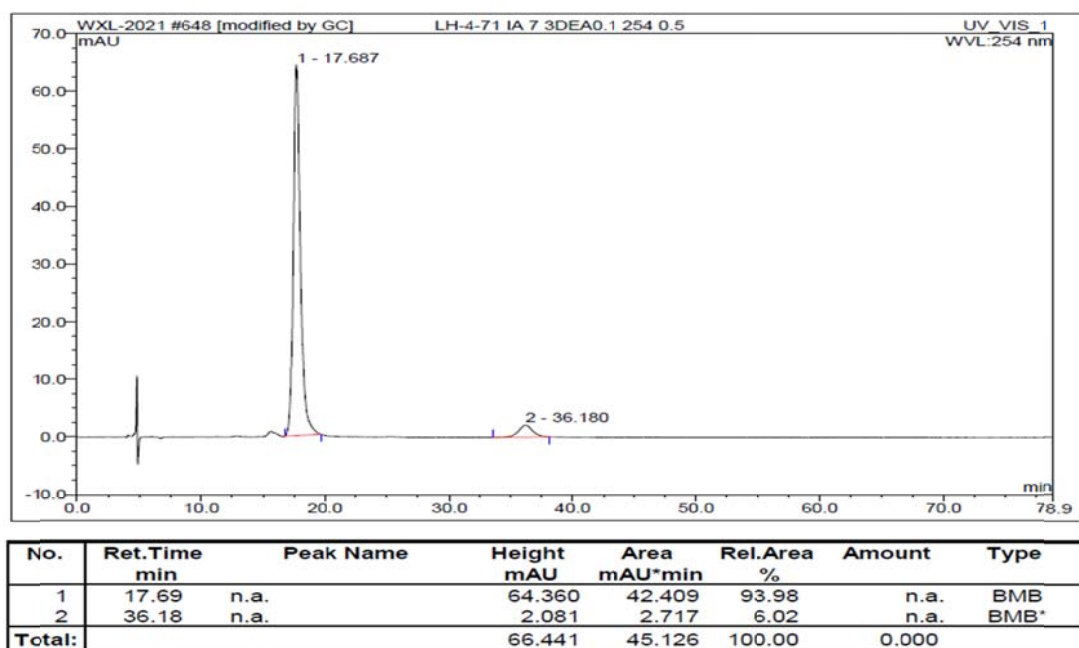

**Figure S50.** HPLC traces of racemic **4r** (reference) and chiral **4r**. Area integration =93.98:6.02 (88% *ee*).

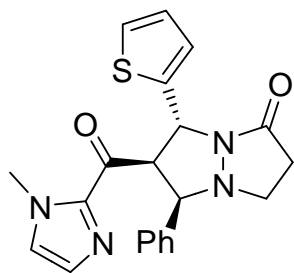

4s

Racemic 4s:

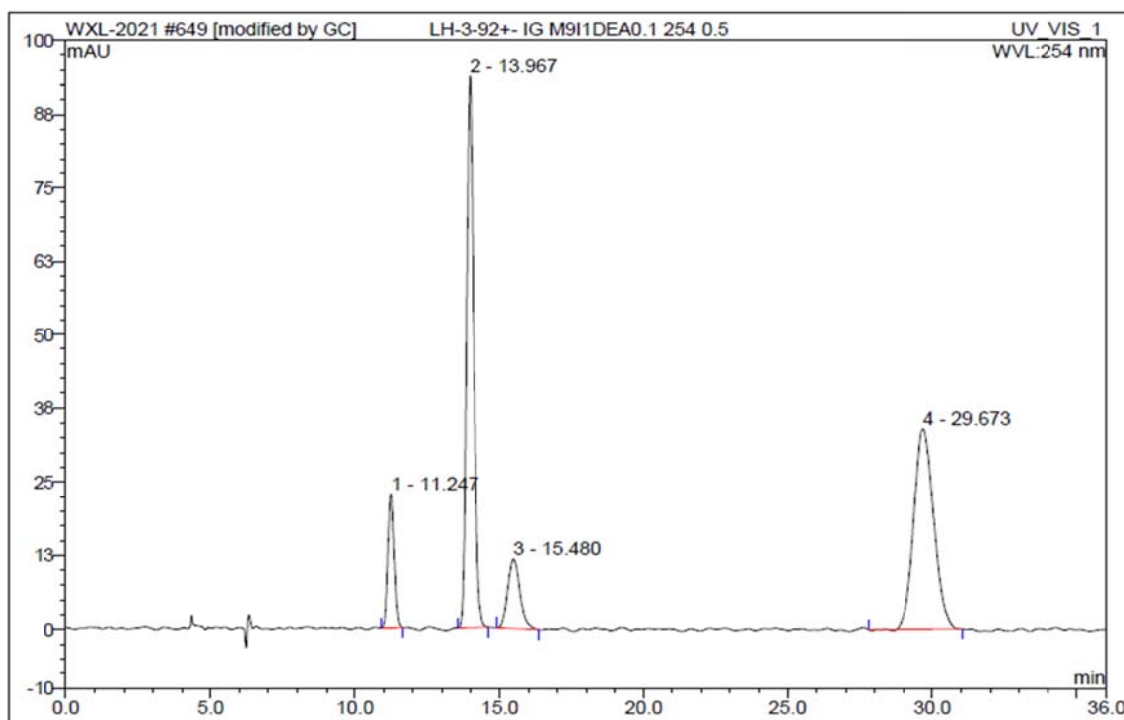

| No.           | Ret.Time min | Peak Name | Height mAU | Area mAU*min | Rel.Area % | Amount | Type |
|---------------|--------------|-----------|------------|--------------|------------|--------|------|
| 1             | 11.25        | n.a.      | 22.692     | 5.599        | 8.51       | n.a.   | BMB  |
| 2             | 13.97        | n.a.      | 93.689     | 27.140       | 41.26      | n.a.   | BMB  |
| 3             | 15.48        | n.a.      | 11.678     | 5.755        | 8.75       | n.a.   | BMB  |
| 4             | 29.67        | n.a.      | 34.000     | 27.284       | 41.48      | n.a.   | BMB* |
| <b>Total:</b> |              |           | 162.059    | 65.777       | 100.00     | 0.000  |      |

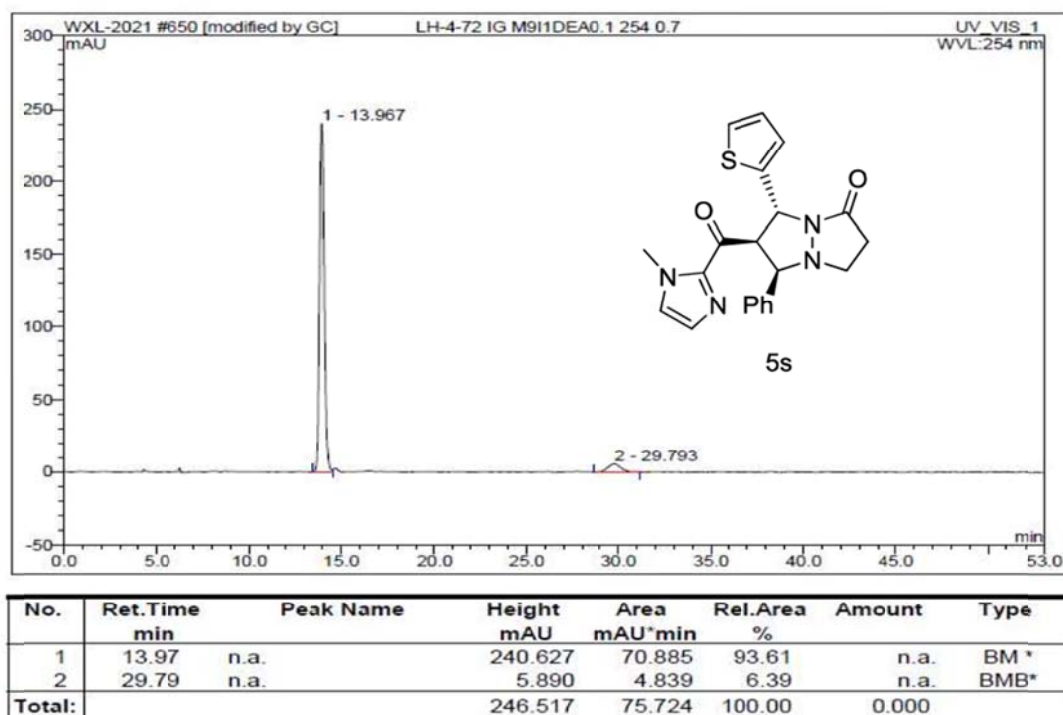

**Figure S51.** HPLC traces of racemic **4s** (reference) and chiral **4s**. Area integration = 99.5:0.5 (99% *ee*).

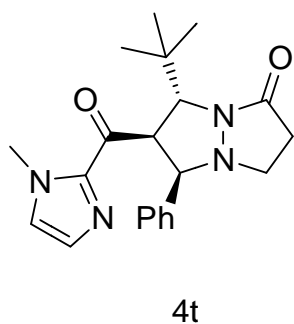

Racemic **4t**

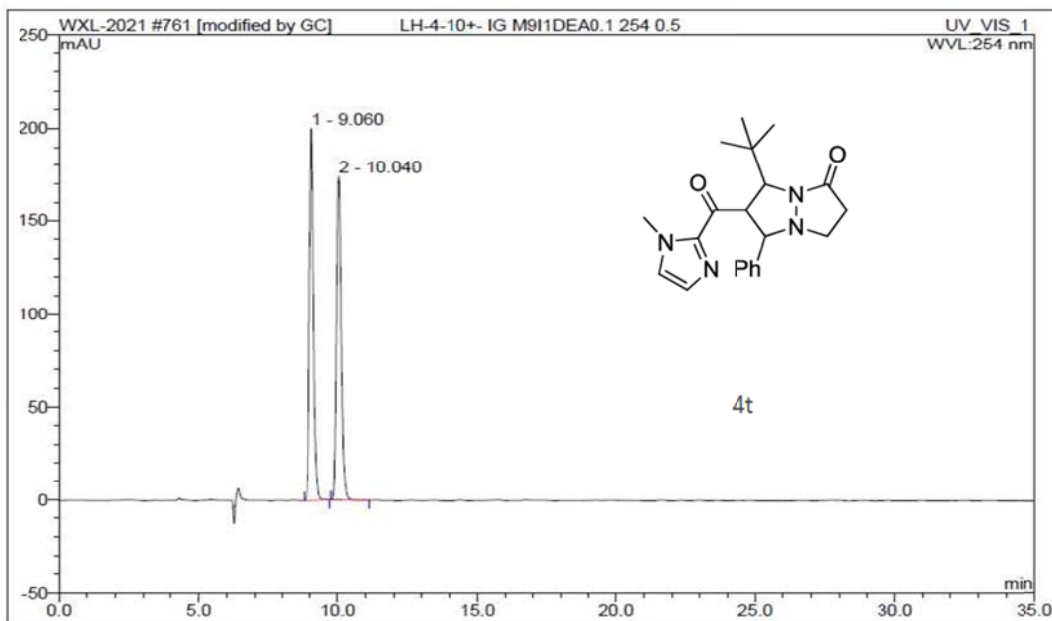

| No.           | Ret.Time min | Peak Name | Height mAU | Area mAU*min | Rel.Area % | Amount | Type |
|---------------|--------------|-----------|------------|--------------|------------|--------|------|
| 1             | 9.06         | n.a.      | 200.405    | 34.176       | 50.04      | n.a.   | BMB* |
| 2             | 10.04        | n.a.      | 174.068    | 34.115       | 49.96      | n.a.   | BMB* |
| <b>Total:</b> |              |           | 374.474    | 68.291       | 100.00     | 0.000  |      |

Chiral 4t

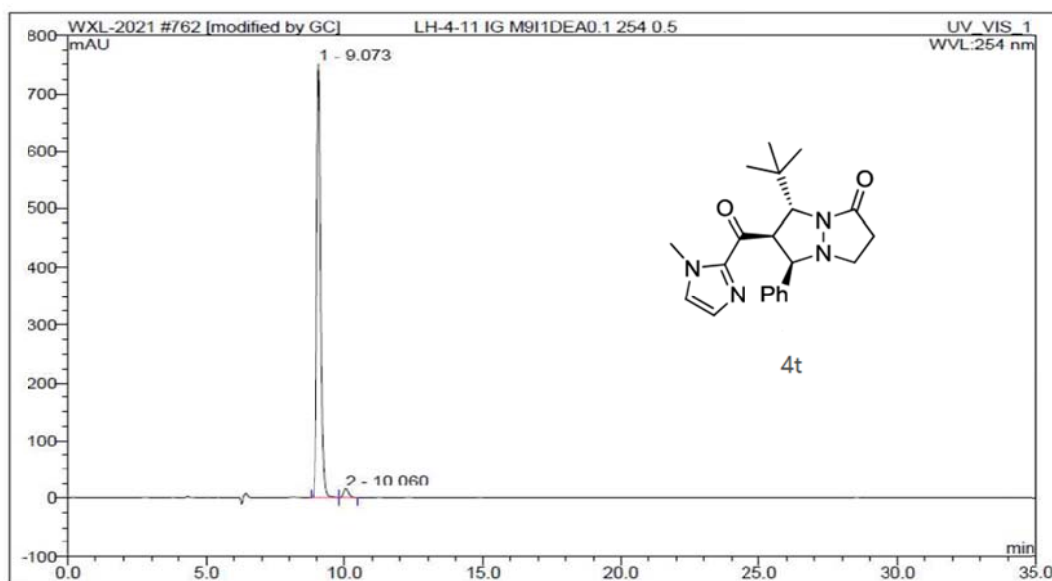

| No.           | Ret.Time min | Peak Name | Height mAU | Area mAU*min | Rel.Area % | Amount | Type |
|---------------|--------------|-----------|------------|--------------|------------|--------|------|
| 1             | 9.07         | n.a.      | 751.390    | 129.903      | 97.69      | n.a.   | BM   |
| 2             | 10.06        | n.a.      | 15.700     | 3.072        | 2.31       | n.a.   | MB   |
| <b>Total:</b> |              |           | 767.090    | 132.975      | 100.00     | 0.000  |      |

**Figure S52.** HPLC traces of racemic **4t** (reference) and chiral **4t**. Area integration = 97.69:2.31 (95% *ee*).



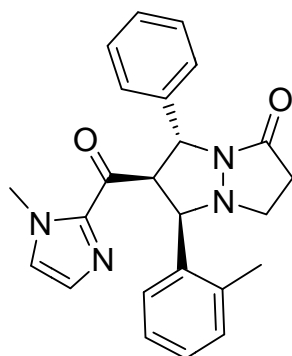

5a

Racemic 5a:

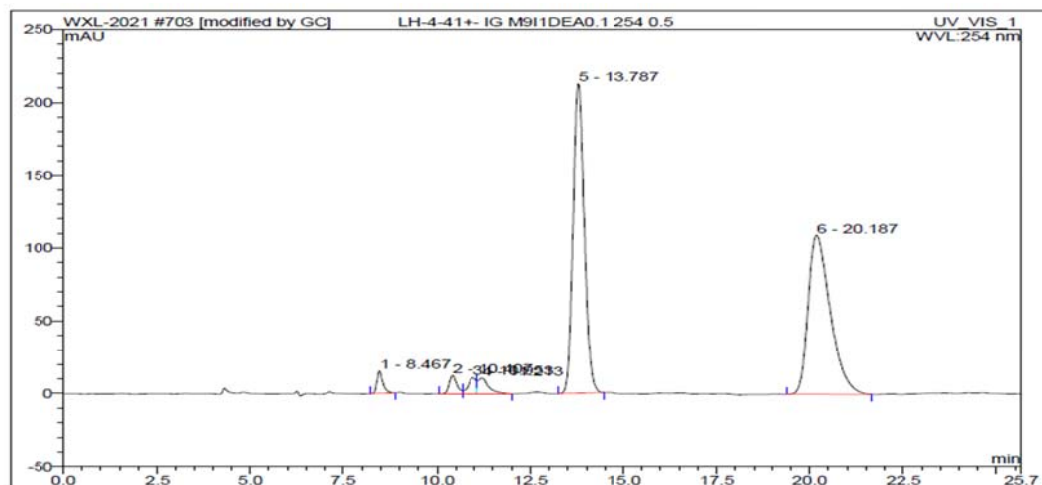

| No.           | Ret.Time<br>min | Peak Name | Height<br>mAU | Area<br>mAU*min | Rel.Area<br>% | Amount | Type |
|---------------|-----------------|-----------|---------------|-----------------|---------------|--------|------|
| 1             | 8.47            | n.a.      | 15.586        | 2.793           | 1.74          | n.a.   | BMB  |
| 2             | 10.41           | n.a.      | 12.726        | 2.975           | 1.85          | n.a.   | BM   |
| 3             | 10.95           | n.a.      | 11.131        | 2.815           | 1.75          | n.a.   | M    |
| 4             | 11.21           | n.a.      | 10.879        | 3.534           | 2.20          | n.a.   | MB   |
| 5             | 13.79           | n.a.      | 212.698       | 74.056          | 46.05         | n.a.   | BMB  |
| 6             | 20.19           | n.a.      | 109.248       | 74.633          | 46.41         | n.a.   | BMB  |
| <b>Total:</b> |                 |           | 372.267       | 160.806         | 100.00        | 0.000  |      |

Chiral 5a:

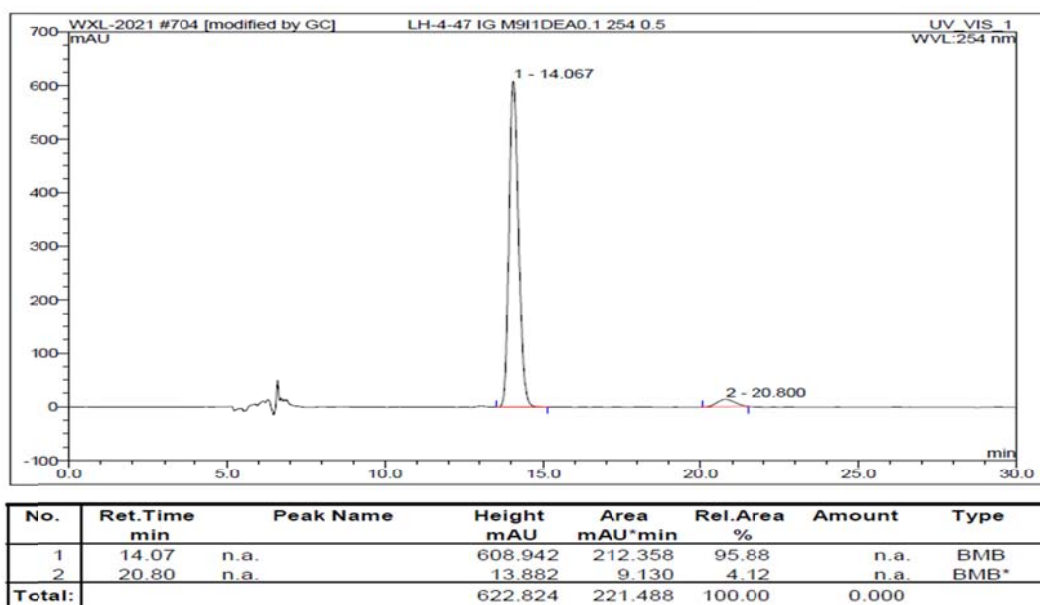

**Figure S53.** HPLC traces of racemic **5a** (reference) and chiral **5a**. Area integration = 95.88:4.12 (92% *ee*).

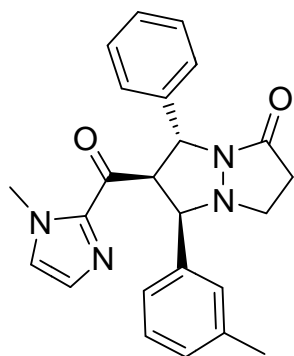

**5b**

Racemic **5b**:

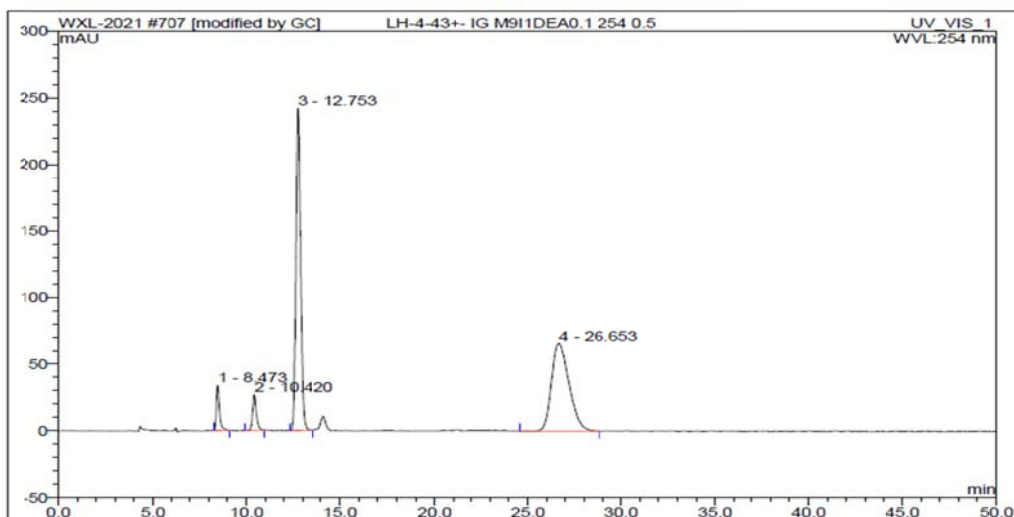

| No.           | Ret.Time<br>min | Peak Name | Height<br>mAU | Area<br>mAU*min | Rel.Area<br>% | Amount | Type |
|---------------|-----------------|-----------|---------------|-----------------|---------------|--------|------|
| 1             | 8.47            | n.a.      | 33.821        | 6.268           | 4.07          | n.a.   | BMB  |
| 2             | 10.42           | n.a.      | 26.555        | 6.101           | 3.96          | n.a.   | BMB  |
| 3             | 12.75           | n.a.      | 242.418       | 70.411          | 45.74         | n.a.   | BMB* |
| 4             | 26.65           | n.a.      | 66.325        | 71.152          | 46.22         | n.a.   | BMB* |
| <b>Total:</b> |                 |           | 369.120       | 153.931         | 100.00        | 0.000  |      |

Chiral **5b**:

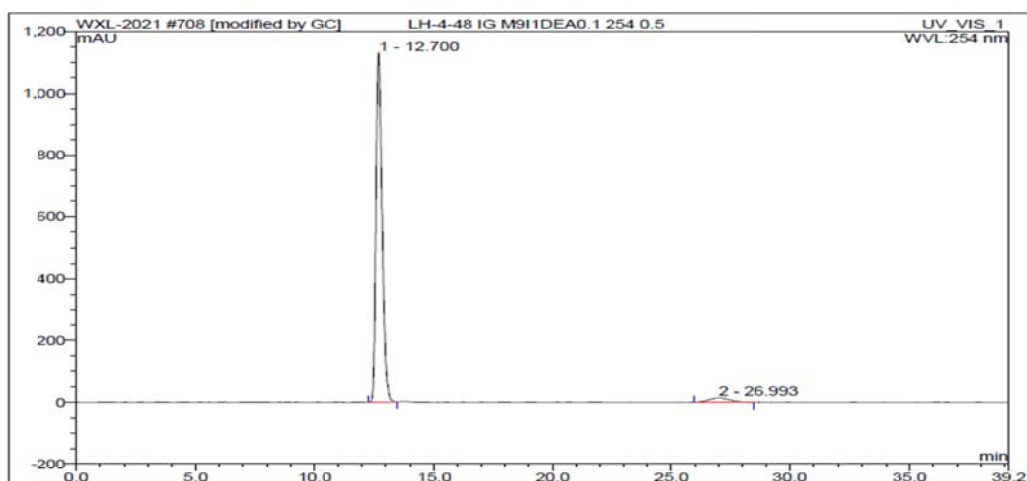

| No.           | Ret.Time<br>min | Peak Name | Height<br>mAU | Area<br>mAU*min | Rel.Area<br>% | Amount | Type |
|---------------|-----------------|-----------|---------------|-----------------|---------------|--------|------|
| 1             | 12.70           | n.a.      | 1130.361      | 336.130         | 95.93         | n.a.   | BMB* |
| 2             | 26.99           | n.a.      | 13.636        | 14.256          | 4.07          | n.a.   | BMB* |
| <b>Total:</b> |                 |           | 1143.997      | 350.386         | 100.00        | 0.000  |      |

**Figure S54.** HPLC traces of racemic **5b** (reference) and chiral **5b**. Area integration = 95.93:4.07 (92% *ee*).

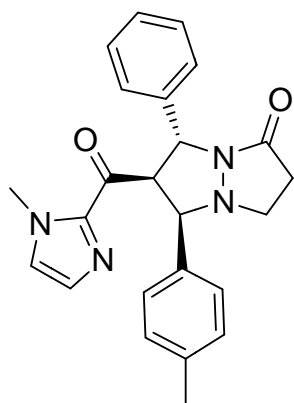

5c

Racemic 5c:

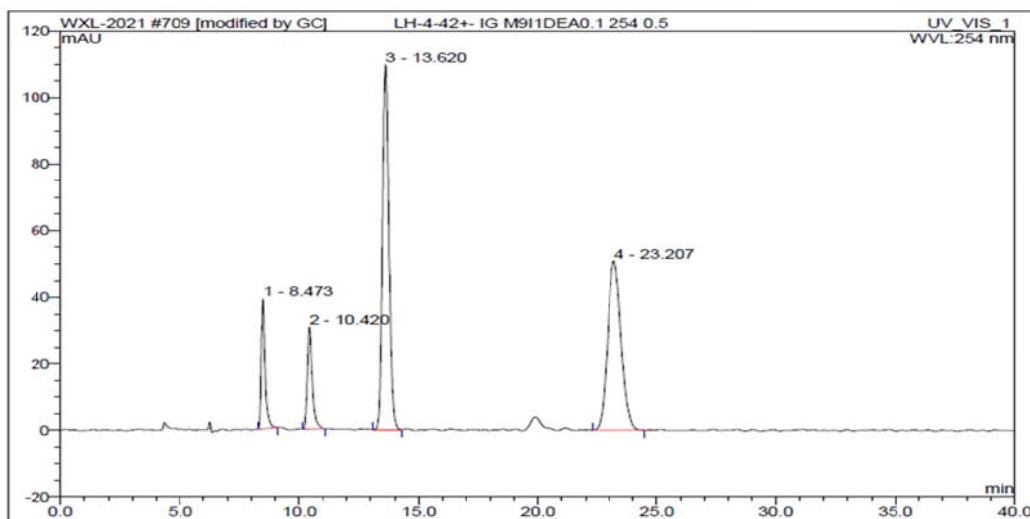

| No.           | Ret.Time min | Peak Name | Height mAU | Area mAU*min | Rel.Area % | Amount | Type |
|---------------|--------------|-----------|------------|--------------|------------|--------|------|
| 1             | 8.47         | n.a.      | 39.181     | 7.212        | 8.72       | n.a.   | BMB  |
| 2             | 10.42        | n.a.      | 30.784     | 7.263        | 8.78       | n.a.   | BMB  |
| 3             | 13.62        | n.a.      | 109.793    | 34.042       | 41.16      | n.a.   | BMB  |
| 4             | 23.21        | n.a.      | 50.955     | 34.186       | 41.34      | n.a.   | BMB  |
| <b>Total:</b> |              |           | 230.713    | 82.703       | 100.00     | 0.000  |      |

Chiral 5c:

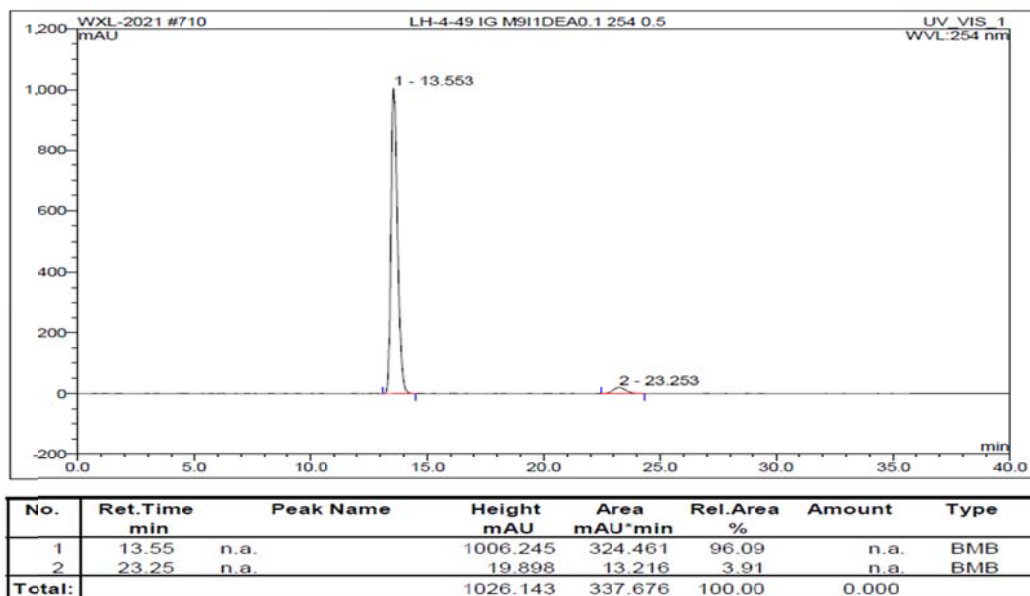

**Figure S55.** HPLC traces of racemic **5c** (reference) and chiral **5c**. Area integration = 96.09:3.91 (92% *ee*).

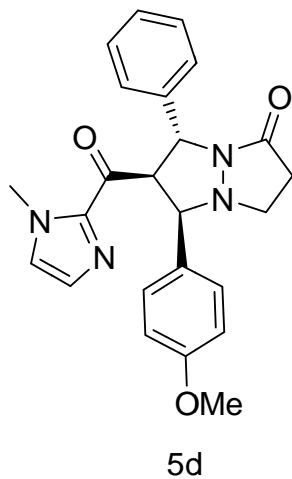

Racemic **5d**:

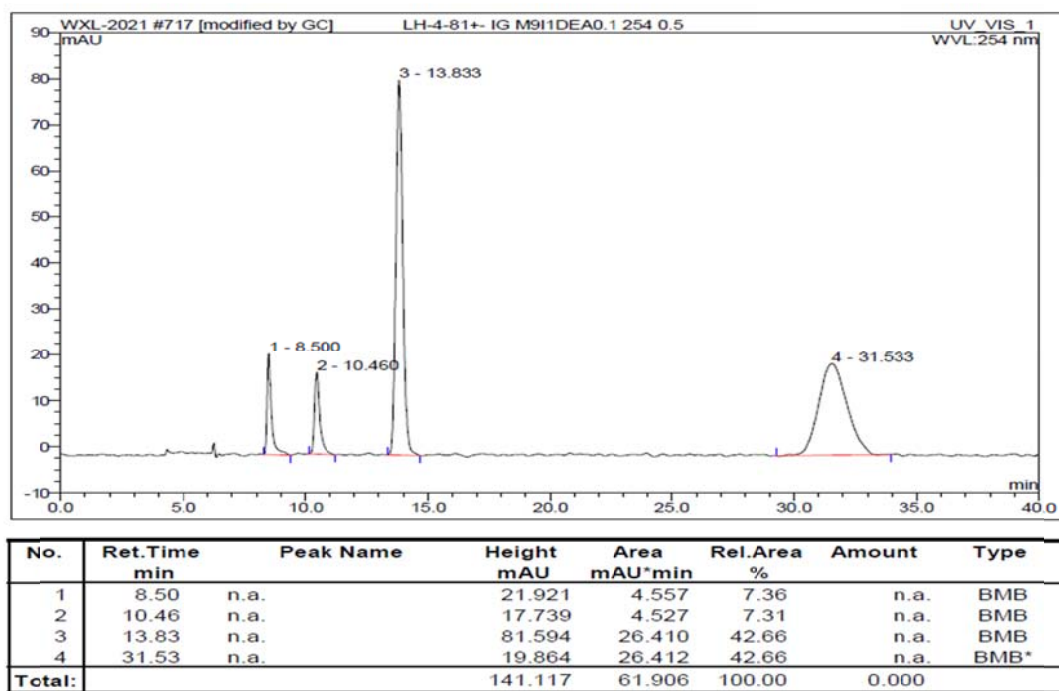

Chiral **5d**:

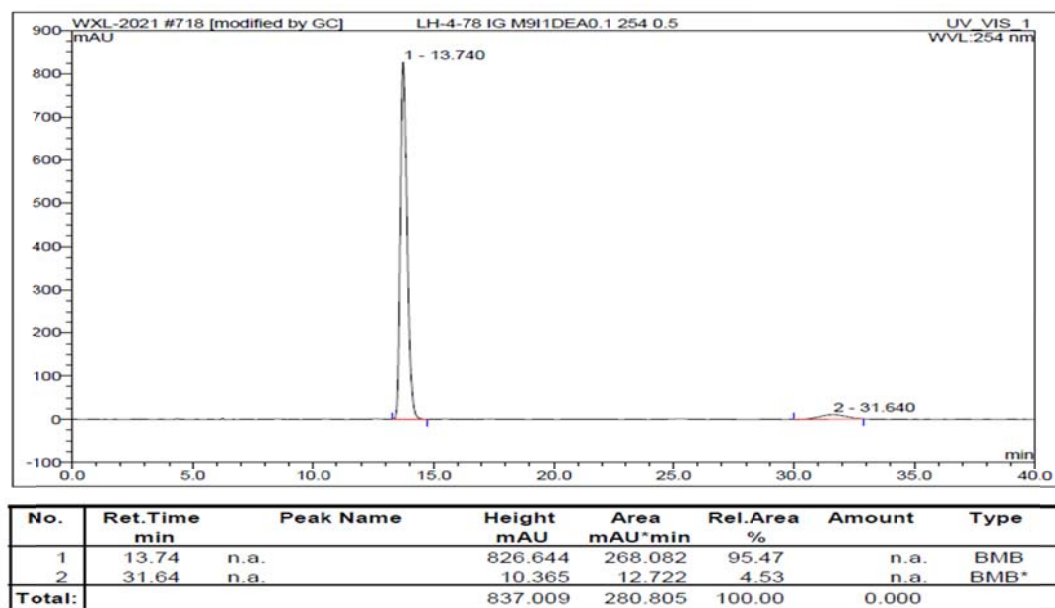

Figure S56. HPLC traces of racemic **5d** (reference) and chiral **5d**. Area integration = 95.47:4.53 (91% *ee*).

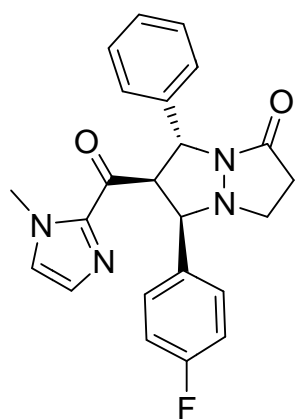

5e

Racemic 5e:

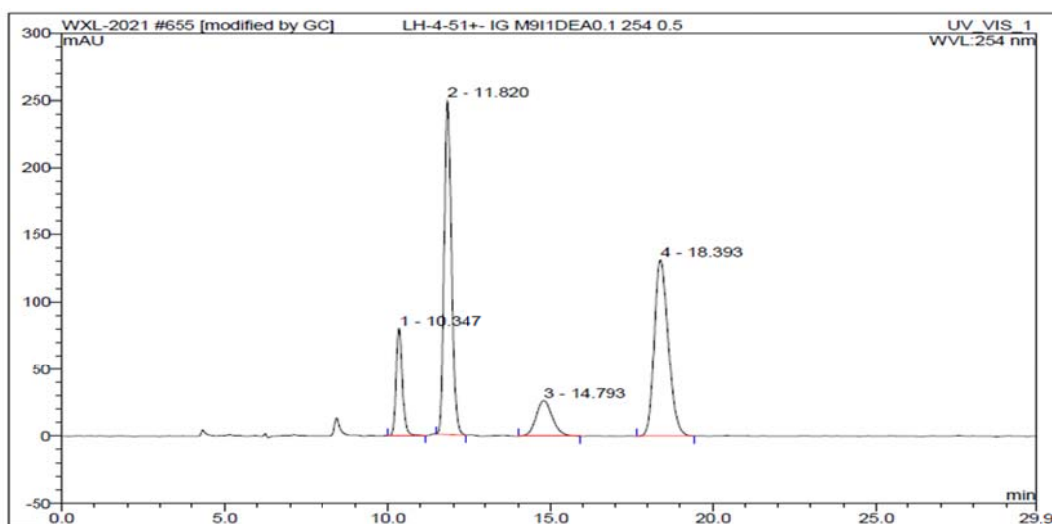

| No.           | Ret.Time<br>min | Peak Name | Height<br>mAU | Area<br>mAU*min | Rel.Area<br>% | Amount | Type |
|---------------|-----------------|-----------|---------------|-----------------|---------------|--------|------|
| 1             | 10.35           | n.a.      | 80.831        | 17.787          | 10.89         | n.a.   | BMB  |
| 2             | 11.82           | n.a.      | 249.318       | 64.643          | 39.59         | n.a.   | BMB  |
| 3             | 14.79           | n.a.      | 26.684        | 15.429          | 9.45          | n.a.   | BMB  |
| 4             | 18.39           | n.a.      | 131.186       | 65.422          | 40.07         | n.a.   | BMB  |
| <b>Total:</b> |                 |           | 488.019       | 163.281         | 100.00        | 0.000  |      |

Chiral 5e:

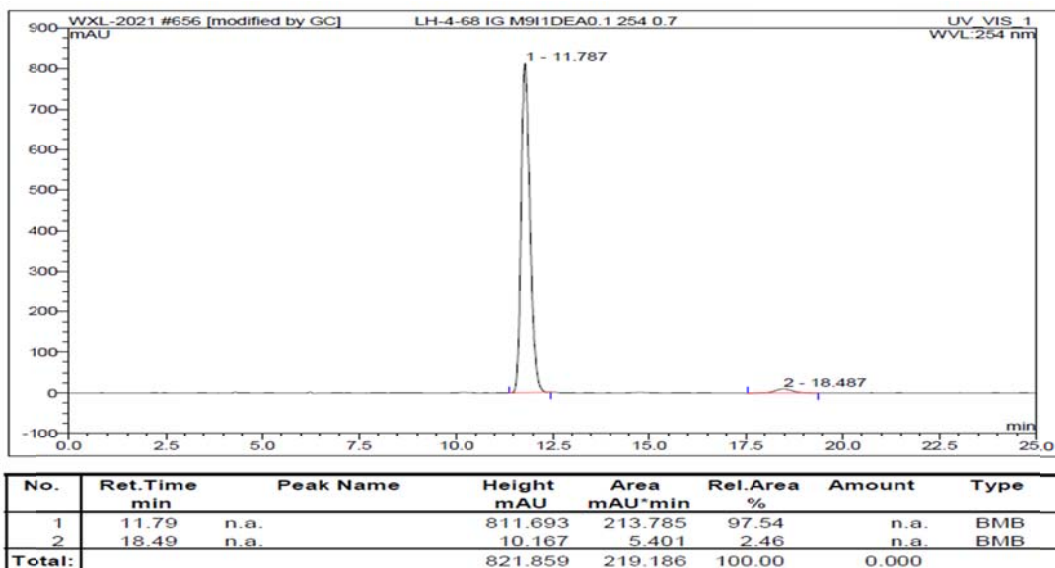

**Figure S57.** HPLC traces of racemic **5e** (reference) and chiral **5e**. Area integration = 97.54:2.46 (95% ee).

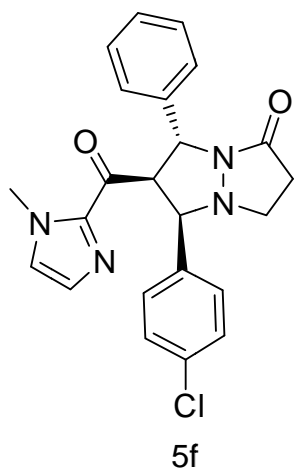

Racemic **5f**:



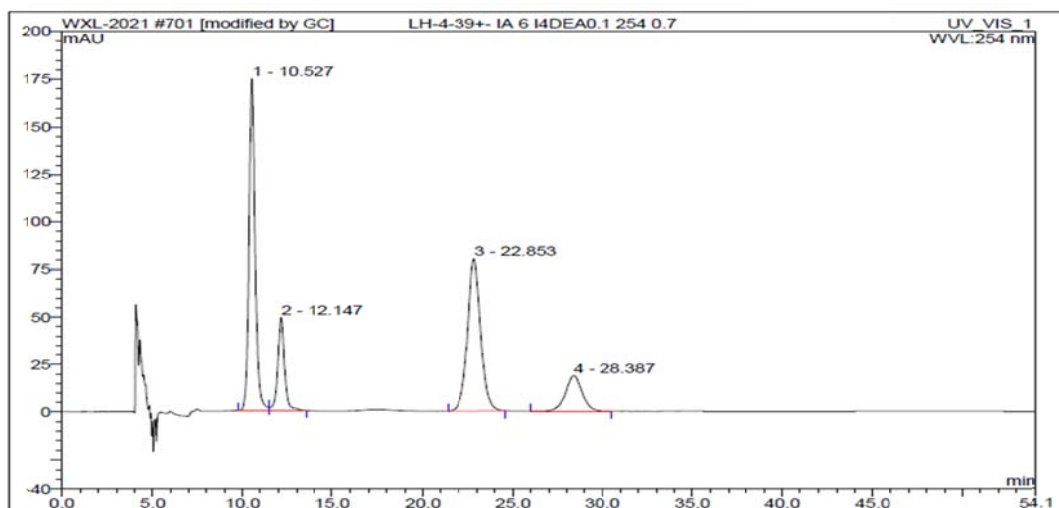

| No.           | Ret.Time min | Peak Name | Height mAU | Area mAU*min | Rel.Area % | Amount | Type |
|---------------|--------------|-----------|------------|--------------|------------|--------|------|
| 1             | 10.53        | n.a.      | 174.567    | 68.573       | 38.53      | n.a.   | BM   |
| 2             | 12.15        | n.a.      | 49.336     | 21.279       | 11.96      | n.a.   | MB   |
| 3             | 22.85        | n.a.      | 80.056     | 68.052       | 38.24      | n.a.   | BMB  |
| 4             | 28.39        | n.a.      | 18.819     | 20.078       | 11.28      | n.a.   | BMB* |
| <b>Total:</b> |              |           | 322.778    | 177.982      | 100.00     | 0.000  |      |

Chiral 5f:

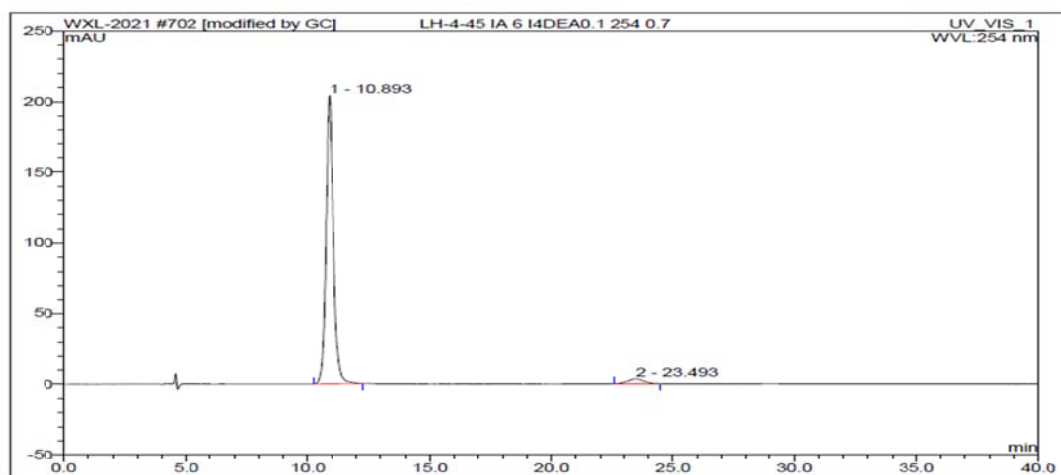

| No.           | Ret.Time min | Peak Name | Height mAU | Area mAU*min | Rel.Area % | Amount | Type |
|---------------|--------------|-----------|------------|--------------|------------|--------|------|
| 1             | 10.89        | n.a.      | 204.041    | 73.309       | 96.53      | n.a.   | BMB  |
| 2             | 23.49        | n.a.      | 3.426      | 2.637        | 3.47       | n.a.   | BMB  |
| <b>Total:</b> |              |           | 207.467    | 75.946       | 100.00     | 0.000  |      |

**Figure S58.** HPLC traces of racemic **5f** (reference) and chiral **5f**. Area integration = 96.53:3.47 (93% *ee*).

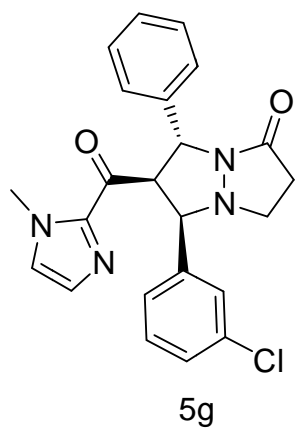

Racemic **5g**:

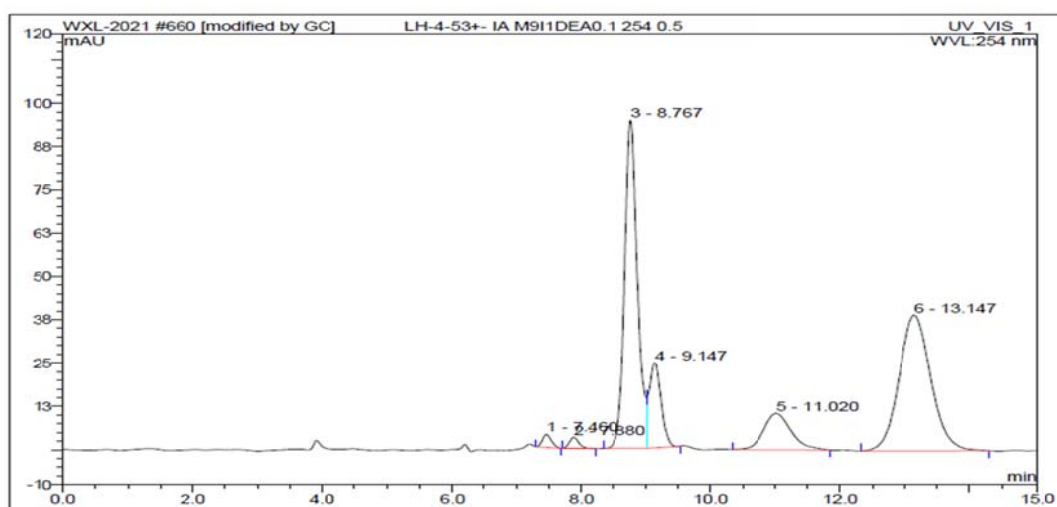

| No.           | Ret.Time<br>min | Peak Name | Height<br>mAU | Area<br>mAU*min | Rel.Area<br>% | Amount | Type |
|---------------|-----------------|-----------|---------------|-----------------|---------------|--------|------|
| 1             | 7.46            | n.a.      | 3.686         | 0.589           | 1.06          | n.a.   | BMB  |
| 2             | 7.88            | n.a.      | 3.194         | 0.551           | 0.99          | n.a.   | BMB  |
| 3             | 8.77            | n.a.      | 94.785        | 21.799          | 39.13         | n.a.   | BM * |
| 4             | 9.15            | n.a.      | 24.451        | 5.158           | 9.26          | n.a.   | MB*  |
| 5             | 11.02           | n.a.      | 10.455        | 5.164           | 9.27          | n.a.   | BMB  |
| 6             | 13.15           | n.a.      | 39.165        | 22.448          | 40.29         | n.a.   | BMB  |
| <b>Total:</b> |                 |           | 175.736       | 55.708          | 100.00        | 0.000  |      |

Chiral **5g**:

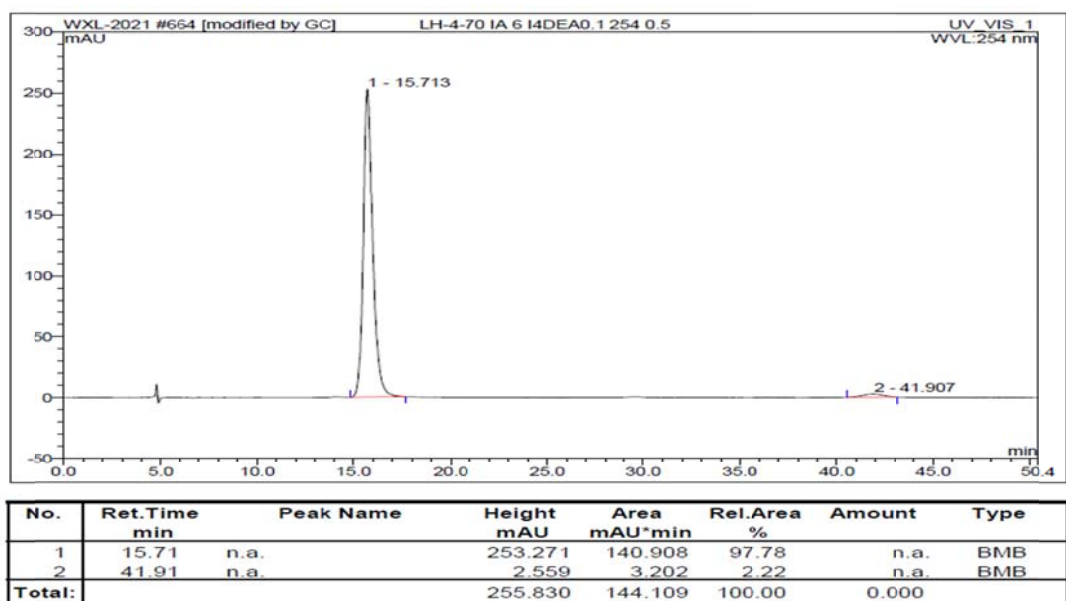

**Figure S59.** HPLC traces of racemic **5g** (reference) and chiral **5g**. Area integration = 97.78:2.22 (96% *ee*).

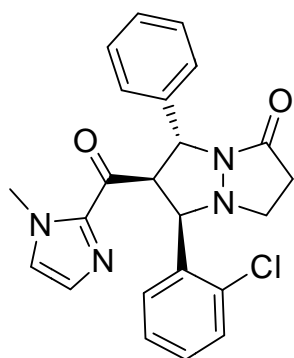

**5h**

Racemic **5h**:

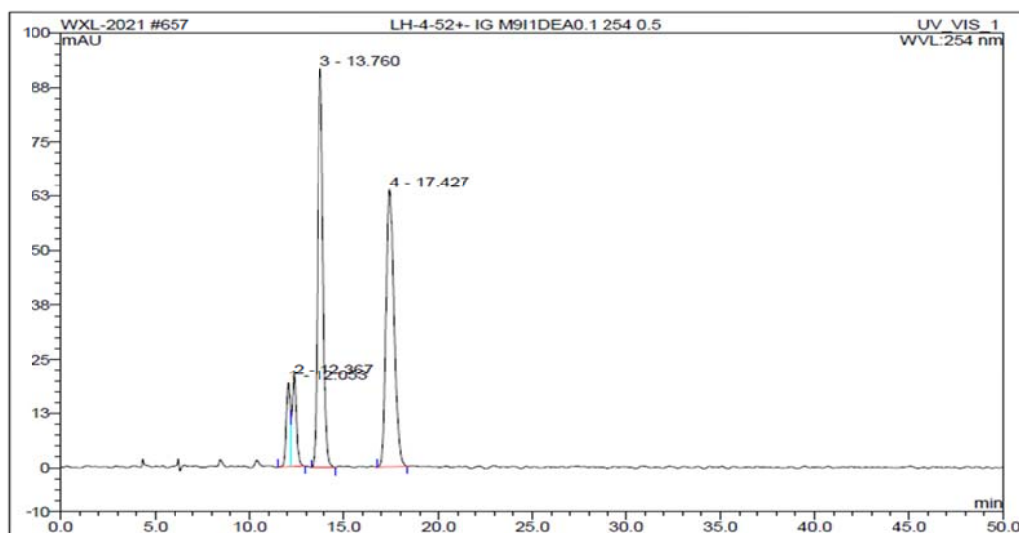

| No.           | Ret.Time min | Peak Name | Height mAU | Area mAU*min | Rel.Area % | Amount | Type |
|---------------|--------------|-----------|------------|--------------|------------|--------|------|
| 1             | 12.05        | n.a.      | 19.234     | 4.835        | 6.58       | n.a.   | BM   |
| 2             | 12.37        | n.a.      | 20.536     | 5.373        | 7.31       | n.a.   | MB   |
| 3             | 13.76        | n.a.      | 91.672     | 31.892       | 43.40      | n.a.   | BMB  |
| 4             | 17.43        | n.a.      | 63.740     | 31.376       | 42.70      | n.a.   | BMB  |
| <b>Total:</b> |              |           | 195.183    | 73.476       | 100.00     | 0.000  |      |

Chiral **5h**:

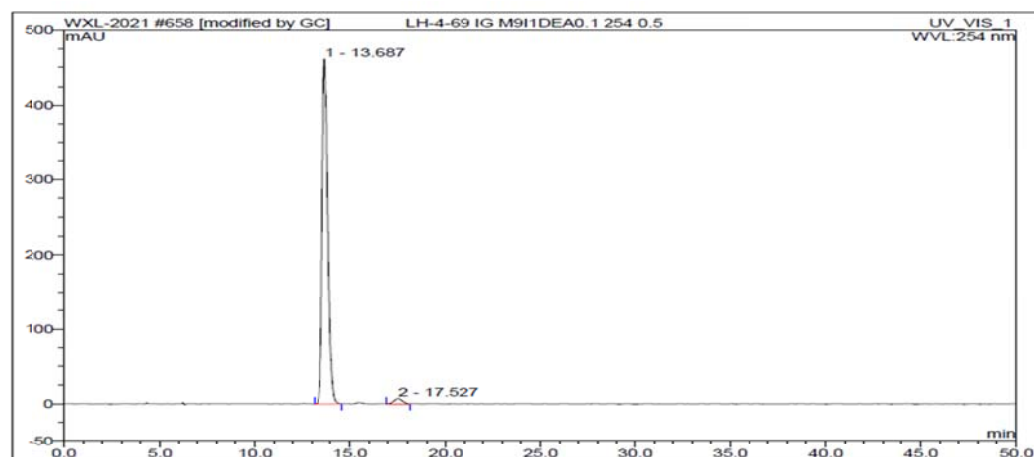

| No.           | Ret.Time min | Peak Name | Height mAU | Area mAU*min | Rel.Area % | Amount | Type |
|---------------|--------------|-----------|------------|--------------|------------|--------|------|
| 1             | 13.69        | n.a.      | 461.567    | 161.946      | 97.86      | n.a.   | BMB  |
| 2             | 17.53        | n.a.      | 7.044      | 3.546        | 2.14       | n.a.   | BMB  |
| <b>Total:</b> |              |           | 468.610    | 165.492      | 100.00     | 0.000  |      |

**Figure S60.** HPLC traces of racemic **5h** (reference) and chiral **5h**. Area integration = 97.86:2.14 (96% *ee*).

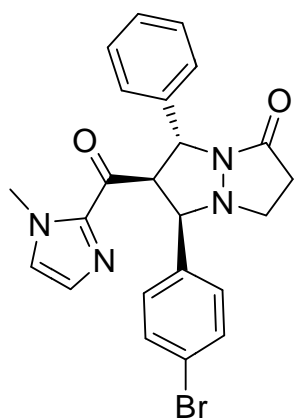

5i

Racemic 5i:

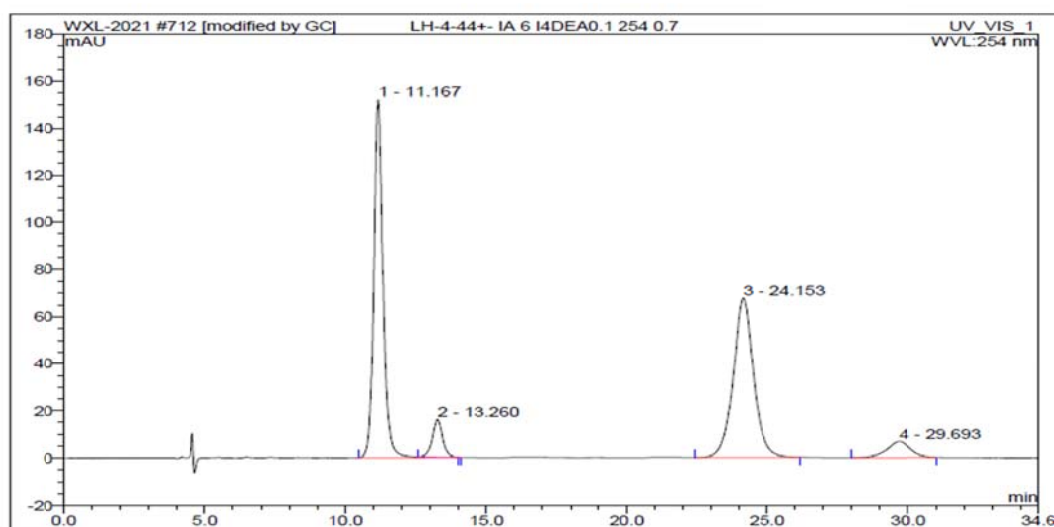

| No.           | Ret.Time<br>min | Peak Name | Height<br>mAU | Area<br>mAU*min | Rel.Area<br>% | Amount | Type |
|---------------|-----------------|-----------|---------------|-----------------|---------------|--------|------|
| 1             | 11.17           | n.a.      | 152.209       | 57.187          | 45.02         | n.a.   | BMB  |
| 2             | 13.26           | n.a.      | 15.882        | 6.562           | 5.17          | n.a.   | Rd   |
| 3             | 24.15           | n.a.      | 67.823        | 56.857          | 44.76         | n.a.   | BMB* |
| 4             | 29.69           | n.a.      | 6.679         | 6.417           | 5.05          | n.a.   | BMB* |
| <b>Total:</b> |                 |           | 242.592       | 127.022         | 100.00        | 0.000  |      |

Chiral 5i:

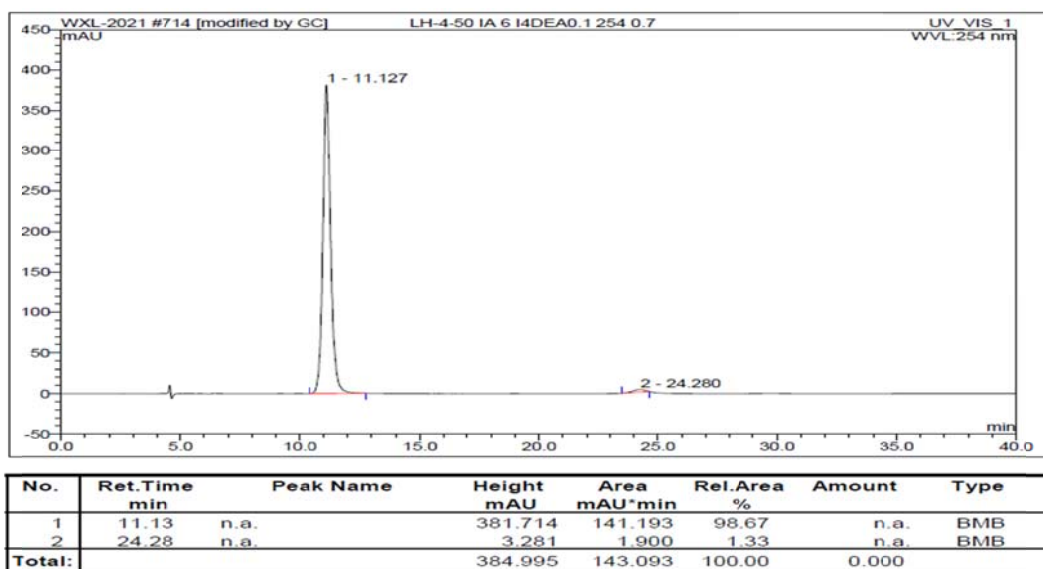

**Figure S61.** HPLC traces of racemic **5i** (reference) and chiral **5i**. Area integration = 98.67:1.33 (97% *ee*).

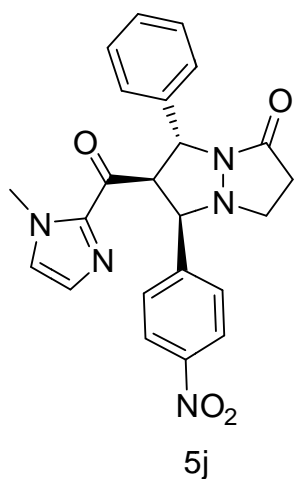

Racemic **5j**:

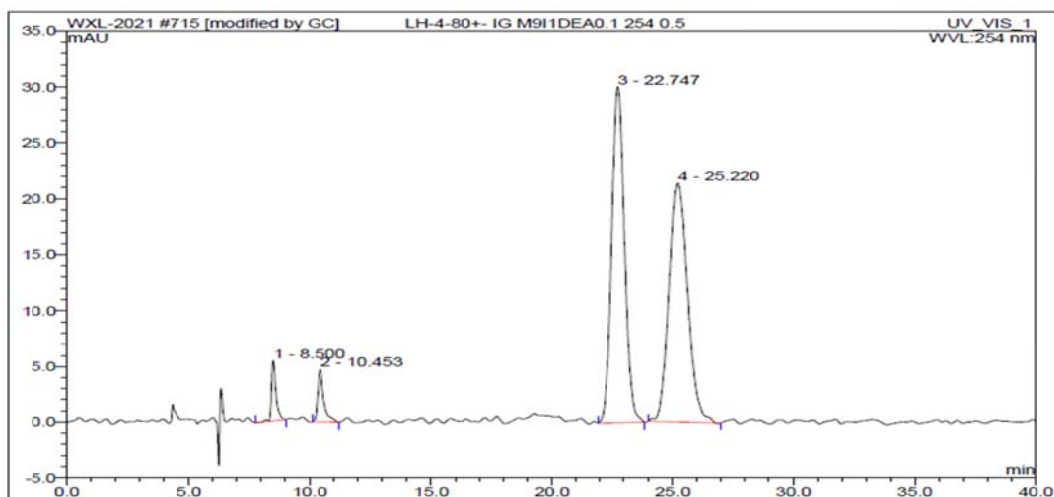

| No.           | Ret.Time min | Peak Name | Height mAU | Area mAU*min | Rel.Area % | Amount | Type |
|---------------|--------------|-----------|------------|--------------|------------|--------|------|
| 1             | 8.50         | n.a.      | 5.464      | 1.152        | 2.89       | n.a.   | BMB* |
| 2             | 10.45        | n.a.      | 4.739      | 1.352        | 3.39       | n.a.   | BMB  |
| 3             | 22.75        | n.a.      | 30.089     | 18.629       | 46.74      | n.a.   | BMB  |
| 4             | 25.22        | n.a.      | 21.383     | 18.727       | 46.98      | n.a.   | BMB* |
| <b>Total:</b> |              |           | 61.675     | 39.860       | 100.00     | 0.000  |      |

Chiral **5j**:

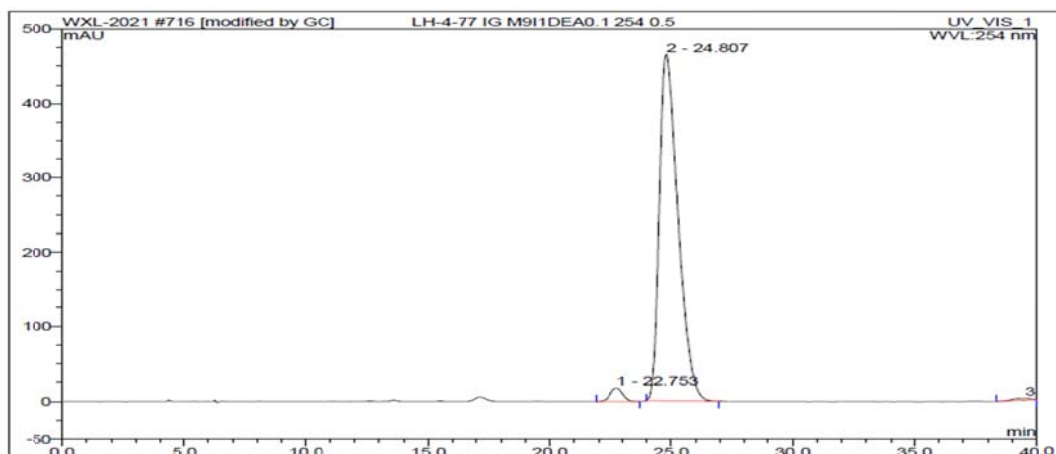

| No.           | Ret.Time min | Peak Name | Height mAU | Area mAU*min | Rel.Area % | Amount | Type |
|---------------|--------------|-----------|------------|--------------|------------|--------|------|
| 1             | 22.75        | n.a.      | 18.014     | 10.803       | 2.55       | n.a.   | BMB  |
| 2             | 24.81        | n.a.      | 464.918    | 410.544      | 96.93      | n.a.   | BMB* |
| 3             | 39.53        | n.a.      | 2.426      | 2.197        | 0.52       | n.a.   | BMB  |
| <b>Total:</b> |              |           | 485.358    | 423.543      | 100.00     | 0.000  |      |

**Figure S62.** HPLC traces of racemic **5j** (reference) and chiral **5j**. Area integration = 96.5:3.5 (93% *ee*).

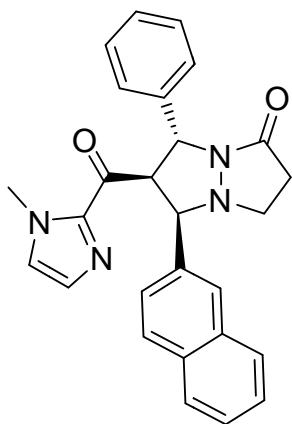

5k

Racemic 5k:

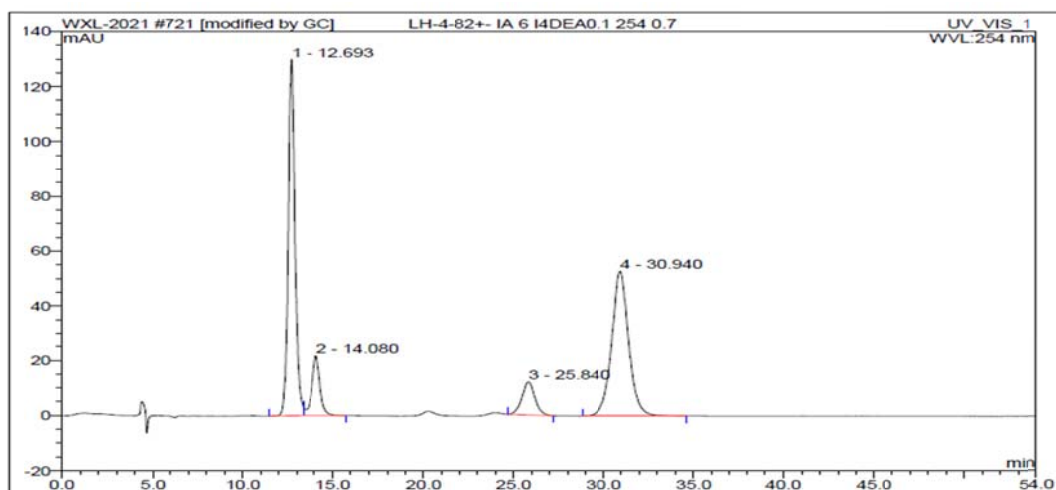

| No.           | Ret.Time<br>min | Peak Name | Height<br>mAU | Area<br>mAU*min | Rel.Area<br>% | Amount | Type |
|---------------|-----------------|-----------|---------------|-----------------|---------------|--------|------|
| 1             | 12.69           | n.a.      | 129.969       | 56.049          | 41.56         | n.a.   | BM * |
| 2             | 14.08           | n.a.      | 21.703        | 11.556          | 8.57          | n.a.   | MB*  |
| 3             | 25.84           | n.a.      | 12.006        | 9.908           | 7.35          | n.a.   | BMB* |
| 4             | 30.94           | n.a.      | 52.807        | 57.334          | 42.52         | n.a.   | BMB* |
| <b>Total:</b> |                 |           | 216.485       | 134.847         | 100.00        | 0.000  |      |

Chiral 5k



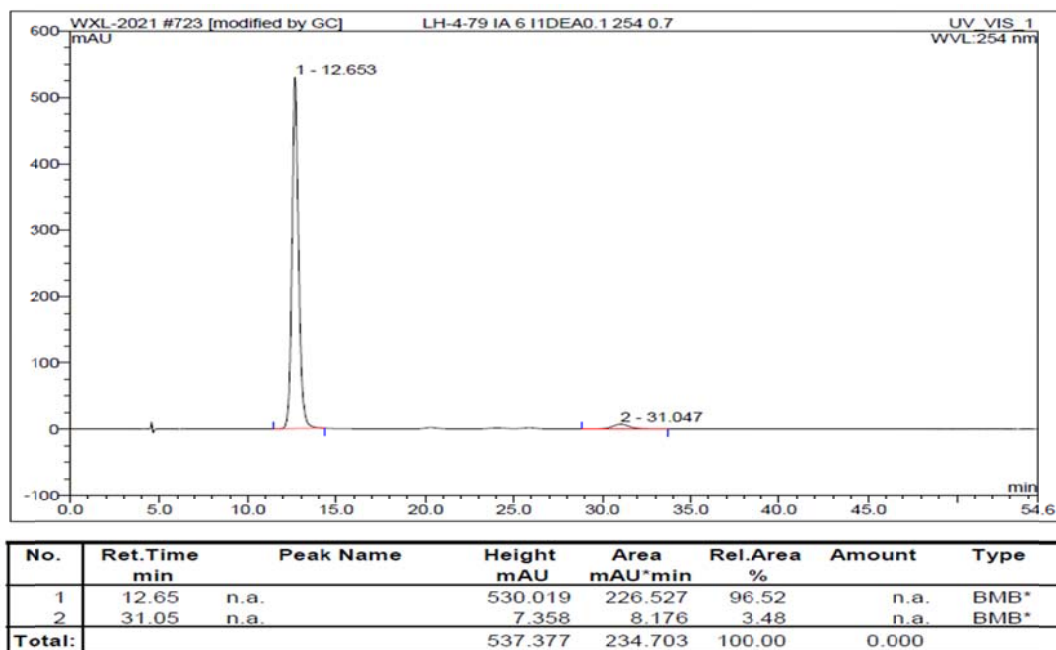

**Figure S63.** HPLC traces of racemic **5k** (reference) and chiral **5k**. Area integration = 96.52:3.48 (93% *ee*).

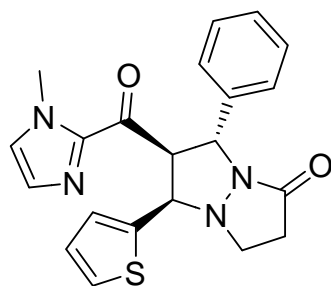

**5l**

Racemic **5l**:

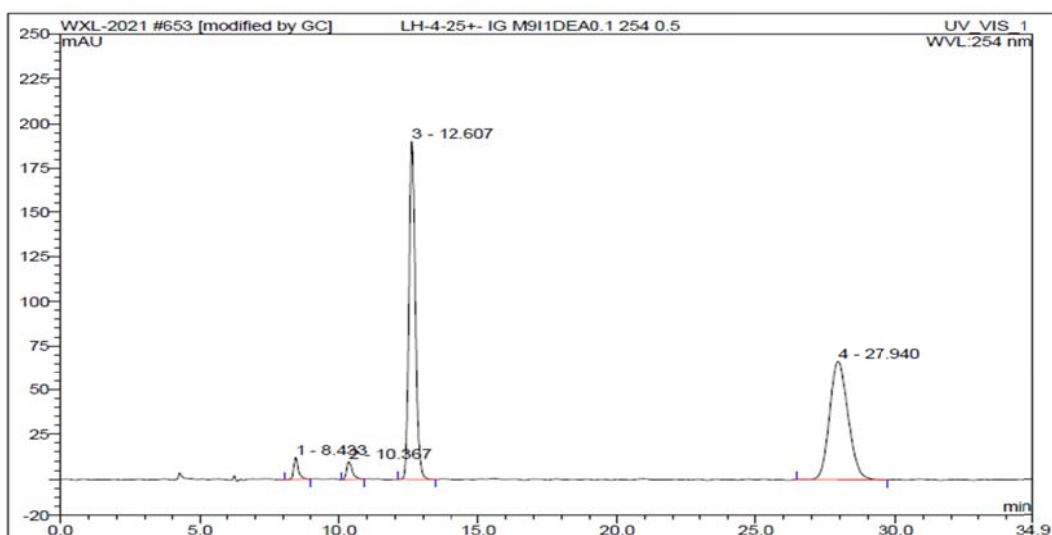

| No.           | Ret.Time min | Peak Name | Height mAU | Area mAU*min | Rel.Area % | Amount | Type |
|---------------|--------------|-----------|------------|--------------|------------|--------|------|
| 1             | 8.43         | n.a.      | 11.999     | 2.373        | 2.27       | n.a.   | BMB  |
| 2             | 10.37        | n.a.      | 9.619      | 2.308        | 2.21       | n.a.   | BMB  |
| 3             | 12.61        | n.a.      | 190.235    | 49.810       | 47.65      | n.a.   | BMB  |
| 4             | 27.94        | n.a.      | 66.430     | 50.041       | 47.87      | n.a.   | BMB* |
| <b>Total:</b> |              |           | 278.284    | 104.532      | 100.00     | 0.000  |      |

Chiral **5I**:

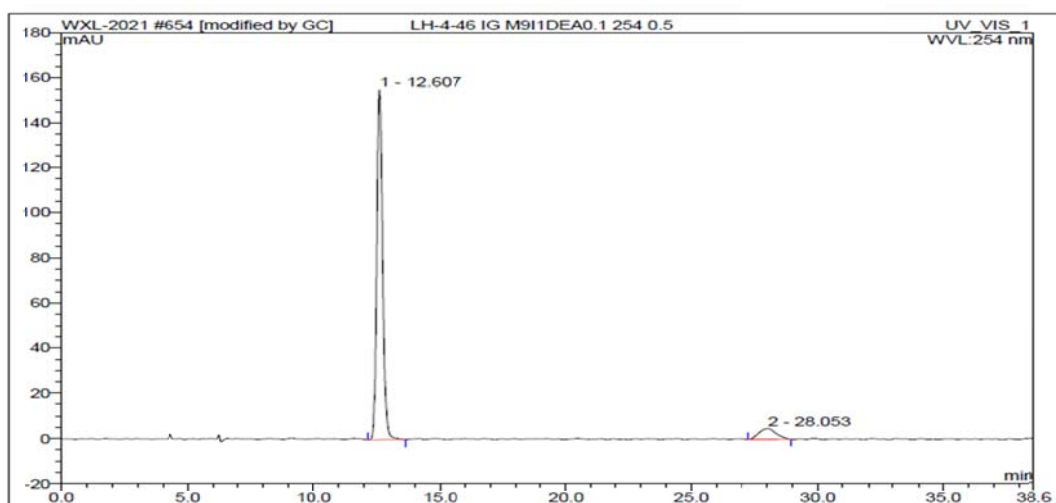

| No.           | Ret.Time min | Peak Name | Height mAU | Area mAU*min | Rel.Area % | Amount | Type |
|---------------|--------------|-----------|------------|--------------|------------|--------|------|
| 1             | 12.61        | n.a.      | 155.383    | 41.030       | 91.75      | n.a.   | BMB  |
| 2             | 28.05        | n.a.      | 4.736      | 3.691        | 8.25       | n.a.   | BMB* |
| <b>Total:</b> |              |           | 160.119    | 44.721       | 100.00     | 0.000  |      |

**Figure S64.** HPLC traces of racemic **5I** (reference) and chiral **5I**. Area integration = 91.75:8.25 (84% *ee*).

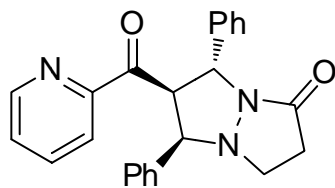

6

Racemic 6:

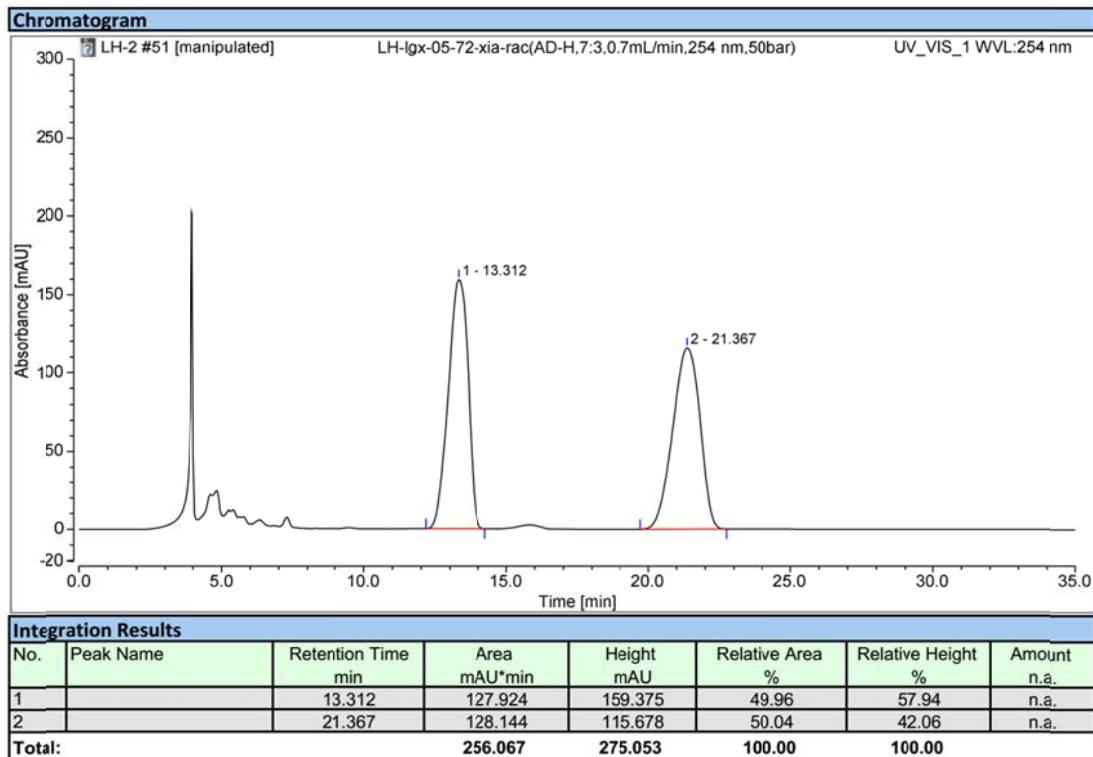

Chiral 6:

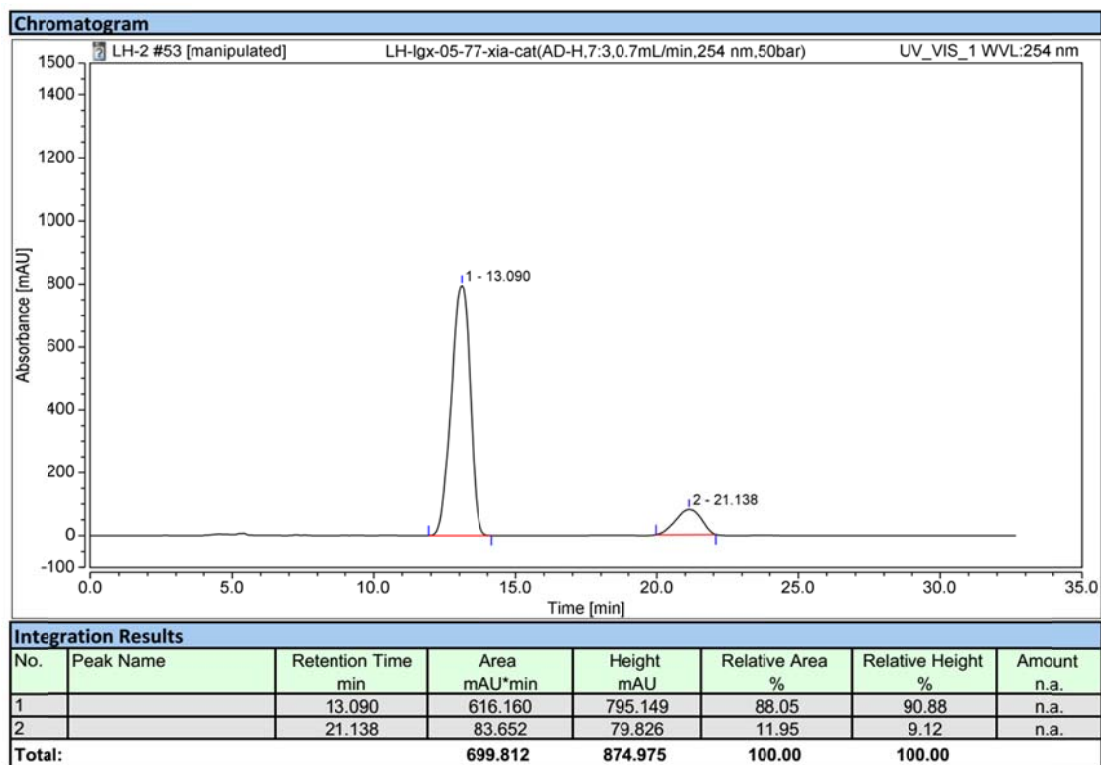

**Figure S65.** HPLC traces of racemic **6** (reference) and chiral **6**. Area integration = 88.05:11.95 (76% *ee*).

## 7. X-Ray Crystallography

### Product 4i

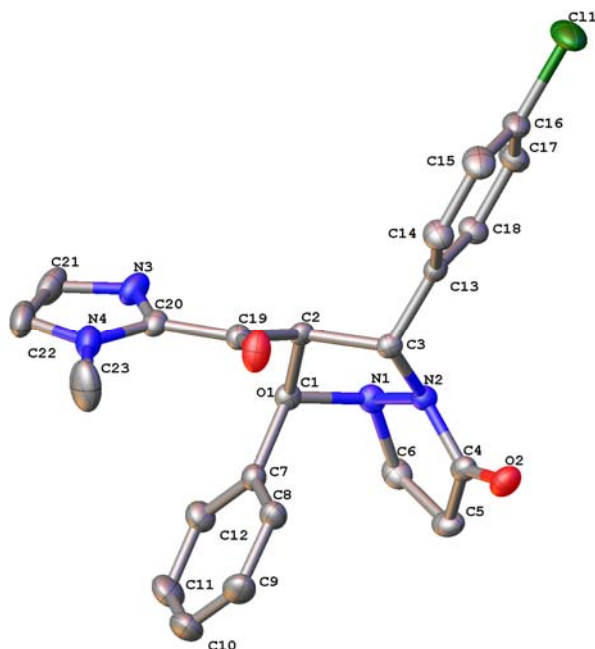

Table 1. Crystal data and structure refinement for mj21404\_0m.

|                                 |                                                                  |          |
|---------------------------------|------------------------------------------------------------------|----------|
| Identification code             | mj21404_0m                                                       |          |
| Empirical formula               | C <sub>23</sub> H <sub>21</sub> Cl N <sub>4</sub> O <sub>2</sub> |          |
| Formula weight                  | 420.89                                                           |          |
| Temperature                     | 212.99 K                                                         |          |
| Wavelength                      | 1.34139 Å                                                        |          |
| Crystal system                  | Orthorhombic                                                     |          |
| Space group                     | P2 <sub>1</sub> 2 <sub>1</sub> 2 <sub>1</sub>                    |          |
| Unit cell dimensions            | a = 6.35740(10) Å                                                | α = 90°. |
|                                 | b = 17.1204(3) Å                                                 | β = 90°. |
|                                 | c = 19.4098(4) Å                                                 | γ = 90°. |
| Volume                          | 2112.59(7) Å <sup>3</sup>                                        |          |
| Z                               | 4                                                                |          |
| Density (calculated)            | 1.323 Mg/m <sup>3</sup>                                          |          |
| Absorption coefficient          | 1.196 mm <sup>-1</sup>                                           |          |
| F(000)                          | 880                                                              |          |
| Crystal size                    | 0.15 x 0.08 x 0.06 mm <sup>3</sup>                               |          |
| Theta range for data collection | 2.994 to 54.816°.                                                |          |
| Index ranges                    | -7<=h<=5, -15<=k<=20, -23<=l<=17                                 |          |

|                                   |                                             |
|-----------------------------------|---------------------------------------------|
| Reflections collected             | 12916                                       |
| Independent reflections           | 3796 [R(int) = 0.0486]                      |
| Completeness to theta = 53.594°   | 98.1 %                                      |
| Absorption correction             | Semi-empirical from equivalents             |
| Max. and min. transmission        | 0.7508 and 0.5250                           |
| Refinement method                 | Full-matrix least-squares on F <sup>2</sup> |
| Data / restraints / parameters    | 3796 / 0 / 272                              |
| Goodness-of-fit on F <sup>2</sup> | 1.052                                       |
| Final R indices [I>2sigma(I)]     | R1 = 0.0337, wR2 = 0.0854                   |
| R indices (all data)              | R1 = 0.0363, wR2 = 0.0873                   |
| Absolute structure parameter      | 0.066(8)                                    |
| Extinction coefficient            | n/a                                         |
| Largest diff. peak and hole       | 0.189 and -0.168 e.Å <sup>-3</sup>          |

Table 2. Bond lengths [Å] and angles [°] for mj21404\_0m.

---

|             |          |
|-------------|----------|
| Cl(1)-C(16) | 1.742(2) |
| O(1)-C(19)  | 1.214(3) |
| O(2)-C(4)   | 1.221(3) |
| N(1)-N(2)   | 1.447(2) |
| N(1)-C(1)   | 1.495(3) |
| N(1)-C(6)   | 1.492(3) |
| N(2)-C(3)   | 1.461(2) |
| N(2)-C(4)   | 1.360(3) |
| N(3)-C(20)  | 1.328(3) |
| N(3)-C(21)  | 1.363(3) |
| N(4)-C(20)  | 1.358(3) |
| N(4)-C(22)  | 1.359(4) |
| N(4)-C(23)  | 1.463(4) |
| C(1)-H(1)   | 0.9900   |
| C(1)-C(2)   | 1.550(3) |
| C(1)-C(7)   | 1.514(3) |
| C(2)-H(2)   | 0.9900   |
| C(2)-C(3)   | 1.549(3) |
| C(2)-C(19)  | 1.513(3) |
| C(3)-H(3)   | 0.9900   |

|                |            |
|----------------|------------|
| C(3)-C(13)     | 1.510(3)   |
| C(4)-C(5)      | 1.503(3)   |
| C(5)-H(5A)     | 0.9800     |
| C(5)-H(5B)     | 0.9800     |
| C(5)-C(6)      | 1.519(4)   |
| C(6)-H(6A)     | 0.9800     |
| C(6)-H(6B)     | 0.9800     |
| C(7)-C(8)      | 1.392(3)   |
| C(7)-C(12)     | 1.391(3)   |
| C(8)-H(8)      | 0.9400     |
| C(8)-C(9)      | 1.386(3)   |
| C(9)-H(9)      | 0.9400     |
| C(9)-C(10)     | 1.375(5)   |
| C(10)-H(10)    | 0.9400     |
| C(10)-C(11)    | 1.377(5)   |
| C(11)-H(11)    | 0.9400     |
| C(11)-C(12)    | 1.385(4)   |
| C(12)-H(12)    | 0.9400     |
| C(13)-C(14)    | 1.388(3)   |
| C(13)-C(18)    | 1.381(3)   |
| C(14)-H(14)    | 0.9400     |
| C(14)-C(15)    | 1.390(3)   |
| C(15)-H(15)    | 0.9400     |
| C(15)-C(16)    | 1.370(4)   |
| C(16)-C(17)    | 1.382(4)   |
| C(17)-H(17)    | 0.9400     |
| C(17)-C(18)    | 1.384(3)   |
| C(18)-H(18)    | 0.9400     |
| C(19)-C(20)    | 1.458(3)   |
| C(21)-H(21)    | 0.9400     |
| C(21)-C(22)    | 1.356(5)   |
| C(22)-H(22)    | 0.9400     |
| C(23)-H(23A)   | 0.9700     |
| C(23)-H(23B)   | 0.9700     |
| C(23)-H(23C)   | 0.9700     |
| N(2)-N(1)-C(1) | 103.86(14) |
| N(2)-N(1)-C(6) | 103.53(17) |

|                  |            |
|------------------|------------|
| C(6)-N(1)-C(1)   | 117.57(17) |
| N(1)-N(2)-C(3)   | 109.90(15) |
| C(4)-N(2)-N(1)   | 114.58(16) |
| C(4)-N(2)-C(3)   | 124.83(17) |
| C(20)-N(3)-C(21) | 104.7(2)   |
| C(20)-N(4)-C(22) | 106.7(2)   |
| C(20)-N(4)-C(23) | 128.0(2)   |
| C(22)-N(4)-C(23) | 125.1(2)   |
| N(1)-C(1)-H(1)   | 108.3      |
| N(1)-C(1)-C(2)   | 99.33(15)  |
| N(1)-C(1)-C(7)   | 115.99(17) |
| C(2)-C(1)-H(1)   | 108.3      |
| C(7)-C(1)-H(1)   | 108.3      |
| C(7)-C(1)-C(2)   | 116.01(17) |
| C(1)-C(2)-H(2)   | 107.8      |
| C(3)-C(2)-C(1)   | 105.88(15) |
| C(3)-C(2)-H(2)   | 107.8      |
| C(19)-C(2)-C(1)  | 113.63(16) |
| C(19)-C(2)-H(2)  | 107.8      |
| C(19)-C(2)-C(3)  | 113.72(16) |
| N(2)-C(3)-C(2)   | 102.55(15) |
| N(2)-C(3)-H(3)   | 108.9      |
| N(2)-C(3)-C(13)  | 113.91(17) |
| C(2)-C(3)-H(3)   | 108.9      |
| C(13)-C(3)-C(2)  | 113.41(16) |
| C(13)-C(3)-H(3)  | 108.9      |
| O(2)-C(4)-N(2)   | 123.7(2)   |
| O(2)-C(4)-C(5)   | 128.7(2)   |
| N(2)-C(4)-C(5)   | 107.59(18) |
| C(4)-C(5)-H(5A)  | 110.8      |
| C(4)-C(5)-H(5B)  | 110.8      |
| C(4)-C(5)-C(6)   | 104.82(17) |
| H(5A)-C(5)-H(5B) | 108.9      |
| C(6)-C(5)-H(5A)  | 110.8      |
| C(6)-C(5)-H(5B)  | 110.8      |
| N(1)-C(6)-C(5)   | 107.36(18) |
| N(1)-C(6)-H(6A)  | 110.2      |
| N(1)-C(6)-H(6B)  | 110.2      |



|                   |            |
|-------------------|------------|
| C(5)-C(6)-H(6A)   | 110.2      |
| C(5)-C(6)-H(6B)   | 110.2      |
| H(6A)-C(6)-H(6B)  | 108.5      |
| C(8)-C(7)-C(1)    | 124.3(2)   |
| C(12)-C(7)-C(1)   | 117.7(2)   |
| C(12)-C(7)-C(8)   | 118.0(2)   |
| C(7)-C(8)-H(8)    | 119.6      |
| C(9)-C(8)-C(7)    | 120.8(2)   |
| C(9)-C(8)-H(8)    | 119.6      |
| C(8)-C(9)-H(9)    | 119.9      |
| C(10)-C(9)-C(8)   | 120.3(3)   |
| C(10)-C(9)-H(9)   | 119.9      |
| C(9)-C(10)-H(10)  | 120.1      |
| C(9)-C(10)-C(11)  | 119.8(3)   |
| C(11)-C(10)-H(10) | 120.1      |
| C(10)-C(11)-H(11) | 120.0      |
| C(10)-C(11)-C(12) | 120.1(3)   |
| C(12)-C(11)-H(11) | 120.0      |
| C(7)-C(12)-H(12)  | 119.5      |
| C(11)-C(12)-C(7)  | 121.0(3)   |
| C(11)-C(12)-H(12) | 119.5      |
| C(14)-C(13)-C(3)  | 119.45(19) |
| C(18)-C(13)-C(3)  | 121.52(18) |
| C(18)-C(13)-C(14) | 119.0(2)   |
| C(13)-C(14)-H(14) | 119.9      |
| C(13)-C(14)-C(15) | 120.3(2)   |
| C(15)-C(14)-H(14) | 119.9      |
| C(14)-C(15)-H(15) | 120.2      |
| C(16)-C(15)-C(14) | 119.6(2)   |
| C(16)-C(15)-H(15) | 120.2      |
| C(15)-C(16)-Cl(1) | 119.87(19) |
| C(15)-C(16)-C(17) | 121.1(2)   |
| C(17)-C(16)-Cl(1) | 119.0(2)   |
| C(16)-C(17)-H(17) | 120.5      |
| C(16)-C(17)-C(18) | 118.9(2)   |
| C(18)-C(17)-H(17) | 120.5      |
| C(13)-C(18)-C(17) | 121.1(2)   |
| C(13)-C(18)-H(18) | 119.5      |

|                     |            |
|---------------------|------------|
| C(17)-C(18)-H(18)   | 119.5      |
| O(1)-C(19)-C(2)     | 122.17(19) |
| O(1)-C(19)-C(20)    | 121.95(19) |
| C(20)-C(19)-C(2)    | 115.87(18) |
| N(3)-C(20)-N(4)     | 111.6(2)   |
| N(3)-C(20)-C(19)    | 123.7(2)   |
| N(4)-C(20)-C(19)    | 124.7(2)   |
| N(3)-C(21)-H(21)    | 124.6      |
| C(22)-C(21)-N(3)    | 110.7(3)   |
| C(22)-C(21)-H(21)   | 124.6      |
| N(4)-C(22)-H(22)    | 126.8      |
| C(21)-C(22)-N(4)    | 106.4(2)   |
| C(21)-C(22)-H(22)   | 126.8      |
| N(4)-C(23)-H(23A)   | 109.5      |
| N(4)-C(23)-H(23B)   | 109.5      |
| N(4)-C(23)-H(23C)   | 109.5      |
| H(23A)-C(23)-H(23B) | 109.5      |
| H(23A)-C(23)-H(23C) | 109.5      |
| H(23B)-C(23)-H(23C) | 109.5      |

---

Table 3. Torsion angles [°] for mj21404\_0m.

|                         |             |
|-------------------------|-------------|
| Cl(1)-C(16)-C(17)-C(18) | 179.11(19)  |
| O(1)-C(19)-C(20)-N(3)   | 163.0(2)    |
| O(1)-C(19)-C(20)-N(4)   | -15.5(4)    |
| O(2)-C(4)-C(5)-C(6)     | -176.2(2)   |
| N(1)-N(2)-C(3)-C(2)     | 13.98(19)   |
| N(1)-N(2)-C(3)-C(13)    | -108.97(18) |
| N(1)-N(2)-C(4)-O(2)     | -174.01(19) |
| N(1)-N(2)-C(4)-C(5)     | 7.7(2)      |
| N(1)-C(1)-C(2)-C(3)     | -34.11(18)  |
| N(1)-C(1)-C(2)-C(19)    | -159.63(16) |
| N(1)-C(1)-C(7)-C(8)     | 79.6(3)     |
| N(1)-C(1)-C(7)-C(12)    | -99.4(2)    |
| N(2)-N(1)-C(1)-C(2)     | 42.34(18)   |

|                        |             |
|------------------------|-------------|
| N(2)-N(1)-C(1)-C(7)    | -82.7(2)    |
| N(2)-N(1)-C(6)-C(5)    | 14.2(2)     |
| N(2)-C(3)-C(13)-C(14)  | -147.9(2)   |
| N(2)-C(3)-C(13)-C(18)  | 33.7(3)     |
| N(2)-C(4)-C(5)-C(6)    | 1.9(2)      |
| N(3)-C(21)-C(22)-N(4)  | 1.0(3)      |
| C(1)-N(1)-N(2)-C(3)    | -37.1(2)    |
| C(1)-N(1)-N(2)-C(4)    | 109.33(18)  |
| C(1)-N(1)-C(6)-C(5)    | -99.6(2)    |
| C(1)-C(2)-C(3)-N(2)    | 13.37(18)   |
| C(1)-C(2)-C(3)-C(13)   | 136.65(17)  |
| C(1)-C(2)-C(19)-O(1)   | 118.6(2)    |
| C(1)-C(2)-C(19)-C(20)  | -60.6(2)    |
| C(1)-C(7)-C(8)-C(9)    | 179.9(2)    |
| C(1)-C(7)-C(12)-C(11)  | 178.4(2)    |
| C(2)-C(1)-C(7)-C(8)    | -36.4(3)    |
| C(2)-C(1)-C(7)-C(12)   | 144.6(2)    |
| C(2)-C(3)-C(13)-C(14)  | 95.3(2)     |
| C(2)-C(3)-C(13)-C(18)  | -83.1(2)    |
| C(2)-C(19)-C(20)-N(3)  | -17.9(3)    |
| C(2)-C(19)-C(20)-N(4)  | 163.6(2)    |
| C(3)-N(2)-C(4)-O(2)    | -33.3(3)    |
| C(3)-N(2)-C(4)-C(5)    | 148.5(2)    |
| C(3)-C(2)-C(19)-O(1)   | -2.7(3)     |
| C(3)-C(2)-C(19)-C(20)  | 178.22(18)  |
| C(3)-C(13)-C(14)-C(15) | -178.7(2)   |
| C(3)-C(13)-C(18)-C(17) | 178.8(2)    |
| C(4)-N(2)-C(3)-C(2)    | -128.28(19) |
| C(4)-N(2)-C(3)-C(13)   | 108.8(2)    |
| C(4)-C(5)-C(6)-N(1)    | -10.3(3)    |
| C(6)-N(1)-N(2)-C(3)    | -160.48(17) |
| C(6)-N(1)-N(2)-C(4)    | -14.0(2)    |
| C(6)-N(1)-C(1)-C(2)    | 155.96(17)  |
| C(6)-N(1)-C(1)-C(7)    | 30.9(3)     |
| C(7)-C(1)-C(2)-C(3)    | 90.9(2)     |
| C(7)-C(1)-C(2)-C(19)   | -34.6(2)    |
| C(7)-C(8)-C(9)-C(10)   | 1.1(4)      |
| C(8)-C(7)-C(12)-C(11)  | -0.7(4)     |

|                         |            |
|-------------------------|------------|
| C(8)-C(9)-C(10)-C(11)   | 0.7(5)     |
| C(9)-C(10)-C(11)-C(12)  | -2.4(5)    |
| C(10)-C(11)-C(12)-C(7)  | 2.4(4)     |
| C(12)-C(7)-C(8)-C(9)    | -1.1(3)    |
| C(13)-C(14)-C(15)-C(16) | -0.1(4)    |
| C(14)-C(13)-C(18)-C(17) | 0.4(3)     |
| C(14)-C(15)-C(16)-Cl(1) | -179.0(2)  |
| C(14)-C(15)-C(16)-C(17) | 0.3(4)     |
| C(15)-C(16)-C(17)-C(18) | -0.2(4)    |
| C(16)-C(17)-C(18)-C(13) | -0.2(4)    |
| C(18)-C(13)-C(14)-C(15) | -0.3(4)    |
| C(19)-C(2)-C(3)-N(2)    | 138.83(17) |
| C(19)-C(2)-C(3)-C(13)   | -97.89(19) |
| C(20)-N(3)-C(21)-C(22)  | -0.5(3)    |
| C(20)-N(4)-C(22)-C(21)  | -1.0(3)    |
| C(21)-N(3)-C(20)-N(4)   | -0.1(3)    |
| C(21)-N(3)-C(20)-C(19)  | -178.8(2)  |
| C(22)-N(4)-C(20)-N(3)   | 0.7(3)     |
| C(22)-N(4)-C(20)-C(19)  | 179.4(2)   |
| C(23)-N(4)-C(20)-N(3)   | 175.0(3)   |
| C(23)-N(4)-C(20)-C(19)  | -6.4(4)    |
| C(23)-N(4)-C(22)-C(21)  | -175.5(3)  |

---

Table 4. Hydrogen bonds for mj21404\_0m [Å and °].

| D-H...A | d(D-H) | d(H...A) | d(D...A) | <(DHA) |
|---------|--------|----------|----------|--------|
|---------|--------|----------|----------|--------|

---

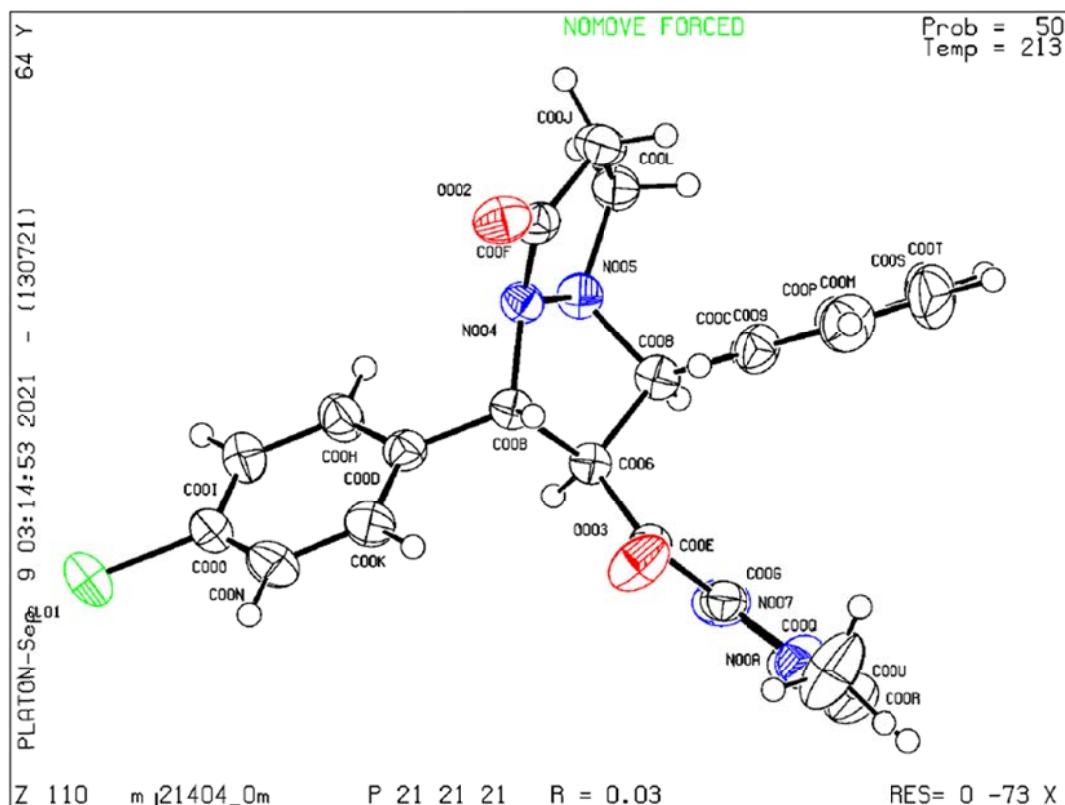

**Figure S65.** Perspective views showing 50% probability displacement

## Reference

- (1) Ping, Y. J.; Zhou, Y. M.; Wu, L. L.; Li, Z. R.; Gu, X.; Wan, X. L.; Xu, Z. J.; Che, C. M. Fe-BPsalan complex catalyzed highly enantioselective Diels-Alder reaction of alkylidene beta-ketoesters. *Organic Chemistry Frontiers* **2021**, *8*, 1910-1917.
- (2) Boersma, A. J.; Feringa, B. L.; Roelfes, G. alpha,beta-unsaturated 2-acyl imidazoles as a practical class of dienophiles for the DNA-Based catalytic asymmetric diels-alder reaction in water. *Organic Letters* **2007**, *9*, 3647-3650.
- (3) Evans, D. A.; Fandrick, K. R.; Song, H. J. Enantioselective Friedel-Crafts alkylations of alpha-beta-unsaturated 2-acyl imidazoles catalyzed by bis(oxazolanyl)pyridine-scandium(III) triflate complexes. *Journal of the American Chemical Society* **2005**, *127*, 8942-8943.
- (4) Gong, J.; Wan, Q.; Kang, Q. Asymmetric 3+2 Cycloaddition Employing N,N'-Cyclic Azomethine Imines Catalyzed by Chiral-at-Metal Rhodium Complex. *Organic Letters* **2018**, *20*, 3354-3357.
